# Supplementary material
Source: HighWire-hosted journal article supplement (https://gut.bmj.com/content/68/3/389)
Supplement: inline-supplementary-material-2 [file inline-supplementary-material-2.pdf]

**Supplemental Table 1. BETRNet EAC and BE demographic information**

| BETRNet EAC        |        | Total (n=23) | HM (n=7)  | IM (n=5)  | LM (n=7)  | MM (n=4)  |
|--------------------|--------|--------------|-----------|-----------|-----------|-----------|
| Age (mean±SD)      |        | 67.6±11.7    | 73.1±6.4  | 70.0±15.9 | 63.3±12.2 | 62.3±10.9 |
| Gender             | Male   | 20, 87%      | 6, 86%    | 5, 100%   | 5, 71%    | 4, 100%   |
|                    | Female | 3, 13%       | 1, 14%    | 0         | 2, 29%    | 0         |
|                    |        |              |           |           |           |           |
| BETRNet BE from BE |        | Total (n=59) | HM (n=17) | IM (n=16) | LM (n=12) | MM (n=14) |
| Age (mean±SD)      |        | 62.5±13.2    | 65.8±11.6 | 62.3±13.2 | 61.8±16.8 | 60.5±11.4 |
| Gender             | Male   | 52, 83%      | 94%       | 75%       | 92%       | 71%       |
|                    | Female | 11, 17%      | 6%        | 25%       | 8%        | 29%       |
