# Supplementary material
Source: HighWire-hosted journal article supplement (https://gut.bmj.com/content/68/3/389)
Supplement: inline-supplementary-material-3 [file inline-supplementary-material-3.pdf]

**Supplemental Table 2. Annotation of most variable CpG probes (n=1515).**

| Probe_ID   | chr  | pos       | strand | Unique_Genes_Mapped | Gene_Region_Mapped | Relation_to_Island | Island_Name              |
|------------|------|-----------|--------|---------------------|--------------------|--------------------|--------------------------|
| cg16691821 | chr1 | 2375627   | -      | intergenic          | none               | Island             | chr1:2374818-2375814     |
| cg22337407 | chr1 | 11046185  | -      | intergenic          | none               | OpenSea            |                          |
| cg13788258 | chr1 | 13840381  | -      | intergenic          | none               | Island             | chr1:13839505-13840613   |
| cg05046525 | chr1 | 35395821  | +      | intergenic          | none               | Island             | chr1:35394747-35396206   |
| cg03257575 | chr1 | 46951318  | -      | intergenic          | none               | Island             | chr1:46951168-46951792   |
| cg04908380 | chr1 | 47915862  | +      | intergenic          | none               | Island             | chr1:47915639-47915952   |
| cg13906377 | chr1 | 63792695  | -      | intergenic          | none               | N_Shelf            | chr1:63795363-63796140   |
| cg22025849 | chr1 | 70032907  | -      | intergenic          | none               | N_Shore            | chr1:70032967-70034495   |
| cg24525913 | chr1 | 72749880  | +      | intergenic          | none               | S_Shore            | chr1:72748471-72749736   |
| cg24437625 | chr1 | 72750671  | -      | intergenic          | none               | S_Shore            | chr1:72748471-72749736   |
| cg07923233 | chr1 | 76080727  | +      | intergenic          | none               | Island             | chr1:76080454-76080808   |
| cg21081832 | chr1 | 76081379  | -      | intergenic          | none               | Island             | chr1:76081378-76082365   |
| cg20467168 | chr1 | 76081408  | +      | intergenic          | none               | Island             | chr1:76081378-76082365   |
| cg27547954 | chr1 | 76081962  | +      | intergenic          | none               | Island             | chr1:76081378-76082365   |
| cg10101533 | chr1 | 83648176  | +      | intergenic          | none               | OpenSea            |                          |
| cg26611723 | chr1 | 91173030  | +      | intergenic          | none               | S_Shore            | chr1:91172102-91172771   |
| cg01722423 | chr1 | 111150133 | +      | intergenic          | none               | Island             | chr1:111148983-111150186 |
| cg08770506 | chr1 | 111150185 | +      | intergenic          | none               | Island             | chr1:111148983-111150186 |
| cg19356191 | chr1 | 116371337 | -      | intergenic          | none               | S_Shore            | chr1:116370810-116371303 |
| cg12062819 | chr1 | 156358231 | +      | intergenic          | none               | Island             | chr1:156358050-156358252 |
| cg26248173 | chr1 | 166853578 | -      | intergenic          | none               | Island             | chr1:166853253-166853790 |
| cg06623935 | chr1 | 214159131 | -      | intergenic          | none               | N_Shore            | chr1:214160798-214161034 |
| cg11537367 | chr1 | 218338772 | -      | intergenic          | none               | Island             | chr1:218337780-218339033 |
| cg14468913 | chr1 | 218338809 | -      | intergenic          | none               | Island             | chr1:218337780-218339033 |
| cg06146698 | chr1 | 241587099 | -      | intergenic          | none               | N_Shore            | chr1:241587601-241587883 |
| cg15454726 | chr1 | 241587609 | -      | intergenic          | none               | Island             | chr1:241587601-241587883 |
| cg16003102 | chr1 | 241587783 | +      | intergenic          | none               | Island             | chr1:241587601-241587883 |
| cg21452805 | chr1 | 244014465 | +      | intergenic          | none               | Island             | chr1:244013802-244014592 |
| cg21597595 | chr2 | 5506228   | -      | intergenic          | none               | OpenSea            |                          |
| cg17213402 | chr2 | 5813650   | +      | intergenic          | none               | Island             | chr2:5813482-5813710     |
| cg24770624 | chr2 | 20068871  | +      | intergenic          | none               | Island             | chr2:20068428-20068907   |
| cg06168026 | chr2 | 45162196  | -      | intergenic          | none               | Island             | chr2:45161427-45163058   |

|            |      |           |   |            |      |         |                          |
|------------|------|-----------|---|------------|------|---------|--------------------------|
| cg20459525 | chr2 | 45395870  | - | intergenic | none | Island  | chr2:45395869-45398186   |
| cg09862801 | chr2 | 45396991  | - | intergenic | none | Island  | chr2:45395869-45398186   |
| cg06131143 | chr2 | 48757612  | + | intergenic | none | Island  | chr2:48757211-48757785   |
| cg19384241 | chr2 | 55393977  | + | intergenic | none | OpenSea |                          |
| cg00015058 | chr2 | 66652949  | - | intergenic | none | Island  | chr2:66652691-66654218   |
| cg10089527 | chr2 | 66653254  | + | intergenic | none | Island  | chr2:66652691-66654218   |
| cg19656974 | chr2 | 66653415  | - | intergenic | none | Island  | chr2:66652691-66654218   |
| cg13451280 | chr2 | 68870812  | - | intergenic | none | Island  | chr2:68870351-68871055   |
| cg01717446 | chr2 | 71503566  | - | intergenic | none | Island  | chr2:71503547-71504233   |
| cg13686615 | chr2 | 71503742  | - | intergenic | none | Island  | chr2:71503547-71504233   |
| cg22686854 | chr2 | 79220029  | + | intergenic | none | N_Shore | chr2:79220192-79220592   |
| cg25479788 | chr2 | 79220217  | + | intergenic | none | Island  | chr2:79220192-79220592   |
| cg10156366 | chr2 | 79220381  | + | intergenic | none | Island  | chr2:79220192-79220592   |
| cg02340018 | chr2 | 105469315 | - | intergenic | none | Island  | chr2:105468851-105473488 |
| cg11014373 | chr2 | 105479054 | - | intergenic | none | Island  | chr2:105478600-105479188 |
| cg17456678 | chr2 | 119532314 | + | intergenic | none | Island  | chr2:119532065-119532315 |
| cg27664844 | chr2 | 119532486 | - | intergenic | none | S_Shore | chr2:119532065-119532315 |
| cg20593831 | chr2 | 119532492 | - | intergenic | none | S_Shore | chr2:119532065-119532315 |
| cg09385093 | chr2 | 119607885 | + | intergenic | none | Island  | chr2:119607378-119607910 |
| cg11236727 | chr2 | 119609592 | - | intergenic | none | N_Shore | chr2:119611296-119611881 |
| cg18522518 | chr2 | 127534476 | + | intergenic | none | N_Shore | chr2:127534732-127535186 |
| cg08535260 | chr2 | 127643971 | + | intergenic | none | Island  | chr2:127643800-127644104 |
| cg23460843 | chr2 | 127644075 | + | intergenic | none | Island  | chr2:127643800-127644104 |
| cg22830113 | chr2 | 127783168 | + | intergenic | none | Island  | chr2:127783081-127783311 |
| cg02139871 | chr2 | 127783370 | - | intergenic | none | S_Shore | chr2:127782613-127782829 |
| cg14261272 | chr2 | 127976400 | - | intergenic | none | Island  | chr2:127976389-127977667 |
| cg11107669 | chr2 | 127976613 | + | intergenic | none | Island  | chr2:127976389-127977667 |
| cg03738707 | chr2 | 128453335 | + | intergenic | none | Island  | chr2:128453174-128453446 |
| cg06480249 | chr2 | 130635166 | - | intergenic | none | OpenSea |                          |
| cg08901662 | chr2 | 131595321 | - | intergenic | none | S_Shore | chr2:131594139-131595302 |
| cg12796383 | chr2 | 144694405 | - | intergenic | none | N_Shore | chr2:144694666-144695180 |
| cg16263943 | chr2 | 144695179 | + | intergenic | none | Island  | chr2:144694666-144695180 |
| cg12769138 | chr2 | 168150203 | - | intergenic | none | Island  | chr2:168149033-168150797 |
| cg23064609 | chr2 | 175208594 | - | intergenic | none | Island  | chr2:175208415-175209076 |

|            |      |           |   |            |      |         |                          |
|------------|------|-----------|---|------------|------|---------|--------------------------|
| cg13501907 | chr2 | 176997504 | + | intergenic | none | S_Shore | chr2:176993479-176995557 |
| cg04739123 | chr2 | 177502854 | + | intergenic | none | Island  | chr2:177502240-177502910 |
| cg22696982 | chr2 | 177502905 | - | intergenic | none | Island  | chr2:177502240-177502910 |
| cg16650529 | chr2 | 182548750 | - | intergenic | none | Island  | chr2:182547873-182549177 |
| cg08302913 | chr2 | 182548786 | - | intergenic | none | Island  | chr2:182547873-182549177 |
| cg20019410 | chr2 | 207939050 | - | intergenic | none | OpenSea |                          |
| cg16844875 | chr2 | 237476791 | + | intergenic | none | Island  | chr2:237476311-237477263 |
| cg22991512 | chr3 | 14643854  | - | intergenic | none | Island  | chr3:14643718-14644830   |
| cg00901264 | chr3 | 14644790  | + | intergenic | none | Island  | chr3:14643718-14644830   |
| cg07040834 | chr3 | 44063541  | - | intergenic | none | Island  | chr3:44063314-44063837   |
| cg14484056 | chr3 | 62365084  | - | intergenic | none | S_Shore | chr3:62364017-62364316   |
| cg05939970 | chr3 | 127795340 | - | intergenic | none | Island  | chr3:127794369-127796136 |
| cg13719885 | chr3 | 127795394 | - | intergenic | none | Island  | chr3:127794369-127796136 |
| cg02020882 | chr3 | 128336728 | + | intergenic | none | Island  | chr3:128336406-128337113 |
| cg15595044 | chr3 | 128336857 | - | intergenic | none | Island  | chr3:128336406-128337113 |
| cg12879143 | chr3 | 138679347 | - | intergenic | none | Island  | chr3:138679244-138679579 |
| cg21624902 | chr3 | 138679358 | - | intergenic | none | Island  | chr3:138679244-138679579 |
| cg07393736 | chr3 | 172167810 | + | intergenic | none | Island  | chr3:172167526-172167866 |
| cg13519184 | chr3 | 173114306 | + | intergenic | none | N_Shore | chr3:173115404-173115775 |
| cg04599965 | chr4 | 571042    | - | intergenic | none | Island  | chr4:570950-571768       |
| cg07245225 | chr4 | 571120    | - | intergenic | none | Island  | chr4:570950-571768       |
| cg08480901 | chr4 | 1515011   | - | intergenic | none | Island  | chr4:1514858-1515210     |
| cg14964336 | chr4 | 1523275   | + | intergenic | none | Island  | chr4:1521703-1523281     |
| cg17214502 | chr4 | 4869172   | + | intergenic | none | Island  | chr4:4868440-4869173     |
| cg10946669 | chr4 | 20253130  | - | intergenic | none | N_Shore | chr4:20253276-20256868   |
| cg13755796 | chr4 | 20253514  | - | intergenic | none | Island  | chr4:20253276-20256868   |
| cg06973595 | chr4 | 55093096  | + | intergenic | none | Island  | chr4:55092961-55093242   |
| cg21585438 | chr4 | 62067189  | - | intergenic | none | Island  | chr4:62065883-62068801   |
| cg10870083 | chr4 | 62068185  | - | intergenic | none | Island  | chr4:62065883-62068801   |
| cg15205733 | chr4 | 113627483 | + | intergenic | none | Island  | chr4:113626739-113627507 |
| cg22649311 | chr4 | 134067896 | + | intergenic | none | N_Shore | chr4:134069162-134070442 |
| cg22366088 | chr4 | 154713789 | - | intergenic | none | Island  | chr4:154713537-154714240 |
| cg00966099 | chr4 | 184718401 | + | intergenic | none | Island  | chr4:184718263-184719754 |
| cg05648010 | chr5 | 53545     | - | intergenic | none | Island  | chr5:53111-54264         |

|            |      |           |   |            |      |         |                          |
|------------|------|-----------|---|------------|------|---------|--------------------------|
| cg18738814 | chr5 | 92385     | - | intergenic | none | Island  | chr5:92007-92438         |
| cg25378916 | chr5 | 1875013   | - | intergenic | none | Island  | chr5:1874907-1879032     |
| cg14024788 | chr5 | 1875611   | + | intergenic | none | Island  | chr5:1874907-1879032     |
| cg26195178 | chr5 | 1885716   | + | intergenic | none | Island  | chr5:1881924-1887743     |
| cg12523526 | chr5 | 2756005   | - | intergenic | none | Island  | chr5:2748368-2757024     |
| cg05659097 | chr5 | 2757244   | - | intergenic | none | S_Shore | chr5:2748368-2757024     |
| cg01939562 | chr5 | 3105012   | + | intergenic | none | OpenSea |                          |
| cg10427452 | chr5 | 3122030   | - | intergenic | none | OpenSea |                          |
| cg11857997 | chr5 | 3591992   | + | intergenic | none | Island  | chr5:3590644-3592000     |
| cg04144394 | chr5 | 3594178   | + | intergenic | none | N_Shore | chr5:3594467-3603054     |
| cg27586797 | chr5 | 13664584  | - | intergenic | none | OpenSea |                          |
| cg22697364 | chr5 | 32709859  | + | intergenic | none | N_Shore | chr5:32709910-32714450   |
| cg17045804 | chr5 | 32710009  | - | intergenic | none | Island  | chr5:32709910-32714450   |
| cg18064852 | chr5 | 36690457  | - | intergenic | none | Island  | chr5:36690207-36690658   |
| cg00132108 | chr5 | 36690657  | + | intergenic | none | Island  | chr5:36690207-36690658   |
| cg06843889 | chr5 | 42949542  | + | intergenic | none | N_Shore | chr5:42951076-42952410   |
| cg13930261 | chr5 | 42949882  | - | intergenic | none | N_Shore | chr5:42951076-42952410   |
| cg10932018 | chr5 | 54516487  | + | intergenic | none | Island  | chr5:54516267-54516919   |
| cg08350776 | chr5 | 54516538  | + | intergenic | none | Island  | chr5:54516267-54516919   |
| cg24828151 | chr5 | 54516779  | + | intergenic | none | Island  | chr5:54516267-54516919   |
| cg18456523 | chr5 | 54516805  | + | intergenic | none | Island  | chr5:54516267-54516919   |
| cg23378989 | chr5 | 131991993 | + | intergenic | none | Island  | chr5:131991554-131992304 |
| cg11608150 | chr5 | 135415948 | - | intergenic | none | N_Shore | chr5:135416204-135416475 |
| cg24799909 | chr5 | 145724482 | + | intergenic | none | Island  | chr5:145724294-145724551 |
| cg11601027 | chr5 | 153852690 | - | intergenic | none | N_Shore | chr5:153853056-153853551 |
| cg24202381 | chr5 | 153862450 | + | intergenic | none | Island  | chr5:153862142-153862451 |
| cg02326568 | chr5 | 158533621 | - | intergenic | none | Island  | chr5:158533557-158534000 |
| cg01088410 | chr5 | 170739179 | - | intergenic | none | Island  | chr5:170735169-170739863 |
| cg13004182 | chr5 | 172665707 | - | intergenic | none | Island  | chr5:172665306-172666072 |
| cg05849109 | chr5 | 180531288 | + | intergenic | none | S_Shore | chr5:180531008-180531218 |
| cg00631329 | chr6 | 26305371  | + | intergenic | none | OpenSea |                          |
| cg13736514 | chr6 | 26305472  | - | intergenic | none | OpenSea |                          |
| cg13974773 | chr6 | 27463217  | + | intergenic | none | Island  | chr6:27463176-27463379   |
| cg09987651 | chr6 | 27463667  | + | intergenic | none | S_Shore | chr6:27463176-27463379   |

|            |      |           |   |            |      |         |                          |
|------------|------|-----------|---|------------|------|---------|--------------------------|
| cg27131891 | chr6 | 27513414  | + | intergenic | none | OpenSea |                          |
| cg05310764 | chr6 | 27513479  | - | intergenic | none | OpenSea |                          |
| cg27658416 | chr6 | 28603033  | + | intergenic | none | Island  | chr6:28602853-28603295   |
| cg06466508 | chr6 | 28641622  | - | intergenic | none | OpenSea |                          |
| cg03442350 | chr6 | 28641629  | - | intergenic | none | OpenSea |                          |
| cg23691021 | chr6 | 28641651  | + | intergenic | none | OpenSea |                          |
| cg02841000 | chr6 | 28642062  | - | intergenic | none | OpenSea |                          |
| cg08957069 | chr6 | 28743700  | + | intergenic | none | OpenSea |                          |
| cg05404698 | chr6 | 28956247  | - | intergenic | none | Island  | chr6:28956106-28956578   |
| cg25255293 | chr6 | 28979290  | - | intergenic | none | Island  | chr6:28979246-28979499   |
| cg21107549 | chr6 | 28979307  | - | intergenic | none | Island  | chr6:28979246-28979499   |
| cg08789053 | chr6 | 28979437  | - | intergenic | none | Island  | chr6:28979246-28979499   |
| cg02665416 | chr6 | 28984461  | + | intergenic | none | Island  | chr6:28984418-28984686   |
| cg26816707 | chr6 | 101842034 | - | intergenic | none | S_Shore | chr6:101841425-101841905 |
| cg20295992 | chr6 | 108440280 | - | intergenic | none | Island  | chr6:108437998-108441208 |
| cg09386619 | chr6 | 125420923 | - | intergenic | none | Island  | chr6:125420743-125421141 |
| cg06700935 | chr7 | 1704584   | - | intergenic | none | Island  | chr7:1703861-1710517     |
| cg06134410 | chr7 | 1705349   | + | intergenic | none | Island  | chr7:1703861-1710517     |
| cg20753954 | chr7 | 1706809   | + | intergenic | none | Island  | chr7:1703861-1710517     |
| cg11362988 | chr7 | 1706883   | + | intergenic | none | Island  | chr7:1703861-1710517     |
| cg06367154 | chr7 | 1707338   | + | intergenic | none | Island  | chr7:1703861-1710517     |
| cg23617583 | chr7 | 20817296  | - | intergenic | none | N_Shore | chr7:20817455-20818227   |
| cg08637618 | chr7 | 27279329  | - | intergenic | none | Island  | chr7:27278945-27279469   |
| cg03704308 | chr7 | 42533414  | + | intergenic | none | S_Shore | chr7:42533076-42533283   |
| cg13990351 | chr7 | 64349133  | + | intergenic | none | N_Shore | chr7:64349424-64350151   |
| cg19082708 | chr7 | 64349557  | - | intergenic | none | Island  | chr7:64349424-64350151   |
| cg24002887 | chr7 | 64407743  | + | intergenic | none | Island  | chr7:64407589-64408299   |
| cg05841659 | chr7 | 64712472  | + | intergenic | none | Island  | chr7:64712213-64712786   |
| cg12004183 | chr7 | 71217124  | - | intergenic | none | OpenSea |                          |
| cg01680010 | chr7 | 96647117  | - | intergenic | none | S_Shore | chr7:96645786-96646599   |
| cg08832624 | chr7 | 98099917  | + | intergenic | none | Island  | chr7:98099882-98100289   |
| cg24494316 | chr7 | 113726705 | + | intergenic | none | Island  | chr7:113724924-113727795 |
| cg03793066 | chr7 | 113726854 | - | intergenic | none | Island  | chr7:113724924-113727795 |
| cg24490630 | chr7 | 113726873 | - | intergenic | none | Island  | chr7:113724924-113727795 |

|            |      |           |   |            |      |         |                          |
|------------|------|-----------|---|------------|------|---------|--------------------------|
| cg07959771 | chr7 | 121956740 | - | intergenic | none | Island  | chr7:121956543-121957341 |
| cg00158528 | chr7 | 121956859 | - | intergenic | none | Island  | chr7:121956543-121957341 |
| cg21005154 | chr7 | 140340155 | + | intergenic | none | Island  | chr7:140339997-140341136 |
| cg07028821 | chr7 | 140773905 | + | intergenic | none | Island  | chr7:140772358-140774560 |
| cg20183619 | chr7 | 155241490 | - | intergenic | none | Island  | chr7:155241323-155243757 |
| cg14521995 | chr7 | 157263638 | - | intergenic | none | S_Shore | chr7:157262951-157263458 |
| cg00280177 | chr8 | 24799870  | - | intergenic | none | Island  | chr8:24799703-24800147   |
| cg08097281 | chr8 | 26724744  | + | intergenic | none | S_Shore | chr8:26721642-26724566   |
| cg09516839 | chr8 | 26724782  | + | intergenic | none | S_Shore | chr8:26721642-26724566   |
| cg17504341 | chr8 | 26724836  | + | intergenic | none | S_Shore | chr8:26721642-26724566   |
| cg11787346 | chr8 | 55367611  | + | intergenic | none | Island  | chr8:55366180-55367628   |
| cg22682682 | chr8 | 57070217  | + | intergenic | none | S_Shore | chr8:57069687-57070047   |
| cg19749660 | chr8 | 65284514  | + | intergenic | none | N_Shore | chr8:65286067-65286659   |
| cg16464373 | chr8 | 65293734  | + | intergenic | none | S_Shelf | chr8:65290108-65290946   |
| cg00588920 | chr8 | 72917147  | - | intergenic | none | N_Shore | chr8:72917305-72917641   |
| cg16814680 | chr8 | 91681699  | + | intergenic | none | OpenSea |                          |
| cg00563873 | chr8 | 93115461  | - | intergenic | none | Island  | chr8:93114056-93115979   |
| cg26980111 | chr8 | 132321917 | + | intergenic | none | OpenSea |                          |
| cg22863209 | chr8 | 142425581 | + | intergenic | none | Island  | chr8:142425440-142425716 |
| cg06573787 | chr8 | 143070187 | - | intergenic | none | OpenSea |                          |
| cg16296826 | chr8 | 143530749 | + | intergenic | none | Island  | chr8:143530645-143530872 |
| cg06166932 | chr8 | 143530800 | - | intergenic | none | Island  | chr8:143530645-143530872 |
| cg02707869 | chr8 | 143532613 | + | intergenic | none | Island  | chr8:143531118-143534495 |
| cg04812475 | chr9 | 17906561  | + | intergenic | none | Island  | chr9:17906419-17907488   |
| cg02649279 | chr9 | 29212689  | + | intergenic | none | Island  | chr9:29212171-29212819   |
| cg14583869 | chr9 | 34701531  | - | intergenic | none | Island  | chr9:34701218-34701834   |
| cg02671126 | chr9 | 34701735  | + | intergenic | none | Island  | chr9:34701218-34701834   |
| cg14172603 | chr9 | 37037526  | + | intergenic | none | Island  | chr9:37034135-37038341   |
| cg17534202 | chr9 | 96721102  | + | intergenic | none | Island  | chr9:96720586-96723189   |
| cg18794404 | chr1 | 22542024  | + | intergenic | none | Island  | chr10:22540707-22542739  |
| cg03319479 | chr1 | 23487758  | - | intergenic | none | Island  | chr10:23487757-23488543  |
| cg18937827 | chr1 | 27547704  | - | intergenic | none | Island  | chr10:27547668-27548402  |
| cg07875430 | chr1 | 27547845  | - | intergenic | none | Island  | chr10:27547668-27548402  |
| cg11986813 | chr1 | 43429144  | - | intergenic | none | Island  | chr10:43428167-43429460  |

|            |           |               |   |            |      |         |                               |
|------------|-----------|---------------|---|------------|------|---------|-------------------------------|
| cg10786572 | chr1<br>0 | 5463232<br>2  | - | intergenic | none | S_Shore | chr10:5463121<br>1-54631426   |
| cg07451261 | chr1<br>0 | 1024150<br>86 | + | intergenic | none | Island  | chr10:1024144<br>25-102416315 |
| cg22689833 | chr1<br>0 | 1024159<br>91 | - | intergenic | none | Island  | chr10:1024144<br>25-102416315 |
| cg24053165 | chr1<br>0 | 1024692<br>94 | - | intergenic | none | N_Shore | chr10:1024698<br>06-102470341 |
| cg17453460 | chr1<br>0 | 1183694<br>23 | + | intergenic | none | Island  | chr10:1183685<br>79-118369424 |
| cg26678605 | chr1<br>0 | 1189250<br>11 | + | intergenic | none | N_Shore | chr10:1189252<br>71-118925529 |
| cg19111459 | chr1<br>0 | 1227087<br>39 | + | intergenic | none | Island  | chr10:1227085<br>10-122708899 |
| cg07998396 | chr1<br>0 | 1300085<br>59 | - | intergenic | none | Island  | chr10:1300085<br>58-130009620 |
| cg20099104 | chr1<br>0 | 1303396<br>69 | + | intergenic | none | Island  | chr10:1303395<br>26-130339777 |
| cg25446309 | chr1<br>0 | 1317702<br>23 | + | intergenic | none | Island  | chr10:1317611<br>69-131771696 |
| cg05825559 | chr1<br>0 | 1332525<br>19 | + | intergenic | none | OpenSea |                               |
| cg15344220 | chr1<br>1 | 8040551       | - | intergenic | none | Island  | chr11:8040409-<br>8041558     |
| cg13569486 | chr1<br>1 | 8290738       | - | intergenic | none | S_Shore | chr11:8289532-<br>8290322     |
| cg00589305 | chr1<br>1 | 1936762<br>1  | - | intergenic | none | Island  | chr11:1936665<br>3-19368234   |
| cg06619621 | chr1<br>1 | 3235474<br>2  | + | intergenic | none | N_Shore | chr11:3235476<br>0-32355484   |
| cg08214423 | chr1<br>1 | 3235495<br>8  | - | intergenic | none | Island  | chr11:3235476<br>0-32355484   |
| cg19908556 | chr1<br>1 | 3235502<br>2  | - | intergenic | none | Island  | chr11:3235476<br>0-32355484   |
| cg24573719 | chr1<br>1 | 4360003<br>2  | - | intergenic | none | N_Shore | chr11:4360071<br>2-43601409   |
| cg04067139 | chr1<br>1 | 5867316<br>7  | - | intergenic | none | Island  | chr11:5867285<br>1-58673288   |
| cg21825879 | chr1<br>1 | 9195845<br>8  | - | intergenic | none | Island  | chr11:9195763<br>5-91960290   |
| cg17432267 | chr1<br>1 | 1223114<br>46 | + | intergenic | none | OpenSea |                               |
| cg14917395 | chr1<br>1 | 1233008<br>49 | - | intergenic | none | N_Shore | chr11:1233010<br>49-123302149 |
| cg13945107 | chr1<br>1 | 1239472<br>30 | + | intergenic | none | OpenSea |                               |
| cg17945233 | chr1<br>1 | 1247133<br>94 | + | intergenic | none | Island  | chr11:1247130<br>05-124713395 |
| cg23152235 | chr1<br>1 | 1338372<br>65 | + | intergenic | none | OpenSea |                               |
| cg06807966 | chr1<br>2 | 4274034       | + | intergenic | none | Island  | chr12:4273819-<br>4274491     |
| cg25500050 | chr1<br>2 | 8171633       | + | intergenic | none | Island  | chr12:8171336-<br>8171790     |
| cg06598091 | chr1<br>2 | 1165360<br>0  | + | intergenic | none | Island  | chr12:1165323<br>2-11653775   |
| cg25134647 | chr1<br>2 | 2545499<br>0  | - | intergenic | none | OpenSea |                               |
| cg05131696 | chr1<br>2 | 3149932<br>0  | - | intergenic | none | OpenSea |                               |
| cg13990926 | chr1<br>2 | 5413344<br>7  | - | intergenic | none | S_Shore | chr12:5413214<br>8-54132353   |
| cg06858186 | chr1<br>2 | 5414492<br>1  | + | intergenic | none | Island  | chr12:5414456<br>2-54145470   |
| cg10792302 | chr1<br>2 | 5437601<br>9  | - | intergenic | none | N_Shelf | chr12:5437869<br>6-54380102   |
| cg03719428 | chr1<br>2 | 5437609<br>4  | + | intergenic | none | N_Shelf | chr12:5437869<br>6-54380102   |

|            |           |               |   |            |      |         |                               |
|------------|-----------|---------------|---|------------|------|---------|-------------------------------|
| cg03030717 | chr1<br>2 | 6521806<br>9  | - | intergenic | none | N_Shore | chr12:6521824<br>5-65219143   |
| cg04797725 | chr1<br>2 | 7771932<br>6  | - | intergenic | none | Island  | chr12:7771845<br>3-77719440   |
| cg20893031 | chr1<br>2 | 1083064<br>67 | - | intergenic | none | OpenSea |                               |
| cg14835517 | chr1<br>2 | 1139174<br>17 | - | intergenic | none | Island  | chr12:1139173<br>94-113918107 |
| cg24675150 | chr1<br>2 | 1192121<br>60 | - | intergenic | none | Island  | chr12:1192121<br>10-119212393 |
| cg18235050 | chr1<br>2 | 1266760<br>48 | - | intergenic | none | Island  | chr12:1266755<br>61-126676195 |
| cg15532640 | chr1<br>2 | 1295545<br>66 | - | intergenic | none | OpenSea |                               |
| cg14657728 | chr1<br>2 | 1304987<br>01 | + | intergenic | none | OpenSea |                               |
| cg07546255 | chr1<br>2 | 1312001<br>34 | + | intergenic | none | Island  | chr12:1311998<br>24-131200157 |
| cg14197169 | chr1<br>2 | 1312003<br>94 | + | intergenic | none | N_Shore | chr12:1312005<br>09-131200726 |
| cg15698568 | chr1<br>2 | 1312007<br>25 | + | intergenic | none | Island  | chr12:1312005<br>09-131200726 |
| cg11453719 | chr1<br>3 | 2855205<br>2  | - | intergenic | none | Island  | chr13:2855151<br>4-28552973   |
| cg19716887 | chr1<br>3 | 4678589<br>7  | + | intergenic | none | OpenSea |                               |
| cg05359130 | chr1<br>4 | 2922897<br>0  | + | intergenic | none | OpenSea |                               |
| cg25566568 | chr1<br>4 | 3699500<br>9  | + | intergenic | none | S_Shore | chr14:3699348<br>8-36994488   |
| cg16539957 | chr1<br>4 | 3806687<br>3  | - | intergenic | none | N_Shore | chr14:3806744<br>6-38069207   |
| cg19578835 | chr1<br>4 | 3806762<br>2  | - | intergenic | none | Island  | chr14:3806744<br>6-38069207   |
| cg21731375 | chr1<br>4 | 3806774<br>2  | + | intergenic | none | Island  | chr14:3806744<br>6-38069207   |
| cg15425541 | chr1<br>4 | 6111875<br>1  | - | intergenic | none | S_Shelf | chr14:6111410<br>2-61116552   |
| cg21495612 | chr1<br>4 | 9634225<br>0  | + | intergenic | none | Island  | chr14:9634220<br>9-96343570   |
| cg15156226 | chr1<br>4 | 1020310<br>29 | + | intergenic | none | Island  | chr14:1020259<br>89-102031567 |
| cg18823007 | chr1<br>4 | 1037454<br>32 | + | intergenic | none | Island  | chr14:1037452<br>32-103746271 |
| cg02979001 | chr1<br>4 | 1053104<br>21 | + | intergenic | none | Island  | chr14:1053096<br>90-105310500 |
| cg10832239 | chr1<br>4 | 1061837<br>70 | - | intergenic | none | N_Shore | chr14:1061857<br>41-106186041 |
| cg13562462 | chr1<br>5 | 2411474<br>4  | - | intergenic | none | OpenSea |                               |
| cg18139256 | chr1<br>5 | 2632749<br>6  | - | intergenic | none | Island  | chr15:2632749<br>5-26327896   |
| cg16263224 | chr1<br>5 | 2632789<br>5  | + | intergenic | none | Island  | chr15:2632749<br>5-26327896   |
| cg26134913 | chr1<br>5 | 2632804<br>9  | + | intergenic | none | S_Shore | chr15:2632749<br>5-26327896   |
| cg23804921 | chr1<br>5 | 3086117<br>2  | + | intergenic | none | N_Shelf | chr15:3086478<br>2-30865586   |
| cg04657205 | chr1<br>5 | 3480705<br>0  | + | intergenic | none | Island  | chr15:3480649<br>0-34807382   |
| cg24381412 | chr1<br>5 | 4599678<br>7  | + | intergenic | none | S_Shore | chr15:4599645<br>3-45996735   |
| cg01663018 | chr1<br>5 | 5309777<br>7  | - | intergenic | none | Island  | chr15:5309756<br>1-53098476   |
| cg12036633 | chr1<br>5 | 6375895<br>8  | - | intergenic | none | OpenSea |                               |
| cg12002303 | chr1<br>5 | 6811347<br>8  | - | intergenic | none | Island  | chr15:6811324<br>1-68113520   |



|            |       |          |   |            |                   |         |                         |
|------------|-------|----------|---|------------|-------------------|---------|-------------------------|
| cg26338453 | chr15 | 82340023 | + | intergenic | none              | S_Shore | chr15:82335472-82339937 |
| cg27196768 | chr15 | 98971673 | - | intergenic | none              | Island  | chr15:98971490-98971876 |
| cg20065768 | chr16 | 29796685 | + | intergenic | none              | Island  | chr16:29796361-29796757 |
| cg08394412 | chr16 | 50875140 | - | intergenic | none              | Island  | chr16:50875063-50875322 |
| cg08529345 | chr16 | 54971700 | + | intergenic | none              | Island  | chr16:54970301-54972846 |
| cg03426023 | chr16 | 54972078 | + | intergenic | none              | Island  | chr16:54970301-54972846 |
| cg01317772 | chr16 | 55405200 | + | intergenic | none              | OpenSea |                         |
| cg00274640 | chr16 | 88238863 | + | intergenic | none              | S_Shore | chr16:88237669-88237893 |
| cg08103988 | chr17 | 6558365  | - | intergenic | none              | Island  | chr17:6558221-6558441   |
| cg04264908 | chr17 | 35303330 | - | intergenic | none              | Island  | chr17:35303284-35303572 |
| cg17964505 | chr17 | 36609863 | - | intergenic | none              | Island  | chr17:36609705-36610320 |
| cg08848774 | chr17 | 43047733 | + | intergenic | none              | Island  | chr17:43047547-43047954 |
| cg02622647 | chr17 | 43578911 | + | intergenic | none              | OpenSea |                         |
| cg11361827 | chr17 | 45867446 | + | intergenic | none              | Island  | chr17:45867103-45867744 |
| cg20401567 | chr17 | 46619555 | + | intergenic | none              | N_Shore | chr17:46620367-46621373 |
| cg01469027 | chr17 | 46714130 | + | intergenic | none              | Island  | chr17:46713926-46714131 |
| cg14689219 | chr17 | 58217357 | + | intergenic | none              | Island  | chr17:58216793-58217515 |
| cg01781617 | chr17 | 60216199 | - | intergenic | none              | Island  | chr17:60214775-60216785 |
| cg20242280 | chr17 | 64826184 | - | intergenic | none              | OpenSea |                         |
| cg21000227 | chr17 | 70216183 | + | intergenic | none              | OpenSea |                         |
| cg17300544 | chr17 | 75369091 | + | intergenic | promoter_and_body | Island  | chr17:75368688-75370506 |
| cg27591450 | chr17 | 75525004 | - | intergenic | none              | Island  | chr17:75524589-75525152 |
| cg12865552 | chr17 | 77721631 | + | intergenic | none              | Island  | chr17:77721246-77722497 |
| cg02159489 | chr17 | 79459563 | - | intergenic | none              | S_Shelf | chr17:79454734-79455823 |
| cg03152033 | chr18 | 4453856  | + | intergenic | none              | N_Shore | chr18:4453969-4455647   |
| cg07897451 | chr18 | 44778083 | + | intergenic | none              | Island  | chr18:44777632-44778084 |
| cg11749010 | chr18 | 47794623 | - | intergenic | none              | Island  | chr18:47794450-47794996 |
| cg07064197 | chr19 | 32715640 | - | intergenic | none              | Island  | chr19:32715384-32715800 |
| cg04319276 | chr19 | 42445244 | + | intergenic | none              | Island  | chr19:42444020-42445255 |
| cg03241649 | chr19 | 44405924 | + | intergenic | none              | Island  | chr19:44405817-44406053 |
| cg26027796 | chr19 | 55962686 | - | intergenic | none              | Island  | chr19:55962482-55964247 |
| cg10925433 | chr20 | 25065524 | + | intergenic | none              | Island  | chr20:25063838-25065525 |
| cg09775533 | chr20 | 32857151 | - | intergenic | none              | Island  | chr20:32856659-32857248 |
| cg16661628 | chr20 | 32857227 | + | intergenic | none              | Island  | chr20:32856659-32857248 |

|            |           |               |   |                |                   |         |                              |
|------------|-----------|---------------|---|----------------|-------------------|---------|------------------------------|
| cg25508217 | chr2<br>0 | 4493742<br>6  | + | intergenic     | none              | S_Shore | chr20:4493593<br>2-44937310  |
| cg19499754 | chr2<br>0 | 5491915<br>5  | + | intergenic     | none              | Island  | chr20:5491903<br>6-54919357  |
| cg11251113 | chr2<br>0 | 5491923<br>9  | + | intergenic     | none              | Island  | chr20:5491903<br>6-54919357  |
| cg05059291 | chr2<br>0 | 6170336<br>2  | + | intergenic     | none              | N_Shore | chr20:6170352<br>6-61704022  |
| cg24606762 | chr2<br>0 | 6180697<br>2  | + | intergenic     | none              | Island  | chr20:6180625<br>4-61810867  |
| cg09200260 | chr2<br>1 | 3657753<br>9  | + | intergenic     | none              | OpenSea |                              |
| cg05306070 | chr2<br>1 | 4577029<br>8  | - | intergenic     | none              | OpenSea |                              |
| cg02184772 | chr2<br>1 | 4706302<br>8  | + | intergenic     | none              | Island  | chr21:4706177<br>3-47064308  |
| cg13466481 | chr2<br>2 | 1784984<br>8  | + | intergenic     | none              | Island  | chr22:1784947<br>4-17850733  |
| cg00944631 | chr2<br>2 | 2046494<br>7  | + | intergenic     | none              | S_Shelf | chr22:2045926<br>7-20461473  |
| cg02038168 | chr2<br>2 | 3978448<br>1  | - | intergenic     | none              | Island  | chr22:3978435<br>4-39785104  |
| cg24399712 | chr2<br>2 | 3978479<br>6  | - | intergenic     | none              | Island  | chr22:3978435<br>4-39785104  |
| cg07370646 | chr2<br>2 | 4231087<br>4  | + | intergenic     | none              | Island  | chr22:4231005<br>7-42311669  |
| cg27175294 | chr2<br>2 | 4231103<br>9  | + | intergenic     | none              | Island  | chr22:4231005<br>7-42311669  |
| cg10214827 | chr2<br>2 | 5006486<br>7  | + | intergenic     | none              | Island  | chr22:5006465<br>5-50064984  |
| cg04056343 | chr1<br>6 | 7137080       | - | A2BP1          | body              | OpenSea |                              |
| cg00590139 | chr1<br>6 | 7354254       | + | A2BP1          | body              | N_Shore | chr16:7354333-<br>7354608    |
| cg17960051 | chr7      | 8725767<br>3  | - | ABCB1; RUNDC3B | promoter          | Island  | chr7:87256958-<br>87258444   |
| cg11981631 | chr1<br>1 | 1749796<br>7  | - | ABCC8          | body              | Island  | chr11:1749746<br>3-17498626  |
| cg05280794 | chr1<br>7 | 1040653       | - | ABR            | promoter_and_body | OpenSea |                              |
| cg16968596 | chr1<br>5 | 8934662<br>9  | + | ACAN           | promoter          | Island  | chr15:8934604<br>3-89347203  |
| cg18061904 | chr2      | 1584541<br>10 | + | ACVR1C         | promoter_and_body | Island  | chr2:15845379<br>9-158454111 |
| cg21442003 | chr2      | 1584542<br>43 | - | ACVR1C         | promoter_and_body | S_Shore | chr2:15845379<br>9-158454111 |
| cg02725069 | chr5      | 1570028<br>17 | + | ADAM19         | promoter          | Island  | chr5:15700217<br>4-157003182 |
| cg07781332 | chr5      | 1287966<br>96 | - | ADAMTS19       | body              | Island  | chr5:12879550<br>3-128797417 |
| cg08232905 | chr4      | 7343403<br>5  | + | ADAMTS3        | body              | Island  | chr4:73433783-<br>73434289   |
| cg13643796 | chr4      | 7343420<br>9  | - | ADAMTS3        | body              | Island  | chr4:73433783-<br>73434289   |
| cg15102770 | chr4      | 7343459<br>1  | + | ADAMTS3        | promoter          | N_Shore | chr4:73434855-<br>73435321   |
| cg11243196 | chr4      | 7343485<br>6  | - | ADAMTS3        | promoter          | Island  | chr4:73434855-<br>73435321   |
| cg13684379 | chr1<br>0 | 1511173       | - | ADARB2         | body              | OpenSea |                              |
| cg20759084 | chr5      | 7395875       | - | ADCY2          | promoter          | Island  | chr5:7394986-<br>7397022     |
| cg02978184 | chr3      | 1231677<br>70 | - | ADCY5          | promoter          | Island  | chr3:12316621<br>8-123168567 |
| cg13483026 | chr3      | 1231679<br>73 | - | ADCY5          | promoter          | Island  | chr3:12316621<br>8-123168567 |
| cg20165074 | chr7      | 3109181<br>3  | + | ADCYAP1R1      | promoter          | Island  | chr7:31091717-<br>31093077   |

|            |      |           |           |              |                   |                   |                           |
|------------|------|-----------|-----------|--------------|-------------------|-------------------|---------------------------|
| cg17617930 | chr7 | 31091825  | +         | ADCYAP1R1    | promoter          | Island            | chr7:31091717-31093077    |
| cg02263377 | chr1 | 105195816 | -         | ADSSL1       | promoter_and_body | OpenSea           |                           |
| cg16260421 | chr1 | 50489319  | +         | AGBL4        | body              | N_Shore           | chr1:50489417-50489846    |
| cg03038003 | chr1 | 49242900  | +         | AGBL4; BEND5 | promoter_and_body | S_Shore           | chr1:49242371-49242810    |
| cg07790169 | chr1 | 49242932  | +         | AGBL4; BEND5 | promoter_and_body | S_Shore           | chr1:49242371-49242810    |
| cg24730157 | chr1 | 984428    | -         | AGRN         | body              | Island            | chr1:984206-984429        |
| cg12065138 | chr1 | 4771201   | -         | AJAP1        | body              | N_Shore           | chr1:4771652-4772545      |
| cg17484154 | chr1 | 77747875  | -         | AK5          | promoter_and_body | Island            | chr1:77747314-77748224    |
| cg02099814 | chr1 | 77748190  | -         | AK5          | promoter_and_body | Island            | chr1:77747314-77748224    |
| cg21359747 | chr1 | 101420636 | -         | ALDH1A3      | body              | Island            | chr15:101419261-101421133 |
| cg07034362 | chr3 | 125899552 | -         | ALDH1L1      | promoter          | Island            | chr3:125898662-125899568  |
| cg14163665 | chr2 | 30144579  | +         | ALK          | promoter          | Island            | chr2:30142831-30144624    |
| cg11207534 | chr8 | 41686438  | +         | ANK1         | body              | Island            | chr8:41685748-41686674    |
| cg16129172 | chr8 | 41686467  | +         | ANK1         | body              | Island            | chr8:41685748-41686674    |
| cg26530758 | chr8 | 41754060  | +         | ANK1         | promoter_and_body | Island            | chr8:41753340-41755250    |
| cg21101720 | chr1 | 27940509  | -         | ANKRD13B     | body              | Island            | chr17:27939298-27940770   |
| cg26828839 | chr1 | 2         | 6054749   | +            | ANO2              | body              | OpenSea                   |
| cg22710306 | chr1 | 5         | 90358103  | +            | ANPEP             | promoter          | Island                    |
| cg02518161 | chr2 | 0         | 6924040   | +            | ANTXR1            | promoter_and_body | Island                    |
| cg02304863 | chr2 | 9         | 6924042   | +            | ANTXR1            | promoter_and_body | Island                    |
| cg11078738 | chr2 | 3         | 6924045   | +            | ANTXR1            | promoter_and_body | Island                    |
| cg14383422 | chr2 | 62        | 2014509   | +            | AOX1              | body              | Island                    |
| cg13334650 | chr1 | 1         | 6440065   | -            | APBB1             | promoter          | Island                    |
| cg05475934 | chr1 | 0         | 26727318  | -            | APBB1IP           | promoter_and_body | Island                    |
| cg03306486 | chr1 | 9         | 1467952   | +            | APC2              | body              | Island                    |
| cg21406100 | chr1 | 1         | 110582247 | +            | ARHGAP20          | body              | Island                    |
| cg15044384 | chr1 | 9         | 1811866   | -            | ARRDC2            | promoter_and_body | N_Shore                   |
| cg00086670 | chr1 | 0         | 104629122 | -            | AS3MT             | promoter          | Island                    |
| cg26866482 | chr1 | 2         | 103351443 | -            | ASCL1             | promoter          | N_Shore                   |
| cg20034091 | chr1 | 8         | 31158527  | +            | ASXL3             | promoter          | OpenSea                   |
| cg12361352 | chr1 | 8         | 31158540  | +            | ASXL3             | promoter_and_body | OpenSea                   |
| cg27109877 | chr1 | 8         | 31158549  | +            | ASXL3             | promoter_and_body | OpenSea                   |
| cg22237200 | chr1 | 7         | 7555298   | +            | ATP1B2            | body              | Island                    |
| cg02770054 | chr1 | 9         | 36049123  | -            | ATP4A             | body              | Island                    |

|                |           |               |   |                  |                   |         |                               |
|----------------|-----------|---------------|---|------------------|-------------------|---------|-------------------------------|
| cg047518<br>11 | chr2      | 7119244<br>5  | + | ATP6V1B1         | none              | Island  | chr2:71192094-<br>71192495    |
| cg236354<br>29 | chr1<br>0 | 1168524<br>70 | + | ATRNL1           | promoter          | Island  | chr10:1168522<br>61-116854094 |
| cg237643<br>81 | chr1<br>0 | 1168526<br>87 | - | ATRNL1           | promoter          | Island  | chr10:1168522<br>61-116854094 |
| cg185428<br>42 | chr3      | 6385791<br>4  | + | ATXN7            | promoter          | OpenSea |                               |
| cg170271<br>95 | chr7      | 6906409<br>3  | - | AUTS2            | promoter_and_body | Island  | chr7:69062374-<br>69065037    |
| cg140651<br>27 | chr2<br>0 | 3063238       | - | AVP              | none              | Island  | chr20:3063005-<br>3064146     |
| cg230859<br>12 | chr1<br>2 | 6354552<br>3  | + | AVPR1A           | promoter_and_body | S_Shore | chr12:6354363<br>6-63544967   |
| cg056007<br>40 | chr1<br>2 | 5802601<br>0  | + | B4GALNT1         | promoter          | Island  | chr12:5802566<br>1-58027056   |
| cg128461<br>39 | chr1<br>7 | 7937224<br>2  | - | BAHCC1           | promoter          | Island  | chr17:7936680<br>6-79374742   |
| cg071393<br>30 | chr8      | 1435915<br>96 | - | BAI1             | body              | Island  | chr8:14359156<br>7-143592674  |
| cg140311<br>78 | chr6      | 6934442<br>3  | + | BAI3             | promoter          | N_Shore | chr6:69345216-<br>69345483    |
| cg127903<br>24 | chr6      | 6994314<br>0  | - | BAI3             | body              | OpenSea |                               |
| cg137325<br>89 | chr9      | 1354573<br>39 | + | BARHL1           | promoter          | Island  | chr9:13545516<br>4-135458586  |
| cg141922<br>91 | chr9      | 1354654<br>35 | - | BARHL1           | none              | Island  | chr9:13546458<br>6-135466240  |
| cg143064<br>51 | chr5      | 1721877<br>8  | + | BASP1; LOC285696 | promoter          | Island  | chr5:17217788-<br>17219021    |
| cg038740<br>92 | chr2      | 6078041<br>5  | - | BCL11A           | promoter_and_body | N_Shore | chr2:60781019-<br>60782284    |
| cg012256<br>98 | chr1<br>1 | 2774235<br>5  | + | BDNF             | promoter_and_body | N_Shore | chr11:2774347<br>2-27744564   |
| cg254579<br>56 | chr1<br>1 | 2774366<br>4  | + | BDNF             | promoter          | Island  | chr11:2774347<br>2-27744564   |
| cg016264<br>59 | chr6      | 5682077<br>8  | - | BEND6; DST       | promoter          | S_Shore | chr6:56818873-<br>56820308    |
| cg004658<br>41 | chr8      | 6549445<br>1  | + | BHLHE22          | body              | Island  | chr8:65492935-<br>65494452    |
| cg100737<br>23 | chr7      | 3394421<br>3  | - | BMPER            | promoter          | Island  | chr7:33943665-<br>33945509    |
| cg035330<br>05 | chr7      | 3394435<br>9  | - | BMPER            | promoter          | Island  | chr7:33943665-<br>33945509    |
| cg139738<br>13 | chr7      | 3394492<br>4  | + | BMPER            | promoter          | Island  | chr7:33943665-<br>33945509    |
| cg175614<br>35 | chr7      | 3394492<br>7  | + | BMPER            | promoter          | Island  | chr7:33943665-<br>33945509    |
| cg043894<br>26 | chr9      | 1687110<br>6  | - | BNC2             | promoter          | Island  | chr9:16870123-<br>16872020    |
| cg105293<br>87 | chr3      | 1129311<br>94 | + | BOC              | promoter          | Island  | chr3:11293043<br>7-112931506  |
| cg123232<br>74 | chr1<br>8 | 3483460<br>5  | + | BRUNOL4          | body              | Island  | chr18:3483355<br>4-34834606   |
| cg172271<br>56 | chr1<br>8 | 3514600<br>1  | - | BRUNOL4          | promoter          | Island  | chr18:3514490<br>7-35147628   |
| cg250232<br>75 | chr1<br>8 | 3514645<br>0  | - | BRUNOL4          | promoter          | Island  | chr18:3514490<br>7-35147628   |
| cg232434<br>63 | chr1<br>8 | 3514645<br>4  | - | BRUNOL4          | promoter          | Island  | chr18:3514490<br>7-35147628   |
| cg179731<br>64 | chr1<br>8 | 3514659<br>1  | + | BRUNOL4          | promoter          | Island  | chr18:3514490<br>7-35147628   |
| cg240410<br>78 | chr1<br>1 | 1113838<br>89 | + | BTG4; MIR34C     | promoter          | Island  | chr11:1113831<br>68-111383892 |
| cg105403<br>64 | chr1<br>0 | 2178353<br>9  | - | C10orf114        | none              | Island  | chr10:2178319<br>8-21786420   |
| cg033975<br>75 | chr1<br>0 | 2363351<br>8  | + | C10orf67         | body              | OpenSea |                               |

|            |            |               |   |                           |                   |         |                               |
|------------|------------|---------------|---|---------------------------|-------------------|---------|-------------------------------|
| cg11473876 | chr1<br>1  | 1092928<br>03 | - | C11orf87                  | promoter          | N_Shore | chr11:1092935<br>19-109294983 |
| cg11649795 | chr1<br>1  | 1092954<br>91 | + | C11orf87                  | none              | S_Shore | chr11:1092935<br>19-109294983 |
| cg10606490 | chr1<br>1  | 1113854<br>50 | - | C11orf88                  | promoter          | Island  | chr11:1113853<br>37-111385712 |
| cg25782847 | chr1<br>1  | 1113854<br>61 | - | C11orf88                  | promoter          | Island  | chr11:1113853<br>37-111385712 |
| cg00238770 | chr1<br>2  | 6809215       | + | C12orf53                  | promoter          | Island  | chr12:6809214-<br>6809816     |
| cg12376068 | chr1<br>2  | 6809512       | - | C12orf53                  | promoter          | Island  | chr12:6809214-<br>6809816     |
| cg23833588 | chr1<br>3  | 4696158<br>3  | + | C13orf18                  | promoter_and_body | Island  | chr13:4696068<br>4-46961670   |
| cg13455704 | chr1<br>3  | 3687175<br>4  | - | C13orf38                  | promoter_and_body | Island  | chr13:3687166<br>7-36872059   |
| cg15167956 | chr1<br>3  | 3687194<br>8  | - | C13orf38                  | promoter_and_body | Island  | chr13:3687166<br>7-36872059   |
| cg07139509 | chr1<br>4  | 7003871<br>7  | + | C14orf162                 | promoter          | Island  | chr14:7003810<br>8-70040302   |
| cg02273846 | chr1<br>4  | 2924282<br>3  | - | C14orf23                  | body              | N_Shore | chr14:2924340<br>3-29243763   |
| cg13001868 | chr1<br>7  | 4333922<br>3  | - | C17orf46;<br>LOC100133991 | promoter_and_body | Island  | chr17:4333912<br>4-43339832   |
| cg04992638 | chr1<br>7  | 4333932<br>8  | + | C17orf46;<br>LOC100133991 | promoter_and_body | Island  | chr17:4333912<br>4-43339832   |
| cg13958426 | chr1<br>37 | 1693966<br>37 | + | C1orf114                  | promoter_and_body | Island  | chr1:16939662<br>1-169396869  |
| cg00002719 | chr1<br>06 | 1693967<br>06 | + | C1orf114                  | promoter          | Island  | chr1:16939662<br>1-169396869  |
| cg08047907 | chr1<br>58 | 1693968<br>58 | - | C1orf114                  | promoter          | Island  | chr1:16939662<br>1-169396869  |
| cg17319142 | chr2<br>81 | 1199165<br>81 | + | C1QL2                     | promoter          | Island  | chr2:11991412<br>6-119916663  |
| cg24124029 | chr2<br>0  | 9495572       | - | C20orf103                 | body              | Island  | chr20:9495253-<br>9495597     |
| cg08582485 | chr2<br>0  | 2255751<br>8  | - | C20orf56                  | body              | Island  | chr20:2255751<br>7-22559240   |
| cg05840533 | chr2<br>0  | 3175594<br>3  | + | C20orf70                  | promoter          | OpenSea |                               |
| cg03364108 | chr2<br>2  | 2489079<br>4  | + | C22orf45; UPB1            | promoter          | Island  | chr22:2489041<br>2-24891453   |
| cg17968795 | chr2<br>6  | 9955340<br>6  | - | C2orf55                   | promoter          | Island  | chr2:99552185-<br>99553831    |
| cg04787024 | chr2<br>2  | 9955344<br>2  | - | C2orf55                   | promoter          | Island  | chr2:99552185-<br>99553831    |
| cg05037927 | chr2<br>7  | 6137211<br>7  | - | C2orf74                   | promoter          | OpenSea |                               |
| cg16328106 | chr2<br>8  | 6137213<br>8  | - | C2orf74                   | promoter          | OpenSea |                               |
| cg19790321 | chr2<br>5  | 6137216<br>5  | + | C2orf74                   | promoter          | OpenSea |                               |
| cg24757310 | chr2<br>6  | 6137222<br>6  | - | C2orf74                   | promoter          | OpenSea |                               |
| cg18158151 | chr2<br>6  | 6137225<br>6  | - | C2orf74                   | promoter_and_body | OpenSea |                               |
| cg10580144 | chr2<br>6  | 6137231<br>6  | - | C2orf74                   | promoter_and_body | OpenSea |                               |
| cg13888593 | chr2<br>0  | 7464247<br>0  | - | C2orf81                   | body              | Island  | chr2:74641733-<br>74643350    |
| cg15059608 | chr3<br>3  | 6230500<br>3  | - | C3orf14                   | promoter          | S_Shore | chr3:62304514-<br>62304780    |
| cg22751696 | chr3<br>7  | 6230514<br>7  | - | C3orf14                   | promoter          | S_Shore | chr3:62304514-<br>62304780    |
| cg08145590 | chr3<br>61 | 1194221<br>61 | + | C3orf15                   | body              | Island  | chr3:11942185<br>5-119422334  |
| cg16146432 | chr3<br>20 | 1679672<br>20 | - | C3orf50                   | promoter          | N_Shore | chr3:16796724<br>6-167968130  |

|            |       |           |   |          |                   |         |                           |
|------------|-------|-----------|---|----------|-------------------|---------|---------------------------|
| cg13304297 | chr3  | 167968368 | - | C3orf50  | body              | S_Shore | chr3:167967246-167968130  |
| cg02509058 | chr5  | 2753746   | + | C5orf38  | body              | Island  | chr5:2748368-2757024      |
| cg12539796 | chr5  | 7850203   | + | C5orf49  | body              | Island  | chr5:7849945-7850439      |
| cg02064106 | chr6  | 165722858 | + | C6orf118 | body              | OpenSea |                           |
| cg23146534 | chr7  | 99149191  | + | C7orf38  | promoter          | N_Shore | chr7:99149508-99149807    |
| cg14913925 | chr7  | 99149239  | - | C7orf38  | promoter          | N_Shore | chr7:99149508-99149807    |
| cg03566418 | chr8  | 13424080  | + | C8orf48  | promoter          | OpenSea |                           |
| cg19805005 | chr17 | 50234775  | + | CA10     | body              | N_Shore | chr17:50235175-50236466   |
| cg23010302 | chr17 | 58227265  | + | CA4      | promoter          | Island  | chr17:58227241-58227720   |
| cg19104475 | chr22 | 30116328  | + | CABP7    | promoter          | Island  | chr22:30116081-30117160   |
| cg18011401 | chr19 | 13617366  | + | CACNA1A  | promoter          | S_Shore | chr19:13616752-13617267   |
| cg27555529 | chr19 | 13617518  | + | CACNA1A  | promoter          | S_Shore | chr19:13616752-13617267   |
| cg16427096 | chr16 | 1202468   | - | CACNA1H  | promoter          | Island  | chr16:1202414-1204624     |
| cg01151699 | chr22 | 37099259  | - | CACNG2   | promoter          | N_Shore | chr22:37099471-37099711   |
| cg10355837 | chr17 | 64961440  | + | CACNG4   | body              | Island  | chr17:64961007-64962321   |
| cg02229775 | chr17 | 64961442  | + | CACNG4   | body              | Island  | chr17:64961007-64962321   |
| cg19786084 | chr17 | 64961747  | - | CACNG4   | body              | Island  | chr17:64961007-64962321   |
| cg08164556 | chr17 | 64961914  | - | CACNG4   | body              | Island  | chr17:64961007-64962321   |
| cg03910065 | chr11 | 115372874 | + | CADM1    | body              | N_Shore | chr11:115373574-115375881 |
| cg10043753 | chr11 | 115374739 | + | CADM1    | body              | Island  | chr11:115373574-115375881 |
| cg22207272 | chr11 | 115375703 | - | CADM1    | promoter          | Island  | chr11:115373574-115375881 |
| cg24621982 | chr3  | 85008061  | - | CADM2    | promoter          | N_Shore | chr3:85008284-85008837    |
| cg03951219 | chr1  | 159141440 | + | CADM3    | promoter_and_body | Island  | chr1:159141202-159141718  |
| cg20276156 | chr7  | 93204739  | - | CALCR    | promoter          | S_Shore | chr7:93204085-93204381    |
| cg03098937 | chr3  | 49907095  | + | CAMKV    | promoter          | Island  | chr3:49906737-49907482    |
| cg06756211 | chr1  | 223936799 | - | CAPN2    | body              | Island  | chr1:223936342-223937044  |
| cg19598416 | chr1  | 223936812 | - | CAPN2    | body              | Island  | chr1:223936342-223937044  |
| cg18391209 | chr1  | 223747670 | + | CAPN8    | body              | S_Shelf | chr1:223741965-223744525  |
| cg11008866 | chr3  | 121902442 | - | CASR     | promoter          | N_Shore | chr3:121902742-121903645  |
| cg27537628 | chr19 | 56159288  | + | CCDC106  | promoter_and_body | Island  | chr19:56159257-56159937   |
| cg08496742 | chr19 | 56159485  | + | CCDC106  | promoter_and_body | Island  | chr19:56159257-56159937   |
| cg13480357 | chr2  | 219906406 | + | CCDC108  | promoter          | S_Shore | chr2:219906107-219906328  |
| cg04342821 | chr3  | 42814752  | + | CCDC13   | promoter          | Island  | chr3:42814567-42814893    |
| cg01825831 | chr3  | 42814880  | + | CCDC13   | promoter          | Island  | chr3:42814567-42814893    |

|            |       |           |   |                  |                   |         |                           |
|------------|-------|-----------|---|------------------|-------------------|---------|---------------------------|
| cg20647888 | chr10 | 13043954  | + | CCDC3            | promoter          | S_Shore | chr10:13043094-13043781   |
| cg20166714 | chr12 | 113592444 | - | CCDC42B          | body              | Island  | chr12:113592203-113592620 |
| cg23947326 | chr19 | 46504128  | - | CCDC61           | body              | Island  | chr19:46504108-46504330   |
| cg01923218 | chr11 | 93063888  | - | CCDC67           | promoter_and_body | Island  | chr11:93063598-93064076   |
| cg05991743 | chr2  | 56412380  | - | CCDC85A          | body              | Island  | chr2:56410865-56412539    |
| cg04292718 | chr1  | 208084456 | + | CD34             | promoter_and_body | Island  | chr1:208084098-208084513  |
| cg15994026 | chr4  | 15780306  | - | CD38             | body              | Island  | chr4:15779998-15780729    |
| cg26624576 | chr16 | 65156605  | - | CDH11            | promoter          | Island  | chr16:65154656-65157664   |
| cg13390630 | chr20 | 44803246  | - | CDH22            | body              | Island  | chr20:44803064-44803662   |
| cg17771031 | chr20 | 44875334  | - | CDH22            | body              | Island  | chr20:44875253-44875454   |
| cg01763575 | chr20 | 44875431  | - | CDH22            | body              | Island  | chr20:44875253-44875454   |
| cg14120010 | chr18 | 63418583  | - | CDH7             | promoter          | Island  | chr18:63417775-63418640   |
| cg19451845 | chr2  | 219824051 | + | CDK5R2           | promoter          | N_Shore | chr2:219824151-219825864  |
| cg14831838 | chr2  | 219824308 | - | CDK5R2           | promoter          | Island  | chr2:219824151-219825864  |
| cg16531271 | chr2  | 219824324 | - | CDK5R2           | promoter          | Island  | chr2:219824151-219825864  |
| cg14910495 | chr2  | 219824329 | - | CDK5R2           | promoter          | Island  | chr2:219824151-219825864  |
| cg26682866 | chr2  | 219824395 | - | CDK5R2           | promoter          | Island  | chr2:219824151-219825864  |
| cg04026675 | chr9  | 21974514  | + | CDKN2A           | body              | N_Shore | chr9:21974578-21975306    |
| cg13601799 | chr9  | 21974704  | + | CDKN2A           | body              | Island  | chr9:21974578-21975306    |
| cg23967742 | chr10 | 90966701  | - | CH25H            | body              | N_Shore | chr10:90967555-90967900   |
| cg17984375 | chr10 | 90967612  | - | CH25H            | promoter          | Island  | chr10:90967555-90967900   |
| cg12276513 | chr1  | 6208879   | - | CHD5             | body              | Island  | chr1:6208716-6209039      |
| cg00282347 | chr1  | 6241040   | + | CHD5             | promoter          | Island  | chr1:6241031-6241251      |
| cg21645164 | chr12 | 133464327 | + | CHFR             | promoter          | Island  | chr12:133463807-133464858 |
| cg01295518 | chr3  | 238392    | - | CHL1             | promoter          | Island  | chr3:238391-240140        |
| cg22348992 | chr20 | 61979563  | + | CHRNA4           | body              | Island  | chr20:61979255-61979573   |
| cg05529816 | chr17 | 4802735   | - | CHRNE; C17orf107 | promoter_and_body | Island  | chr17:4802265-4805402     |
| cg09426197 | chr11 | 45687281  | + | CHST1            | promoter          | Island  | chr11:45686160-45687495   |
| cg03853987 | chr2  | 101034279 | + | CHST10           | promoter          | Island  | chr2:101033606-101034296  |
| cg07399369 | chr3  | 142838082 | - | CHST2            | promoter          | Island  | chr3:142837885-142840838  |
| cg00995327 | chr3  | 142838847 | - | CHST2            | promoter_and_body | Island  | chr3:142837885-142840838  |
| cg27275352 | chr19 | 19652066  | - | CILP2            | body              | S_Shore | chr19:19650683-19651274   |
| cg21389743 | chr3  | 170136499 | - | CLDN11           | promoter          | Island  | chr3:170136242-170137886  |
| cg23853484 | chr19 | 7795988   | + | CLEC4G           | body              | Island  | chr19:7794793-7796410     |

|            |           |               |   |         |                   |         |                               |
|------------|-----------|---------------|---|---------|-------------------|---------|-------------------------------|
| cg19200589 | chr2<br>1 | 3604160<br>5  | + | CLIC6   | promoter          | Island  | chr21:3604130<br>5-36043224   |
| cg25737323 | chr2      | 2933810<br>0  | - | CLIP4   | promoter          | Island  | chr2:29337983-<br>29338909    |
| cg13257636 | chr2      | 2933810<br>9  | - | CLIP4   | promoter          | Island  | chr2:29337983-<br>29338909    |
| cg23428985 | chr2      | 2933811<br>3  | - | CLIP4   | promoter          | Island  | chr2:29337983-<br>29338909    |
| cg23255835 | chr2      | 2933812<br>1  | - | CLIP4   | promoter          | Island  | chr2:29337983-<br>29338909    |
| cg02774855 | chr2      | 2933863<br>6  | - | CLIP4   | promoter          | Island  | chr2:29337983-<br>29338909    |
| cg05038216 | chr2      | 2933909<br>1  | + | CLIP4   | promoter          | S_Shore | chr2:29337983-<br>29338909    |
| cg22610211 | chr3      | 1396542<br>64 | - | CLSTN2  | body              | Island  | chr3:13965343<br>0-139655115  |
| cg20129210 | chr1<br>3 | 1005471<br>92 | - | CLYBL   | none              | Island  | chr13:1005471<br>72-100547431 |
| cg21781979 | chr1<br>3 | 1005472<br>92 | + | CLYBL   | none              | Island  | chr13:1005471<br>72-100547431 |
| cg11195797 | chr1<br>3 | 1005473<br>31 | - | CLYBL   | none              | Island  | chr13:1005471<br>72-100547431 |
| cg18958126 | chr1<br>3 | 1005473<br>67 | - | CLYBL   | none              | Island  | chr13:1005471<br>72-100547431 |
| cg09233013 | chr1<br>6 | 6663841<br>2  | - | CMTM3   | promoter_and_body | Island  | chr16:6663825<br>4-66639561   |
| cg26560414 | chr1<br>6 | 6663843<br>3  | - | CMTM3   | promoter_and_body | Island  | chr16:6663825<br>4-66639561   |
| cg13518298 | chr9      | 3458971<br>1  | + | CNTFR   | promoter_and_body | Island  | chr9:34589113-<br>34591978    |
| cg27229407 | chr1      | 1035726<br>15 | + | COL11A1 | body              | OpenSea |                               |
| cg18473652 | chr6      | 7591412<br>2  | - | COL12A1 | promoter          | N_Shore | chr6:75914705-<br>75916387    |
| cg21080140 | chr6      | 7057705<br>9  | - | COL19A1 | promoter          | Island  | chr6:70576974-<br>70577572    |
| cg17840061 | chr6      | 7057747<br>8  | - | COL19A1 | promoter          | Island  | chr6:70576974-<br>70577572    |
| cg24909466 | chr1<br>3 | 1109610<br>69 | + | COL4A2  | body              | Island  | chr13:1109609<br>24-110961143 |
| cg27507687 | chr3      | 4863248<br>4  | - | COL7A1  | body              | Island  | chr3:48631882-<br>48632901    |
| cg26011014 | chr1      | 4078300<br>3  | - | COL9A2  | promoter          | Island  | chr1:40782220-<br>40783145    |
| cg06283976 | chr1<br>8 | 4993393       | + | COLEC12 | body              | Island  | chr18:499315-<br>500722       |
| cg15424739 | chr1<br>9 | 1890166<br>6  | + | COMP    | body              | Island  | chr19:1889903<br>7-18902284   |
| cg08154437 | chr1<br>9 | 1700865<br>0  | - | CPAMD8  | body              | Island  | chr19:1700710<br>1-17008857   |
| cg07295964 | chr5      | 1752239<br>82 | + | CPLX2   | promoter          | Island  | chr5:17522360<br>9-175224679  |
| cg26121591 | chr5      | 1752985<br>64 | - | CPLX2   | promoter_and_body | Island  | chr5:17529851<br>5-175300066  |
| cg24729690 | chr5      | 1753002<br>17 | + | CPLX2   | promoter          | S_Shore | chr5:17529851<br>5-175300066  |
| cg12855522 | chr6      | 3680820<br>7  | - | CPNE5   | promoter          | Island  | chr6:36807678-<br>36808808    |
| cg09557387 | chr1      | 2078183<br>95 | + | CR1L    | promoter          | Island  | chr1:20781838<br>9-207818952  |
| cg13177758 | chr1<br>5 | 7863257<br>2  | - | CRABP1  | promoter          | N_Shore | chr15:7863266<br>9-78633108   |
| cg16703647 | chr1<br>5 | 7863259<br>2  | - | CRABP1  | promoter          | N_Shore | chr15:7863266<br>9-78633108   |
| cg23337754 | chr1<br>5 | 7863285<br>9  | - | CRABP1  | body              | Island  | chr15:7863266<br>9-78633108   |
| cg17133183 | chr1<br>5 | 7863286<br>1  | - | CRABP1  | body              | Island  | chr15:7863266<br>9-78633108   |



|            |       |           |   |                        |                   |         |                          |
|------------|-------|-----------|---|------------------------|-------------------|---------|--------------------------|
| cg01864564 | chr1  | 152488269 | + | CRCT1                  | none              | Island  | chr1:152487978-152488270 |
| cg11093548 | chr7  | 28450001  | + | CREB5                  | promoter          | Island  | chr7:28448716-28450028   |
| cg04856689 | chr17 | 43862032  | - | CRHR1                  | body              | Island  | chr17:43860684-43862928  |
| cg24353392 | chr17 | 43862247  | + | CRHR1                  | body              | Island  | chr17:43860684-43862928  |
| cg22350070 | chr2  | 79738639  | + | CTNNA2                 | promoter          | N_Shore | chr2:79739696-79740243   |
| cg01546568 | chr2  | 79740322  | + | CTNNA2                 | promoter_and_body | S_Shore | chr2:79739696-79740243   |
| cg16971380 | chr15 | 48483080  | + | CTXN2                  | promoter          | OpenSea |                          |
| cg06048524 | chr10 | 44880542  | - | CXCL12                 | promoter          | Island  | chr10:44879714-44882391  |
| cg17267805 | chr10 | 44880545  | - | CXCL12                 | promoter          | Island  | chr10:44879714-44882391  |
| cg15574312 | chr17 | 74533845  | + | CYGB                   | promoter          | Island  | chr17:74533281-74534566  |
| cg07781162 | chr17 | 74533951  | - | CYGB                   | promoter          | Island  | chr17:74533281-74534566  |
| cg19249708 | chr17 | 74533969  | - | CYGB                   | promoter          | Island  | chr17:74533281-74534566  |
| cg00958884 | chr17 | 74533976  | - | CYGB                   | promoter          | Island  | chr17:74533281-74534566  |
| cg16332610 | chr15 | 74658547  | + | CYP11A1                | promoter_and_body | Island  | chr15:74658038-74658574  |
| cg11034245 | chr2  | 72375000  | - | CYP26B1                | promoter          | Island  | chr2:72371121-72375004   |
| cg01114088 | chr4  | 50211111  | - | CYTL1                  | body              | Island  | chr4:5021003-5021329     |
| cg14135551 | chr6  | 39760416  | - | DAAM2                  | promoter          | Island  | chr6:39760066-39760426   |
| cg19717595 | chr1  | 57887655  | + | DAB1                   | promoter          | N_Shore | chr1:57887963-57890637   |
| cg05919360 | chr1  | 57889417  | + | DAB1                   | promoter          | Island  | chr1:57887963-57890637   |
| cg03384825 | chr1  | 57889604  | + | DAB1                   | promoter          | Island  | chr1:57887963-57890637   |
| cg20272619 | chr1  | 57890317  | - | DAB1                   | promoter          | Island  | chr1:57887963-57890637   |
| cg07173275 | chr1  | 57890636  | + | DAB1                   | promoter          | Island  | chr1:57887963-57890637   |
| cg18242712 | chr11 | 20182324  | + | DBX1                   | promoter          | Island  | chr11:20181200-20182325  |
| cg13186327 | chr12 | 45444895  | - | DBX2                   | promoter          | Island  | chr12:45444202-45445386  |
| cg27352765 | chr3  | 98620662  | + | DCBLD2                 | promoter          | Island  | chr3:98620131-98620910   |
| cg02464093 | chr3  | 98620857  | + | DCBLD2                 | promoter          | Island  | chr3:98620131-98620910   |
| cg16657397 | chr3  | 186079367 | + | DGKG                   | promoter          | Island  | chr3:186078710-186080111 |
| cg08675193 | chr3  | 186080245 | - | DGKG                   | promoter          | S_Shore | chr3:186078710-186080111 |
| cg14254745 | chr1  | 26758306  | - | DHDDS                  | promoter          | N_Shore | chr1:26758492-26758856   |
| cg10086212 | chr12 | 49484169  | + | DHH                    | body              | Island  | chr12:49483601-49484255  |
| cg24804517 | chr20 | 61560953  | + | DIDO1                  | promoter          | Island  | chr20:61560433-61560954  |
| cg23340935 | chr2  | 218354150 | - | DIRC3                  | body              | OpenSea |                          |
| cg07700514 | chr16 | 56228467  | - | DKFZP434H168;<br>GNAO1 | promoter_and_body | S_Shelf | chr16:56224731-56224980  |
| cg02667667 | chr16 | 56228505  | - | DKFZP434H168;<br>GNAO1 | promoter_and_body | S_Shelf | chr16:56224731-56224980  |

|            |       |           |   |              |                   |         |                           |
|------------|-------|-----------|---|--------------|-------------------|---------|---------------------------|
| cg20864389 | chr11 | 84431970  | - | DLG2         | body              | OpenSea |                           |
| cg26228266 | chr1  | 35351340  | - | DLGAP3       | body              | Island  | chr1:35350878-35351854    |
| cg23493510 | chr17 | 48049275  | - | DLX4         | promoter_and_body | Island  | chr17:48048953-48050616   |
| cg09150117 | chr7  | 96653867  | - | DLX5         | body              | Island  | chr7:96653467-96654199    |
| cg05663341 | chr7  | 96634660  | - | DLX6AS; DLX6 | promoter_and_body | Island  | chr7:96634622-96634915    |
| cg23563008 | chr7  | 96635624  | + | DLX6AS; DLX6 | body              | Island  | chr7:96635458-96635749    |
| cg07027116 | chr1  | 65731738  | - | DNAJC6       | body              | Island  | chr1:65731411-65731849    |
| cg04399751 | chr1  | 171810376 | - | DNM3         | promoter          | N_Shore | chr1:171810467-171811325  |
| cg08862890 | chr5  | 169064451 | - | DOCK2        | body              | Island  | chr5:169064270-169064702  |
| cg19991022 | chr20 | 53091920  | - | DOK5         | promoter          | Island  | chr20:53091733-53092993   |
| cg16764494 | chr11 | 117667862 | + | DSCAML1      | body              | Island  | chr11:117666634-117668141 |
| cg25010118 | chr18 | 65184398  | + | DSEL         | promoter          | S_Shore | chr18:65183237-65184014   |
| cg00119057 | chr18 | 32073462  | - | DTNA         | promoter_and_body | Island  | chr18:32073444-32074292   |
| cg05293775 | chr8  | 33457483  | + | DUSP26       | promoter          | Island  | chr8:33456915-33457515    |
| cg04217450 | chr5  | 158526693 | + | EBF1         | promoter_and_body | N_Shore | chr5:158527374-158527983  |
| cg26525127 | chr2  | 233350365 | + | ECEL1        | body              | Island  | chr2:233350278-233352974  |
| cg07446677 | chr10 | 11784190  | + | ECHDC3       | promoter          | N_Shore | chr10:11784407-11784937   |
| cg02806452 | chr2  | 233499070 | + | EFHD1        | body              | Island  | chr2:233497826-233499727  |
| cg07852757 | chr10 | 64575442  | + | EGR2         | body              | Island  | chr10:64574660-64578778   |
| cg00981472 | chr2  | 31456761  | - | EHD3         | promoter          | Island  | chr2:31456740-31457653    |
| cg18444347 | chr2  | 31456775  | + | EHD3         | promoter          | Island  | chr2:31456740-31457653    |
| cg25840208 | chr2  | 31457043  | - | EHD3         | promoter_and_body | Island  | chr2:31456740-31457653    |
| cg15947096 | chr7  | 37488835  | + | ELMO1        | promoter          | S_Shore | chr7:37487354-37488672    |
| cg14378848 | chr6  | 53212618  | - | ELOVL5       | promoter          | Island  | chr6:53212617-53214043    |
| cg25514947 | chr6  | 53212650  | + | ELOVL5       | promoter          | Island  | chr6:53212617-53214043    |
| cg27599958 | chr6  | 53213028  | - | ELOVL5       | promoter          | Island  | chr6:53212617-53214043    |
| cg14048874 | chr7  | 101006573 | - | EMID2        | body              | Island  | chr7:101005899-101007443  |
| cg16781647 | chr2  | 73151595  | - | EMX1         | body              | Island  | chr2:73151200-73152060    |
| cg03339065 | chr10 | 119304583 | + | EMX2; EMX2OS | promoter_and_body | Island  | chr10:119301321-119305368 |
| cg24188415 | chr10 | 119304586 | + | EMX2; EMX2OS | promoter_and_body | Island  | chr10:119301321-119305368 |
| cg12894449 | chr10 | 119304104 | + | EMX2OS; EMX2 | body              | Island  | chr10:119301321-119305368 |
| cg12418535 | chr2  | 119607192 | + | EN1          | promoter          | N_Shore | chr2:119607378-119607910  |
| cg03677003 | chr13 | 44359996  | - | ENOX1        | promoter          | Island  | chr13:44359858-44361696   |
| cg10482596 | chr13 | 44360259  | - | ENOX1        | promoter          | Island  | chr13:44359858-44361696   |

|            |       |           |   |         |                   |         |                           |
|------------|-------|-----------|---|---------|-------------------|---------|---------------------------|
| cg17186025 | chr13 | 44360736  | - | ENOX1   | promoter          | Island  | chr13:44359858-44361696   |
| cg09320746 | chr13 | 44361019  | - | ENOX1   | promoter_and_body | Island  | chr13:44359858-44361696   |
| cg19025435 | chr13 | 44361624  | - | ENOX1   | promoter          | Island  | chr13:44359858-44361696   |
| cg04281219 | chr6  | 46138847  | - | ENPP5   | promoter          | OpenSea |                           |
| cg04403917 | chr7  | 37960974  | - | EPDR1   | body              | Island  | chr7:37960316-37961046    |
| cg13231700 | chr2  | 222435709 | + | EPHA4   | body              | N_Shore | chr2:222436034-222438941  |
| cg17194182 | chr7  | 100318154 | + | EPO     | promoter          | Island  | chr7:100318106-100318684  |
| cg20893717 | chr7  | 100318190 | + | EPO     | promoter          | Island  | chr7:100318106-100318684  |
| cg10864074 | chr7  | 100318194 | + | EPO     | promoter          | Island  | chr7:100318106-100318684  |
| cg01692340 | chr7  | 100318319 | + | EPO     | promoter          | Island  | chr7:100318106-100318684  |
| cg00011346 | chr2  | 213403859 | + | ERBB4   | promoter          | Island  | chr2:213402180-213403867  |
| cg23444468 | chr3  | 56502054  | + | ERC2    | promoter          | Island  | chr3:56501868-56502345    |
| cg08065241 | chr3  | 56502265  | + | ERC2    | promoter          | Island  | chr3:56501868-56502345    |
| cg09059904 | chr5  | 76012757  | - | F2R     | body              | S_Shore | chr5:76011120-76012292    |
| cg07689907 | chr11 | 61582574  | - | FADS1   | body              | Island  | chr11:61582573-61584728   |
| cg23760165 | chr11 | 61595485  | - | FADS2   | promoter          | Island  | chr11:61594996-61596710   |
| cg25303599 | chr11 | 61595807  | - | FADS2   | promoter_and_body | Island  | chr11:61594996-61596710   |
| cg03514404 | chr7  | 143579665 | + | FAM115A | promoter          | N_Shelf | chr7:143582125-143582610  |
| cg01244015 | chr2  | 225266843 | + | FAM124B | promoter          | OpenSea |                           |
| cg09682311 | chr7  | 23053758  | + | FAM126A | promoter_and_body | Island  | chr7:23052971-23054002    |
| cg01587630 | chr7  | 23053820  | + | FAM126A | promoter          | Island  | chr7:23052971-23054002    |
| cg13002945 | chr7  | 23053827  | + | FAM126A | promoter          | Island  | chr7:23052971-23054002    |
| cg05129610 | chr7  | 23053937  | - | FAM126A | promoter          | Island  | chr7:23052971-23054002    |
| cg07956515 | chr7  | 23053981  | + | FAM126A | promoter          | Island  | chr7:23052971-23054002    |
| cg09006985 | chr7  | 23054001  | + | FAM126A | promoter          | Island  | chr7:23052971-23054002    |
| cg03291960 | chr7  | 23054024  | - | FAM126A | promoter          | S_Shore | chr7:23052971-23054002    |
| cg07800384 | chr2  | 289254    | - | FAM150B | promoter          | Island  | chr2:287353-290099        |
| cg19839798 | chr13 | 108519318 | - | FAM155A | promoter_and_body | Island  | chr13:108519292-108521063 |
| cg09551776 | chr2  | 75788246  | + | FAM176A | promoter          | Island  | chr2:75787717-75788312    |
| cg27207796 | chr4  | 17783322  | - | FAM184B | promoter          | Island  | chr4:17782642-17783624    |
| cg11545314 | chr3  | 43021348  | + | FAM198A | body              | Island  | chr3:43020702-43021354    |
| cg03186486 | chr3  | 68980947  | + | FAM19A4 | promoter          | Island  | chr3:68980783-68982035    |
| cg01697732 | chr17 | 66597500  | + | FAM20A  | promoter          | Island  | chr17:66596072-66597578   |
| cg13618967 | chr7  | 212539    | - | FAM20C  | body              | OpenSea |                           |

|                |           |               |   |                  |                   |         |                               |
|----------------|-----------|---------------|---|------------------|-------------------|---------|-------------------------------|
| cg003524<br>17 | chr3      | 1944089<br>01 | + | FAM43A           | body              | Island  | chr3:19440644<br>0-194409045  |
| cg121243<br>86 | chr1      | 1904447<br>76 | + | FAM5C            | promoter          | OpenSea |                               |
| cg030988<br>14 | chr6      | 2491130<br>8  | - | FAM65B           | promoter          | S_Shore | chr6:24910626-<br>24911285    |
| cg110832<br>76 | chr6      | 2491131<br>3  | - | FAM65B           | promoter          | S_Shore | chr6:24910626-<br>24911285    |
| cg066369<br>71 | chr6      | 2491155<br>3  | - | FAM65B           | promoter          | S_Shore | chr6:24910626-<br>24911285    |
| cg218687<br>74 | chr1      | 1661342<br>82 | - | FAM78B           | body              | Island  | chr1:16613425<br>8-166136448  |
| cg092796<br>15 | chr1      | 1661344<br>10 | + | FAM78B           | body              | Island  | chr1:16613425<br>8-166136448  |
| cg022299<br>93 | chr1      | 1661346<br>99 | + | FAM78B           | body              | Island  | chr1:16613425<br>8-166136448  |
| cg051186<br>38 | chr4      | 1262373<br>71 | + | FAT4             | promoter          | Island  | chr4:12623589<br>5-126238930  |
| cg107310<br>73 | chr4      | 1262373<br>73 | + | FAT4             | promoter          | Island  | chr4:12623589<br>5-126238930  |
| cg274369<br>95 | chr1<br>6 | 743998        | - | FBXL16           | none              | Island  | chr16:743924-<br>745943       |
| cg075515<br>45 | chr1<br>9 | 3946631<br>3  | - | FBXO17           | promoter_and_body | Island  | chr19:3946584<br>6-39466403   |
| cg147300<br>85 | chr1<br>9 | 3952254<br>8  | - | FBXO27           | body              | Island  | chr19:3952226<br>4-39523227   |
| cg142102<br>87 | chr1      | 1616956<br>59 | - | FCRLB            | body              | Island  | chr1:16169563<br>7-161697298  |
| cg090352<br>84 | chr2      | 2198501<br>23 | + | FEV              | promoter_and_body | Island  | chr2:21984891<br>9-219850541  |
| cg142147<br>06 | chr1<br>3 | 1030529<br>43 | + | FGF14            | body              | Island  | chr13:1030523<br>61-103052944 |
| cg182107<br>32 | chr1<br>1 | 6951854<br>5  | - | FGF19            | body              | Island  | chr11:6951784<br>0-69519929   |
| cg241991<br>12 | chr1<br>1 | 6959032<br>8  | + | FGF4             | promoter          | Island  | chr11:6958882<br>6-69590546   |
| cg058941<br>24 | chr4      | 8118679<br>5  | - | FGF5             | promoter          | N_Shore | chr4:81187494-<br>81187913    |
| cg103002<br>29 | chr8      | 3832499<br>3  | + | FGFR1            | promoter          | N_Shore | chr8:38325091-<br>38326374    |
| cg044571<br>96 | chr2      | 1645932<br>64 | + | FIGN             | promoter          | Island  | chr2:16459291<br>7-164593511  |
| cg025265<br>22 | chr1<br>1 | 1285637<br>16 | - | FLI1             | promoter          | Island  | chr11:1285626<br>71-128565011 |
| cg184128<br>34 | chr2<br>0 | 6188529<br>1  | + | FLJ16779; NKAIN4 | promoter_and_body | Island  | chr20:6188464<br>4-61886387   |
| cg273977<br>87 | chr1<br>9 | 5055390<br>7  | + | FLJ26850         | promoter          | N_Shore | chr19:5055401<br>2-50554492   |
| cg225311<br>83 | chr1<br>9 | 5055445<br>1  | + | FLJ26850         | body              | Island  | chr19:5055401<br>2-50554492   |
| cg081743<br>73 | chr1<br>0 | 1029892<br>54 | - | FLJ41350; LBX1   | promoter          | Island  | chr10:1029841<br>82-102990063 |
| cg190466<br>97 | chr5      | 9291558<br>1  | + | FLJ42709         | body              | Island  | chr5:92914770-<br>92917337    |
| cg144211<br>80 | chr9      | 1328045<br>10 | + | FNBP1            | body              | Island  | chr9:13280427<br>9-132806003  |
| cg251792<br>91 | chr9      | 1328057<br>39 | - | FNBP1            | promoter          | Island  | chr9:13280427<br>9-132806003  |
| cg144659<br>00 | chr9      | 1328057<br>55 | - | FNBP1            | promoter          | Island  | chr9:13280427<br>9-132806003  |
| cg142473<br>32 | chr9      | 1328059<br>79 | - | FNBP1            | promoter          | Island  | chr9:13280427<br>9-132806003  |
| cg266867<br>32 | chr2<br>0 | 2256273<br>7  | - | FOXA2            | body              | Island  | chr20:2256273<br>6-22566104   |
| cg169631<br>44 | chr2<br>0 | 2256697<br>6  | - | FOXA2            | promoter          | Island  | chr20:2256682<br>1-22567055   |
| cg198094<br>99 | chr1      | 4788226<br>5  | + | FOXE3            | body              | Island  | chr1:47881896-<br>47883065    |

|            |       |           |   |             |                   |         |                           |
|------------|-------|-----------|---|-------------|-------------------|---------|---------------------------|
| cg15457058 | chr1  | 47882322  | + | FOXE3       | body              | Island  | chr1:47881896-47883065    |
| cg05555338 | chr16 | 86542864  | - | FOXF1       | promoter          | Island  | chr16:86541430-86545228   |
| cg23511613 | chr2  | 88752322  | + | FOXI3       | promoter          | Island  | chr2:88751335-88752865    |
| cg09650487 | chr10 | 14215771  | + | FRMD4A      | body              | OpenSea |                           |
| cg06830784 | chr2  | 183731824 | - | FRZB        | promoter          | Island  | chr2:183731819-183732093  |
| cg13355047 | chr19 | 4304554   | - | FSD1        | promoter          | Island  | chr19:4304542-4305122     |
| cg11398523 | chr19 | 50316423  | - | FUZ         | promoter_and_body | Island  | chr19:50316211-50316469   |
| cg10166205 | chr19 | 50316699  | + | FUZ         | promoter          | S_Shore | chr19:50316211-50316469   |
| cg18209212 | chr12 | 130646256 | + | FZD10       | promoter          | Island  | chr12:130645327-130648988 |
| cg25145765 | chr4  | 46391392  | - | GABRA2      | promoter_and_body | N_Shore | chr4:46391903-46392572    |
| cg23160016 | chr4  | 46391929  | - | GABRA2      | promoter_and_body | Island  | chr4:46391903-46392572    |
| cg11281641 | chr2  | 171674855 | + | GAD1        | promoter          | Island  | chr2:171672310-171675447  |
| cg06139006 | chr12 | 132682698 | + | GALNT9      | body              | Island  | chr12:132682572-132682895 |
| cg25686860 | chr3  | 128206949 | + | GATA2       | promoter          | Island  | chr3:128205495-128212274  |
| cg23520930 | chr3  | 128206967 | + | GATA2       | promoter          | Island  | chr3:128205495-128212274  |
| cg09024124 | chr3  | 128207255 | - | GATA2       | promoter_and_body | Island  | chr3:128205495-128212274  |
| cg13845982 | chr20 | 61051029  | - | GATA5       | promoter          | Island  | chr20:61049361-61051897   |
| cg20265733 | chr20 | 61051032  | - | GATA5       | promoter          | Island  | chr20:61049361-61051897   |
| cg02484469 | chr20 | 61051036  | - | GATA5       | promoter          | Island  | chr20:61049361-61051897   |
| cg14980983 | chr20 | 61051039  | - | GATA5       | promoter          | Island  | chr20:61049361-61051897   |
| cg16714055 | chr20 | 61051341  | - | GATA5       | promoter          | Island  | chr20:61049361-61051897   |
| cg11982072 | chr20 | 61051348  | - | GATA5       | promoter          | Island  | chr20:61049361-61051897   |
| cg24500900 | chr20 | 61051423  | - | GATA5       | promoter          | Island  | chr20:61049361-61051897   |
| cg08568720 | chr20 | 61051432  | - | GATA5       | promoter          | Island  | chr20:61049361-61051897   |
| cg23770904 | chr20 | 61051561  | - | GATA5       | promoter          | Island  | chr20:61049361-61051897   |
| cg14388488 | chr20 | 61051777  | - | GATA5       | promoter          | Island  | chr20:61049361-61051897   |
| cg03777459 | chr20 | 61051802  | - | GATA5       | promoter          | Island  | chr20:61049361-61051897   |
| cg14250833 | chr6  | 10882240  | - | GCM2        | promoter          | N_Shore | chr6:10882926-10883149    |
| cg14000361 | chr6  | 10882336  | + | GCM2        | promoter          | N_Shore | chr6:10882926-10883149    |
| cg09994356 | chr20 | 42875779  | - | GDAP1L1     | promoter          | Island  | chr20:42875764-42876184   |
| cg01778345 | chr1  | 118427435 | - | GDAP2       | body              | OpenSea |                           |
| cg03351460 | chr19 | 19007311  | + | GDF1; LASS1 | promoter          | Island  | chr19:19006031-19007546   |
| cg04110601 | chr10 | 48438724  | - | GDF10       | promoter_and_body | Island  | chr10:48438411-48439320   |
| cg07966910 | chr2  | 20866399  | - | GDF7        | promoter          | Island  | chr2:20865289-20867589    |

|                |      |               |   |                  |                   |         |                               |
|----------------|------|---------------|---|------------------|-------------------|---------|-------------------------------|
| cg037536<br>81 | chr2 | 2086650<br>0  | + | GDF7             | promoter_and_body | Island  | chr2:20865289-<br>20867589    |
| cg131079<br>75 | chr1 | 9294948<br>8  | + | GFI1             | promoter          | Island  | chr1:92945907-<br>92952609    |
| cg139448<br>38 | chr5 | 1797409<br>14 | - | GFPT2            | body              | Island  | chr5:17974071<br>0-179741121  |
| cg232484<br>24 | chr5 | 1797411<br>04 | + | GFPT2            | body              | Island  | chr5:17974071<br>0-179741121  |
| cg028913<br>14 | chr5 | 1797411<br>20 | + | GFPT2            | body              | Island  | chr5:17974071<br>0-179741121  |
| cg003477<br>57 | chr1 | 2076856<br>3  | - | GJB2             | promoter          | S_Shore | chr13:2076620<br>8-20767779   |
| cg170094<br>33 | chr9 | 6645686       | + | GLDC             | promoter_and_body | Island  | chr9:6645080-<br>6645975      |
| cg094056<br>12 | chr7 | 4227587<br>0  | + | GLI3             | promoter          | N_Shore | chr7:42276003-<br>42277850    |
| cg175309<br>77 | chr7 | 4227587<br>2  | + | GLI3             | promoter          | N_Shore | chr7:42276003-<br>42277850    |
| cg087128<br>66 | chr4 | 1579975<br>26 | - | GLRB             | promoter          | Island  | chr4:15799716<br>6-157997686  |
| cg067285<br>79 | chr1 | 5622490<br>6  | - | GNAO1; LOC283856 | promoter_and_body | Island  | chr16:5622473<br>1-56224980   |
| cg067142<br>84 | chr1 | 2358128<br>40 | + | GNG4             | promoter          | Island  | chr1:23581184<br>1-235814066  |
| cg202855<br>14 | chr1 | 2358134<br>44 | + | GNG4             | promoter          | Island  | chr1:23581184<br>1-235814066  |
| cg197013<br>78 | chr1 | 3473007<br>1  | + | GOLGA8A          | promoter          | S_Shore | chr15:3472878<br>7-34729495   |
| cg228213<br>24 | chr4 | 1769234<br>39 | - | GPM6A            | promoter_and_body | Island  | chr4:17692307<br>5-176923630  |
| cg175650<br>78 | chr1 | 2733472<br>3  | - | GPR12            | promoter_and_body | Island  | chr13:2733422<br>6-27335205   |
| cg096397<br>25 | chr1 | 1349012<br>0  | - | GPR123           | promoter          | Island  | chr10:1349011<br>98-134902619 |
| cg158257<br>86 | chr1 | 1349012<br>0  | - | GPR123           | promoter          | Island  | chr10:1349011<br>98-134902619 |
| cg080539<br>04 | chr1 | 2008589<br>6  | + | GPR139           | promoter          | S_Shore | chr16:2008470<br>7-20085305   |
| cg146157<br>84 | chr5 | 9495575<br>6  | + | GPR150           | promoter          | Island  | chr5:94955630-<br>94957244    |
| cg128645<br>97 | chr5 | 9495578<br>9  | - | GPR150           | promoter          | Island  | chr5:94955630-<br>94957244    |
| cg023204<br>54 | chr5 | 9495601<br>7  | + | GPR150           | body              | Island  | chr5:94955630-<br>94957244    |
| cg244934<br>46 | chr1 | 4021210<br>5  | - | GPR176           | body              | Island  | chr15:4021196<br>1-40213444   |
| cg017692<br>32 | chr6 | 1103002<br>18 | - | GPR6             | promoter          | Island  | chr6:11029936<br>5-110301267  |
| cg067118<br>31 | chr1 | 1882191<br>3  | - | GREB1L           | promoter          | Island  | chr18:1882138<br>3-18823349   |
| cg173124<br>92 | chr1 | 3301169<br>5  | + | GREM1            | promoter          | Island  | chr15:3300953<br>0-33011696   |
| cg099805<br>22 | chr1 | 1054818<br>1  | - | GRIA4            | body              | S_Shore | chr11:1054811<br>26-105481422 |
| cg030528<br>69 | chr1 | 8812629<br>0  | + | GRID1            | promoter          | Island  | chr10:8812292<br>4-88127364   |
| cg119825<br>83 | chr4 | 9322593<br>3  | - | GRID2            | body              | N_Shore | chr4:93226348-<br>93227007    |
| cg211877<br>69 | chr4 | 9322649<br>5  | - | GRID2            | body              | Island  | chr4:93226348-<br>93227007    |
| cg203888<br>23 | chr4 | 9322727<br>0  | - | GRID2            | body              | S_Shore | chr4:93226348-<br>93227007    |
| cg055779<br>02 | chr7 | 6576152       | - | GRID2IP          | body              | Island  | chr7:6575923-<br>6576389      |
| cg269888<br>95 | chr7 | 6576353       | + | GRID2IP          | body              | Island  | chr7:6575923-<br>6576389      |
| cg076420<br>43 | chr1 | 1027667<br>6  | + | GRIN2A           | promoter          | Island  | chr16:1027394<br>3-10277424   |

|            |       |           |   |                  |                   |         |                           |
|------------|-------|-----------|---|------------------|-------------------|---------|---------------------------|
| cg25067120 | chr7  | 126893287 | + | GRM8             | promoter          | Island  | chr7:126891300-126894205  |
| cg17159473 | chr7  | 126893890 | - | GRM8             | promoter          | Island  | chr7:126891300-126894205  |
| cg01163842 | chr14 | 95235125  | + | GSC              | body              | Island  | chr14:95234612-95236569   |
| cg10042799 | chr14 | 95236123  | - | GSC              | body              | Island  | chr14:95234612-95236569   |
| cg24506221 | chr1  | 110230401 | - | GSTM1            | promoter          | Island  | chr1:110230238-110230614  |
| cg23472215 | chr1  | 110282815 | + | GSTM3            | body              | Island  | chr1:110282351-110283306  |
| cg17163751 | chr10 | 71812596  | + | H2AFY2           | promoter_and_body | Island  | chr10:71812318-71813693   |
| cg26166804 | chr10 | 71812612  | + | H2AFY2           | promoter_and_body | Island  | chr10:71812318-71813693   |
| cg26976732 | chr16 | 216100    | - | HBM              | body              | Island  | chr16:214343-216720       |
| cg07523553 | chr1  | 17700661  | + | HCCA2; LOC402778 | promoter_and_body | Island  | chr11:1768979-1770712     |
| cg17394649 | chr6  | 29760164  | - | HCG4             | body              | Island  | chr6:29759946-29760903    |
| cg23244913 | chr6  | 29943401  | + | HCG9             | body              | N_Shore | chr6:29944402-29945169    |
| cg06710082 | chr6  | 29943408  | + | HCG9             | body              | N_Shore | chr6:29944402-29945169    |
| cg04623837 | chr6  | 29943414  | + | HCG9             | body              | N_Shore | chr6:29944402-29945169    |
| cg04109898 | chr6  | 29943455  | + | HCG9             | body              | N_Shore | chr6:29944402-29945169    |
| cg17639394 | chr6  | 29943480  | + | HCG9             | body              | N_Shore | chr6:29944402-29945169    |
| cg17326769 | chr20 | 30639705  | - | HCK              | promoter          | N_Shore | chr20:30639908-30640786   |
| cg04787432 | chr6  | 126071294 | - | HEY2             | body              | Island  | chr6:126068722-126071320  |
| cg09633973 | chr17 | 1957365   | - | HIC1             | promoter          | Island  | chr17:1952919-1962328     |
| cg17739038 | chr17 | 1957496   | + | HIC1             | promoter          | Island  | chr17:1952919-1962328     |
| cg14018363 | chr6  | 29911265  | - | HLA-A            | body              | Island  | chr6:29910202-29911367    |
| cg13524302 | chr6  | 33084798  | - | HLA-DPB2         | body              | Island  | chr6:33084740-33084995    |
| cg04315646 | chr6  | 33084922  | - | HLA-DPB2         | body              | Island  | chr6:33084740-33084995    |
| cg05337177 | chr6  | 33084928  | - | HLA-DPB2         | body              | Island  | chr6:33084740-33084995    |
| cg21588215 | chr6  | 32632937  | + | HLA-DQB1         | body              | Island  | chr6:32632158-32633027    |
| cg23967822 | chr6  | 32632961  | + | HLA-DQB1         | body              | Island  | chr6:32632158-32633027    |
| cg03403720 | chr6  | 32632970  | + | HLA-DQB1         | body              | Island  | chr6:32632158-32633027    |
| cg24593918 | chr6  | 32633157  | - | HLA-DQB1         | body              | S_Shore | chr6:32632158-32633027    |
| cg23464743 | chr6  | 32633163  | - | HLA-DQB1         | body              | S_Shore | chr6:32632158-32633027    |
| cg12109566 | chr6  | 30227986  | + | HLA-L            | body              | Island  | chr6:30227320-30228255    |
| cg18704691 | chr1  | 221052468 | - | HLX              | promoter          | Island  | chr1:221051966-221053673  |
| cg12405785 | chr1  | 221053409 | + | HLX              | body              | Island  | chr1:221051966-221053673  |
| cg18685408 | chr10 | 124895448 | + | HMX3             | promoter          | Island  | chr10:124894075-124897366 |
| cg06417478 | chr19 | 12876846  | - | HOKK2            | body              | N_Shore | chr19:12876889-12877108   |

|            |       |           |   |                  |                   |         |                          |
|------------|-------|-----------|---|------------------|-------------------|---------|--------------------------|
| cg04657146 | chr19 | 12876947  | + | HOOK2            | body              | Island  | chr19:12876889-12877108  |
| cg11738485 | chr19 | 12877000  | + | HOOK2            | body              | Island  | chr19:12876889-12877108  |
| cg23899408 | chr19 | 12877188  | - | HOOK2            | body              | S_Shore | chr19:12876889-12877108  |
| cg05311410 | chr7  | 27225523  | + | HOXA11AS; HOXA11 | promoter_and_body | Island  | chr7:27225050-27225629   |
| cg22943986 | chr7  | 27142700  | + | HOXA2            | promoter          | N_Shore | chr7:27143181-27143479   |
| cg07302069 | chr7  | 27196286  | + | HOXA7            | promoter_and_body | Island  | chr7:27195601-27196567   |
| cg13479204 | chr17 | 46641708  | + | HOXB3            | promoter          | Island  | chr17:46641534-46642110  |
| cg08151857 | chr17 | 46691820  | - | HOXB8            | body              | Island  | chr17:46691520-46692097  |
| cg25928579 | chr17 | 46692534  | - | HOXB8            | promoter          | S_Shore | chr17:46690390-46691055  |
| cg03107393 | chr17 | 46692553  | - | HOXB8            | promoter          | S_Shore | chr17:46690390-46691055  |
| cg03923561 | chr12 | 54447220  | + | HOXC4            | promoter          | N_Shore | chr12:54447744-54448091  |
| cg07266404 | chr12 | 54447584  | - | HOXC4            | promoter          | N_Shore | chr12:54447744-54448091  |
| cg22747076 | chr12 | 54447873  | + | HOXC4            | body              | Island  | chr12:54447744-54448091  |
| cg11746813 | chr12 | 54448090  | + | HOXC4            | body              | Island  | chr12:54447744-54448091  |
| cg21726284 | chr12 | 54402909  | + | HOXC8            | promoter_and_body | Island  | chr12:54402682-54403347  |
| cg05022306 | chr12 | 54403254  | + | HOXC8            | body              | Island  | chr12:54402682-54403347  |
| cg11418595 | chr2  | 177052486 | + | HOXD1            | promoter          | N_Shore | chr2:177052957-177054350 |
| cg14715697 | chr17 | 77127487  | + | HRNBP3           | promoter          | Island  | chr17:77127405-77127606  |
| cg10362542 | chr17 | 77179709  | - | HRNBP3           | promoter          | Island  | chr17:77178828-77180229  |
| cg12103626 | chr17 | 14204310  | - | HS3ST3B1         | promoter          | Island  | chr17:14204168-14207702  |
| cg12484686 | chr17 | 14204340  | - | HS3ST3B1         | promoter          | Island  | chr17:14204168-14207702  |
| cg03739411 | chr16 | 1968124   | - | HS3ST6           | body              | Island  | chr16:1967799-1968970    |
| cg23425970 | chr2  | 129076394 | + | HS6ST1           | promoter          | Island  | chr2:129075197-129077639 |
| cg24725522 | chr19 | 49339397  | + | HSD17B14         | body              | N_Shore | chr19:49340488-49340774  |
| cg06546677 | chr8  | 145537504 | + | HSF1             | body              | OpenSea |                          |
| cg07833420 | chr6  | 87647147  | + | HTR1E            | promoter_and_body | N_Shore | chr6:87647253-87647707   |
| cg04747634 | chr16 | 71264451  | + | HYDIN            | promoter          | Island  | chr16:71264360-71264659  |
| cg08597761 | chr16 | 71264545  | + | HYDIN            | promoter_and_body | Island  | chr16:71264360-71264659  |
| cg09918510 | chr16 | 71264579  | + | HYDIN            | promoter          | Island  | chr16:71264360-71264659  |
| cg02293437 | chr16 | 71264678  | + | HYDIN            | promoter          | S_Shore | chr16:71264360-71264659  |
| cg08160350 | chr4  | 996052    | + | IDUA             | body              | Island  | chr4:995482-997541       |
| cg13704548 | chr15 | 65714817  | + | IGDCC4           | body              | Island  | chr15:65714742-65715571  |
| cg17787134 | chr17 | 47073522  | - | IGF2BP1          | promoter          | Island  | chr17:47072820-47076042  |
| cg12314713 | chr17 | 47074576  | + | IGF2BP1          | promoter          | Island  | chr17:47072820-47076042  |



|            |       |           |   |         |                   |         |                          |
|------------|-------|-----------|---|---------|-------------------|---------|--------------------------|
| cg02782889 | chr17 | 47074637  | - | IGF2BP1 | promoter          | Island  | chr17:47072820-47076042  |
| cg02120774 | chr7  | 45961473  | - | IGFBP3  | promoter          | S_Shore | chr7:45960137-45961347   |
| cg18363918 | chr19 | 51829984  | - | IGLON5  | body              | N_Shore | chr19:51830064-51831145  |
| cg16120742 | chr7  | 50345049  | + | IKZF1   | promoter          | S_Shore | chr7:50342895-50343456   |
| cg20925841 | chr2  | 121104400 | + | INHBB   | body              | Island  | chr2:121101800-121104534 |
| cg09062550 | chr2  | 20350481  | + | INSM1   | body              | Island  | chr20:20344400-20350605  |
| cg07850604 | chr14 | 36003443  | + | INSM2   | promoter_and_body | Island  | chr14:36002598-36005013  |
| cg19115941 | chr12 | 187284    | + | IQSEC3  | promoter_and_body | Island  | chr12:186863-187610      |
| cg03609666 | chr19 | 49250439  | + | IZUMO1  | promoter          | N_Shelf | chr19:49253688-49254221  |
| cg10596483 | chr8  | 143751796 | - | JRK     | promoter          | S_Shore | chr8:143750759-143751448 |
| cg24634471 | chr8  | 143751801 | - | JRK     | promoter          | S_Shore | chr8:143750759-143751448 |
| cg09588271 | chr1  | 62784651  | - | KANK4   | promoter          | Island  | chr1:62784136-62785133   |
| cg14208112 | chr1  | 111149307 | + | KCNA2   | promoter          | Island  | chr1:111148983-111150186 |
| cg25281171 | chr1  | 111149507 | + | KCNA2   | promoter          | Island  | chr1:111148983-111150186 |
| cg12392473 | chr20 | 48099331  | - | KCNB1   | promoter          | Island  | chr20:48098512-48099560  |
| cg00755448 | chr8  | 73448779  | + | KCNB2   | promoter          | Island  | chr8:73448659-73449725   |
| cg18555069 | chr8  | 73449519  | + | KCNB2   | promoter          | Island  | chr8:73448659-73449725   |
| cg15774465 | chr8  | 73449524  | + | KCNB2   | promoter          | Island  | chr8:73448659-73449725   |
| cg27118761 | chr11 | 17756479  | + | KCNC1   | promoter          | Island  | chr11:17756056-17758286  |
| cg10203375 | chr1  | 211307178 | + | KCNH1   | body              | Island  | chr1:211306667-211307675 |
| cg12989934 | chr5  | 170108187 | - | KCNIP1  | body              | OpenSea |                          |
| cg03928539 | chr17 | 21279613  | - | KCNJ12  | promoter          | Island  | chr17:21279506-21281574  |
| cg18871020 | chr22 | 38851345  | + | KCNJ4   | promoter          | S_Shore | chr22:38850766-38851285  |
| cg25142308 | chr22 | 38851363  | + | KCNJ4   | promoter          | S_Shore | chr22:38850766-38851285  |
| cg02957576 | chr22 | 38851366  | + | KCNJ4   | promoter          | S_Shore | chr22:38850766-38851285  |
| cg22935149 | chr22 | 38851884  | + | KCNJ4   | promoter          | S_Shore | chr22:38850766-38851285  |
| cg12212555 | chr14 | 90526722  | - | KCNK13  | promoter          | Island  | chr14:90526696-90528951  |
| cg21231789 | chr14 | 90528199  | + | KCNK13  | promoter_and_body | Island  | chr14:90526696-90528951  |
| cg19584875 | chr14 | 90528213  | + | KCNK13  | promoter_and_body | Island  | chr14:90526696-90528951  |
| cg22669058 | chr14 | 90528371  | - | KCNK13  | promoter_and_body | Island  | chr14:90526696-90528951  |
| cg01717150 | chr8  | 140716495 | + | KCNK9   | promoter          | Island  | chr8:140714585-140718259 |
| cg09405661 | chr10 | 79397455  | + | KCNMA1  | promoter_and_body | Island  | chr10:79396095-79398495  |
| cg13070215 | chr8  | 133493171 | + | KCNQ3   | promoter          | Island  | chr8:133492398-133493586 |
| cg22308501 | chr8  | 133493424 | + | KCNQ3   | promoter          | Island  | chr8:133492398-133493586 |

|            |           |               |   |                 |                   |         |                               |
|------------|-----------|---------------|---|-----------------|-------------------|---------|-------------------------------|
| cg06206801 | chr1<br>8 | 2413137<br>9  | - | KCTD1           | promoter          | S_Shore | chr18:2412678<br>0-24131138   |
| cg00989765 | chr4      | 5599186<br>0  | + | KDR             | promoter          | Island  | chr4:55991402-<br>55992171    |
| cg25467973 | chr1      | 3663705       | - | KIAA0495        | promoter_and_body | Island  | chr1:3662963-<br>3664085      |
| cg25327452 | chr9      | 1000004<br>64 | - | KIAA1529        | promoter          | Island  | chr9:10000046<br>3-100000820  |
| cg01950665 | chr9      | 1000007<br>68 | - | KIAA1529        | promoter          | Island  | chr9:10000046<br>3-100000820  |
| cg19486070 | chr7      | 1626153       | + | KIAA1908        | body              | OpenSea |                               |
| cg11752586 | chr2      | 1496325<br>99 | - | KIF5C           | promoter          | N_Shore | chr2:14963268<br>2-149633882  |
| cg14986699 | chr2      | 1496327<br>05 | - | KIF5C           | promoter          | Island  | chr2:14963268<br>2-149633882  |
| cg17245188 | chr2      | 1496327<br>09 | - | KIF5C           | promoter          | Island  | chr2:14963268<br>2-149633882  |
| cg10457563 | chr6      | 3969315<br>9  | + | KIF6            | promoter_and_body | S_Shore | chr6:39692743-<br>39692966    |
| cg01138981 | chr6      | 3969336<br>0  | - | KIF6            | promoter          | S_Shore | chr6:39692743-<br>39692966    |
| cg19495969 | chr1<br>1 | 1264434<br>90 | + | KIRREL3         | body              | OpenSea |                               |
| cg09803407 | chr1<br>1 | 1268702<br>33 | + | KIRREL3         | body              | Island  | chr11:1268702<br>26-126870552 |
| cg06533629 | chr7      | 1304193<br>70 | - | KLF14           | promoter          | Island  | chr7:13041791<br>2-130419378  |
| cg08478189 | chr2      | 2080306<br>66 | - | KLF7            | promoter          | N_Shore | chr2:20803085<br>2-208031477  |
| cg26887632 | chr2      | 2080317<br>74 | - | KLF7            | promoter          | S_Shore | chr2:20803085<br>2-208031477  |
| cg16501308 | chr1<br>8 | 3035022<br>1  | - | KLHL14          | body              | Island  | chr18:3034969<br>0-30352302   |
| cg10999479 | chr2      | 2360897<br>5  | - | KLHL29          | promoter          | Island  | chr2:23607729-<br>23610124    |
| cg10909185 | chr1<br>1 | 7513973<br>6  | + | KLHL35          | body              | Island  | chr11:7513945<br>4-75139817   |
| cg15506157 | chr7      | 1391684<br>84 | + | KLRG2           | promoter          | Island  | chr7:13916748<br>0-139168712  |
| cg08131100 | chr7      | 1494116<br>52 | - | KRBA1           | promoter          | Island  | chr7:14941085<br>8-149412351  |
| cg00060320 | chr3      | 1343699<br>74 | + | KY              | promoter          | Island  | chr3:13436946<br>4-134370242  |
| cg12307306 | chr3      | 1343699<br>87 | + | KY              | promoter          | Island  | chr3:13436946<br>4-134370242  |
| cg06037943 | chr4      | 1090880<br>38 | - | LEF1; LOC641518 | promoter_and_body | Island  | chr4:10908774<br>7-109090407  |
| cg26679958 | chr4      | 1090885<br>73 | + | LEF1; LOC641518 | promoter_and_body | Island  | chr4:10908774<br>7-109090407  |
| cg24761507 | chr1<br>7 | 3529393<br>0  | + | LHX1            | promoter          | Island  | chr17:3529189<br>9-35300875   |
| cg04993975 | chr1<br>7 | 3529447<br>2  | - | LHX1            | promoter          | Island  | chr17:3529189<br>9-35300875   |
| cg05527869 | chr1<br>7 | 3529447<br>6  | - | LHX1            | promoter          | Island  | chr17:3529189<br>9-35300875   |
| cg10043865 | chr1<br>7 | 3529448<br>1  | - | LHX1            | promoter          | Island  | chr17:3529189<br>9-35300875   |
| cg10356613 | chr1<br>7 | 3529449<br>1  | - | LHX1            | promoter          | Island  | chr17:3529189<br>9-35300875   |
| cg05323725 | chr1<br>7 | 3529471<br>3  | + | LHX1            | promoter_and_body | Island  | chr17:3529189<br>9-35300875   |
| cg13817952 | chr9      | 1249904<br>56 | - | LHX6            | body              | Island  | chr9:12498774<br>3-124991086  |
| cg19411474 | chr1      | 7560022<br>4  | - | LHX8            | body              | N_Shore | chr1:75600674-<br>75601415    |
| cg09131629 | chr2      | 1284333<br>09 | + | LIMS2           | promoter          | Island  | chr2:12843301<br>0-128433490  |

|            |      |           |   |                        |                   |         |                           |
|------------|------|-----------|---|------------------------|-------------------|---------|---------------------------|
| cg07262244 | chr2 | 128433489 | + | LIMS2                  | promoter          | Island  | chr2:128433010-128433490  |
| cg18634211 | chr1 | 26737262  | - | LIN28                  | promoter          | Island  | chr1:26737246-26738148    |
| cg21842523 | chr1 | 82847461  | + | LMO1                   | body              | Island  | chr11:8284102-8285032     |
| cg06560887 | chr1 | 33890371  | + | LMO2                   | body              | Island  | chr11:33890357-33891495   |
| cg27590049 | chr1 | 165205199 | - | LMX1A                  | body              | Island  | chr1:165204501-165205507  |
| cg23944251 | chr1 | 25464719  | + | LOC100128811           | body              | Island  | chr10:25463756-25465639   |
| cg13704680 | chr1 | 77905298  | - | LOC100130522           | promoter          | Island  | chr18:77905297-77905566   |
| cg03048083 | chr1 | 43339497  | - | LOC100133991; C17orf46 | promoter_and_body | Island  | chr17:43339124-43339832   |
| cg09392940 | chr2 | 109745828 | + | LOC100287216; SH3RF3   | promoter_and_body | Island  | chr2:109744585-109746833  |
| cg03596016 | chr1 | 246952362 | - | LOC149134              | promoter          | Island  | chr1:246952214-246952511  |
| cg12877251 | chr8 | 9760880   | + | LOC157627              | promoter          | Island  | chr8:9760750-9761643      |
| cg15248835 | chr8 | 9761171   | + | LOC157627; MIR124-1    | promoter          | Island  | chr8:9760750-9761643      |
| cg18440199 | chr1 | 72665282  | - | LOC283392; TRHDE       | promoter_and_body | N_Shore | chr12:72665683-72667551   |
| cg01030121 | chr1 | 72667236  | - | LOC283392; TRHDE       | body              | Island  | chr12:72665683-72667551   |
| cg02954212 | chr1 | 56226350  | + | LOC283856; GNAO1       | promoter_and_body | Island  | chr16:56225255-56226351   |
| cg20062650 | chr1 | 43963907  | - | LOC387763              | promoter          | Island  | chr11:43963626-43966048   |
| cg04336379 | chr7 | 5111669   | - | LOC389458              | promoter          | Island  | chr7:5111620-5112088      |
| cg11216554 | chr1 | 124638983 | + | LOC399815; FAM24B      | promoter          | Island  | chr10:124638743-124639793 |
| cg25923450 | chr3 | 159944518 | - | LOC401097              | body              | S_Shore | chr3:159942916-159944431  |
| cg05085809 | chr1 | 46671083  | + | LOC404266; HOXB5       | promoter_and_body | Island  | chr17:46670522-46671458   |
| cg10153335 | chr1 | 46671293  | - | LOC404266; HOXB5       | promoter_and_body | Island  | chr17:46670522-46671458   |
| cg02293936 | chr1 | 46671298  | - | LOC404266; HOXB5       | promoter_and_body | Island  | chr17:46670522-46671458   |
| cg01774894 | chr1 | 46674395  | + | LOC404266; HOXB6       | body              | N_Shore | chr17:46675044-46675589   |
| cg24527560 | chr1 | 42863508  | + | LOC441666              | promoter          | S_Shore | chr10:42862953-42863216   |
| cg24598948 | chr1 | 42863539  | + | LOC441666              | promoter          | S_Shore | chr10:42862953-42863216   |
| cg03149565 | chr4 | 109092769 | - | LOC641518              | promoter_and_body | Island  | chr4:109092578-109092839  |
| cg12278467 | chr5 | 87971573  | - | LOC645323              | body              | Island  | chr5:87969960-87972070    |
| cg24631913 | chr5 | 87971905  | + | LOC645323              | body              | Island  | chr5:87969960-87972070    |
| cg07553626 | chr1 | 85359119  | + | LPAR3                  | promoter          | Island  | chr1:85358359-85359187    |
| cg02996869 | chr1 | 82267171  | + | LPHN2                  | promoter          | Island  | chr1:82265998-82269048    |
| cg20863963 | chr1 | 82268281  | - | LPHN2                  | promoter          | Island  | chr1:82265998-82269048    |
| cg04226724 | chr1 | 82268649  | - | LPHN2                  | promoter          | Island  | chr1:82265998-82269048    |
| cg04118610 | chr4 | 62707027  | - | LPHN3                  | body              | OpenSea |                           |
| cg00662122 | chr8 | 105601696 | - | LRP12                  | promoter          | Island  | chr8:105600453-105601704  |

|            |      |           |   |                                        |                   |         |                          |
|------------|------|-----------|---|----------------------------------------|-------------------|---------|--------------------------|
| cg08026618 | chr2 | 142888404 | + | LRP1B                                  | promoter_and_body | Island  | chr2:142887724-142888553 |
| cg21484213 | chr2 | 142888868 | + | LRP1B                                  | promoter_and_body | S_Shore | chr2:142887724-142888553 |
| cg11403874 | chr2 | 170218594 | + | LRP2                                   | body              | Island  | chr2:170218314-170219203 |
| cg13436799 | chr2 | 170218997 | + | LRP2                                   | promoter_and_body | Island  | chr2:170218314-170219203 |
| cg21645864 | chr2 | 170219019 | + | LRP2                                   | promoter_and_body | Island  | chr2:170218314-170219203 |
| cg16585827 | chr2 | 170219228 | + | LRP2                                   | promoter          | N_Shore | chr2:170220772-170221114 |
| cg16691888 | chr2 | 170219230 | + | LRP2                                   | promoter          | N_Shore | chr2:170220772-170221114 |
| cg02714065 | chr2 | 170219405 | + | LRP2                                   | promoter          | N_Shore | chr2:170220772-170221114 |
| cg26173847 | chr7 | 127671017 | + | LRRC4; SND1                            | promoter_and_body | N_Shore | chr7:127671158-127672853 |
| cg19849428 | chr1 | 40314978  | - | LRRC4C                                 | promoter_and_body | OpenSea |                          |
| cg21189727 | chr8 | 67940950  | + | LRRC67                                 | promoter          | Island  | chr8:67940691-67940997   |
| cg10838789 | chr8 | 67940989  | + | LRRC67                                 | promoter          | Island  | chr8:67940691-67940997   |
| cg15674193 | chr2 | 238535910 | + | LRRFIP1                                | promoter          | Island  | chr2:238535561-238536840 |
| cg09615224 | chr3 | 3842202   | - | LRRN1                                  | promoter          | Island  | chr3:3840513-3842772     |
| cg13826564 | chr1 | 65306731  | - | LTBP3                                  | body              | Island  | chr11:65305935-65308502  |
| cg26559315 | chr8 | 143858636 | + | LYNX1                                  | promoter_and_body | Island  | chr8:143858279-143859411 |
| cg11364273 | chr1 | 63768032  | - | MACROD1                                | body              | Island  | chr11:63766058-63768666  |
| cg03103218 | chr1 | 63828672  | - | MACROD1                                | body              | OpenSea |                          |
| cg09908110 | chr1 | 63828713  | - | MACROD1                                | body              | OpenSea |                          |
| cg06834240 | chr1 | 79632625  | - | MAF                                    | body              | Island  | chr16:79632619-79635537  |
| cg17865533 | chr1 | 48087087  | - | MAPK4                                  | promoter          | Island  | chr18:48085838-48087589  |
| cg21327887 | chr1 | 43971928  | + | MAPT;<br>LOC100128977;<br>LOC100130148 | promoter_and_body | Island  | chr17:43971410-43975040  |
| cg10780632 | chr1 | 43973522  | - | MAPT;<br>LOC100128977;<br>LOC100130148 | promoter_and_body | Island  | chr17:43971410-43975040  |
| cg00891649 | chr1 | 43972573  | - | MAPT;<br>LOC100130148;<br>LOC100128977 | promoter_and_body | Island  | chr17:43971410-43975040  |
| cg07420190 | chr1 | 220702225 | - | MARK1                                  | body              | Island  | chr1:220701507-220702348 |
| cg06537894 | chr1 | 12978706  | + | MAST1                                  | body              | Island  | chr19:12978359-12978785  |
| cg05068987 | chr1 | 12978714  | + | MAST1                                  | body              | Island  | chr19:12978359-12978785  |
| cg24689196 | chr5 | 65893165  | - | MAST4; MAST4                           | body              | Island  | chr5:65891877-65893539   |
| cg11256364 | chr7 | 114562847 | + | MDFIC                                  | promoter_and_body | Island  | chr7:114562170-114563193 |
| cg24255728 | chr3 | 150804063 | + | MED12L                                 | promoter          | Island  | chr3:150802996-150805168 |
| cg02761345 | chr5 | 88179386  | + | MEF2C                                  | promoter          | N_Shore | chr5:88179866-88180258   |
| cg25611476 | chr5 | 88179989  | + | MEF2C                                  | promoter          | Island  | chr5:88179866-88180258   |

|            |      |           |   |                    |                   |         |                           |
|------------|------|-----------|---|--------------------|-------------------|---------|---------------------------|
| cg13690989 | chr5 | 88180146  | + | MEF2C              | promoter          | Island  | chr5:88179866-88180258    |
| cg04280969 | chr5 | 126626092 | + | MEGF10             | promoter          | Island  | chr5:126626053-126626901  |
| cg23398076 | chr2 | 66664960  | + | MEIS1              | body              | S_Shelf | chr2:66661118-66661657    |
| cg15978039 | chr2 | 66667065  | + | MEIS1              | body              | OpenSea |                           |
| cg17454831 | chr2 | 66667073  | + | MEIS1              | body              | OpenSea |                           |
| cg00003994 | chr7 | 15725862  | - | MEOX2              | body              | OpenSea |                           |
| cg07499241 | chr2 | 27053934  | + | MIAT               | body              | S_Shore | chr22:27053081-27053629   |
| cg04355791 | chr1 | 43602436  | - | MIR129-2           | promoter          | N_Shore | chr11:43602545-43603215   |
| cg24870774 | chr1 | 61583342  | + | MIR1908; FADS1     | promoter_and_body | Island  | chr11:61582573-61584728   |
| cg10662314 | chr1 | 54384662  | - | MIR196A2           | promoter          | N_Shelf | chr12:54387825-54388732   |
| cg04481923 | chr5 | 135416205 | - | MIR886             | body              | Island  | chr5:135416204-135416475  |
| cg20395153 | chr1 | 280313805 | - | MKX                | body              | Island  | chr10:28030182-28035211   |
| cg25523538 | chr1 | 280319507 | + | MKX                | body              | Island  | chr10:28030182-28035211   |
| cg17222452 | chr3 | 158289160 | - | MLF1               | promoter_and_body | Island  | chr3:158288800-158289271  |
| cg17344755 | chr3 | 154797563 | - | MME                | promoter          | Island  | chr3:154797398-154797988  |
| cg20844545 | chr1 | 132312875 | + | MMP17              | promoter          | Island  | chr12:132312439-132315739 |
| cg11798909 | chr1 | 1567820   | - | MMP23A             | promoter_and_body | Island  | chr1:1564421-1570006      |
| cg00278028 | chr2 | 28196834  | - | MN1                | promoter_and_body | Island  | chr22:28192793-28198592   |
| cg11213308 | chr1 | 30606612  | - | MPPED2             | promoter          | Island  | chr11:30606004-30608128   |
| cg11855526 | chr1 | 30607068  | + | MPPED2             | promoter          | Island  | chr11:30606004-30608128   |
| cg24702253 | chr1 | 3240068   | + | MRGPRG; C11orf36   | promoter_and_body | S_Shore | chr11:3239217-3239988     |
| cg04131969 | chr2 | 33951647  | - | MYADML             | body              | N_Shore | chr2:33952422-33952684    |
| cg22297146 | chr1 | 48470516  | - | MYEF2              | promoter_and_body | Island  | chr15:48470007-48470628   |
| cg14860120 | chr1 | 48470606  | - | MYEF2              | promoter          | Island  | chr15:48470007-48470628   |
| cg06011292 | chr1 | 85340137  | + | MYH10              | promoter_and_body | Island  | chr17:8533004-8534933     |
| cg00268185 | chr3 | 123602768 | + | MYLK               | promoter          | Island  | chr3:123602588-123603540  |
| cg22344611 | chr1 | 17743610  | - | MYOD1              | none              | Island  | chr11:17740789-17743779   |
| cg20686479 | chr1 | 19735701  | - | NAV2; LOC100126784 | body              | S_Shore | chr11:19733936-19735320   |
| cg22681934 | chr1 | 19322563  | - | NCAN               | promoter          | N_Shore | chr19:19322675-19322916   |
| cg08181476 | chr1 | 19322676  | - | NCAN               | promoter          | Island  | chr19:19322675-19322916   |
| cg12915892 | chr2 | 134024093 | - | NCKAP5             | body              | Island  | chr2:134023947-134024467  |
| cg04474007 | chr1 | 52207269  | - | NCRNA00085         | body              | Island  | chr19:52207132-52207731   |
| cg19818998 | chr1 | 52207792  | + | NCRNA00085         | body              | S_Shore | chr19:52206244-52206726   |
| cg02040433 | chr1 | 58497815  | + | NDRG4              | promoter          | Island  | chr16:58497033-58498595   |

|            |       |           |   |         |                   |         |                           |
|------------|-------|-----------|---|---------|-------------------|---------|---------------------------|
| cg00984694 | chr16 | 58498151  | - | NDRG4   | promoter_and_body | Island  | chr16:58497033-58498595   |
| cg06650115 | chr16 | 58498585  | - | NDRG4   | promoter_and_body | Island  | chr16:58497033-58498595   |
| cg02070685 | chr16 | 84002370  | - | NECAB2  | body              | Island  | chr16:84002269-84002860   |
| cg01583969 | chr8  | 24773148  | - | NEFM    | promoter_and_body | S_Shore | chr8:24770908-24772547    |
| cg14689623 | chr11 | 20691161  | + | NELL1   | promoter_and_body | Island  | chr11:20690579-20691845   |
| cg04261192 | chr11 | 20691341  | - | NELL1   | body              | Island  | chr11:20690579-20691845   |
| cg01563031 | chr11 | 20691429  | - | NELL1   | body              | Island  | chr11:20690579-20691845   |
| cg22773093 | chr12 | 45269519  | + | NELL2   | promoter_and_body | N_Shore | chr12:45269830-45270835   |
| cg10164885 | chr12 | 45269587  | + | NELL2   | promoter_and_body | N_Shore | chr12:45269830-45270835   |
| cg22932815 | chr12 | 45269604  | + | NELL2   | promoter_and_body | N_Shore | chr12:45269830-45270835   |
| cg16845486 | chr12 | 45269610  | + | NELL2   | promoter_and_body | N_Shore | chr12:45269830-45270835   |
| cg14904464 | chr12 | 45269790  | - | NELL2   | promoter_and_body | N_Shore | chr12:45269830-45270835   |
| cg20459111 | chr12 | 45270374  | - | NELL2   | promoter_and_body | Island  | chr12:45269830-45270835   |
| cg15745385 | chr6  | 31830364  | + | NEU1    | body              | Island  | chr6:31830299-31830948    |
| cg25387565 | chr6  | 31830527  | + | NEU1    | body              | Island  | chr6:31830299-31830948    |
| cg19036153 | chr6  | 31830561  | + | NEU1    | promoter_and_body | Island  | chr6:31830299-31830948    |
| cg00890041 | chr6  | 31830570  | + | NEU1    | promoter_and_body | Island  | chr6:31830299-31830948    |
| cg02180498 | chr6  | 31830572  | + | NEU1    | promoter_and_body | Island  | chr6:31830299-31830948    |
| cg11401682 | chr6  | 31830616  | + | NEU1    | promoter_and_body | Island  | chr6:31830299-31830948    |
| cg17012202 | chr6  | 31830656  | + | NEU1    | promoter_and_body | Island  | chr6:31830299-31830948    |
| cg14119437 | chr6  | 31830721  | + | NEU1    | promoter          | Island  | chr6:31830299-31830948    |
| cg13510327 | chr6  | 31830729  | + | NEU1    | promoter          | Island  | chr6:31830299-31830948    |
| cg00255142 | chr6  | 31830812  | + | NEU1    | promoter          | Island  | chr6:31830299-31830948    |
| cg27315170 | chr6  | 31830937  | + | NEU1    | promoter          | Island  | chr6:31830299-31830948    |
| cg01431993 | chr2  | 182542864 | - | NEUROD1 | body              | OpenSea |                           |
| cg21139392 | chr17 | 47573016  | - | NGFR    | body              | Island  | chr17:47572345-47575316   |
| cg21309100 | chr17 | 47575150  | - | NGFR    | body              | Island  | chr17:47572345-47575316   |
| cg23483765 | chr5  | 156886996 | - | NIPAL4  | promoter          | Island  | chr5:156886969-156887440  |
| cg01509237 | chr8  | 63160509  | - | NKAIN3  | promoter          | N_Shore | chr8:63160598-63162064    |
| cg06299833 | chr10 | 126136709 | + | NKX1-2  | body              | Island  | chr10:126135809-126138896 |
| cg10155205 | chr10 | 126137517 | + | NKX1-2  | body              | Island  | chr10:126135809-126138896 |
| cg02090569 | chr14 | 36989588  | + | NKX2-1  | promoter          | Island  | chr14:36986362-36990576   |
| cg10999312 | chr14 | 36989936  | - | NKX2-1  | promoter          | Island  | chr14:36986362-36990576   |
| cg08287265 | chr10 | 101292766 | - | NKX2-3  | promoter_and_body | Island  | chr10:101292436-101292851 |

|            |       |           |   |        |                   |         |                           |
|------------|-------|-----------|---|--------|-------------------|---------|---------------------------|
| cg10530851 | chr14 | 37051417  | + | NKX2-8 | body              | Island  | chr14:37049333-37051726   |
| cg18894815 | chr4  | 13546292  | + | NKX3-2 | promoter          | Island  | chr4:13543562-13546494    |
| cg24845848 | chr4  | 85414873  | + | NKX6-1 | body              | Island  | chr4:85413997-85414874    |
| cg09260089 | chr10 | 134599860 | + | NKX6-2 | promoter          | Island  | chr10:134597357-134602649 |
| cg21772509 | chr8  | 41503840  | + | NKX6-3 | none              | N_Shore | chr8:41503916-41504266    |
| cg13238990 | chr3  | 173115252 | + | NLGN1  | promoter          | N_Shore | chr3:173115404-173115775  |
| cg26916166 | chr1  | 183387420 | - | NMNAT2 | promoter_and_body | Island  | chr1:183386000-183387664  |
| cg15577010 | chr2  | 232395273 | + | NMUR1  | promoter          | Island  | chr2:232394763-232395337  |
| cg16877924 | chr2  | 73429354  | + | NOTO   | promoter          | Island  | chr2:73429283-73430647    |
| cg14939652 | chr14 | 33407765  | + | NPAS3  | promoter          | S_Shelf | chr14:33402094-33404079   |
| cg26708548 | chr2  | 232791101 | + | NPPC   | promoter          | Island  | chr2:232789995-232791286  |
| cg14311471 | chr5  | 327111095 | - | NPR3   | promoter          | Island  | chr5:32709910-32714450    |
| cg24164873 | chr5  | 32711151  | - | NPR3   | promoter          | Island  | chr5:32709910-32714450    |
| cg16964348 | chr7  | 24323799  | + | NPY    | promoter          | Island  | chr7:24323558-24325080    |
| cg25884711 | chr7  | 24323840  | + | NPY    | promoter_and_body | Island  | chr7:24323558-24325080    |
| cg04407470 | chr6  | 108489977 | - | NR2E1  | body              | Island  | chr6:108485671-108490539  |
| cg13776285 | chr6  | 108490264 | + | NR2E1  | body              | Island  | chr6:108485671-108490539  |
| cg11504897 | chr6  | 6007412   | - | NRN1   | promoter_and_body | Island  | chr6:6007387-6007797      |
| cg25307691 | chr6  | 6009011   | - | NRN1   | promoter          | Island  | chr6:6008857-6009299      |
| cg05495351 | chr2  | 51259693  | + | NRXN1  | promoter          | OpenSea |                           |
| cg04324727 | chr14 | 79745579  | - | NRXN3  | promoter_and_body | Island  | chr14:79745153-79746059   |
| cg00297966 | chr8  | 126186709 | - | NSMCE2 | body              | OpenSea |                           |
| cg23045719 | chr1  | 40137636  | - | NT5C1A | body              | Island  | chr1:40136988-40138087    |
| cg23415756 | chr1  | 89257527  | - | NTN1   | body              | Island  | chr1:8924167-8926920      |
| cg15128200 | chr1  | 107682674 | - | NTNG1  | promoter_and_body | N_Shore | chr1:107682889-107684463  |
| cg02361557 | chr1  | 107682963 | + | NTNG1  | promoter          | Island  | chr1:107682889-107684463  |
| cg07005523 | chr1  | 107683187 | - | NTNG1  | promoter          | Island  | chr1:107682889-107684463  |
| cg07155336 | chr1  | 107683775 | - | NTNG1  | promoter          | Island  | chr1:107682889-107684463  |
| cg09508770 | chr1  | 107684255 | + | NTNG1  | promoter          | Island  | chr1:107682889-107684463  |
| cg06368118 | chr1  | 107684339 | + | NTNG1  | promoter          | Island  | chr1:107682889-107684463  |
| cg07470367 | chr1  | 107684425 | + | NTNG1  | promoter          | Island  | chr1:107682889-107684463  |
| cg16785690 | chr9  | 135037323 | - | NTNG2  | promoter          | Island  | chr9:135036713-135038933  |
| cg01009697 | chr9  | 87283470  | + | NTRK2  | promoter_and_body | Island  | chr9:87283178-87285704    |
| cg14299675 | chr9  | 91149046  | - | NXNL2  | promoter          | N_Shore | chr9:91149945-91150648    |

|            |       |           |   |                        |                   |         |                           |
|------------|-------|-----------|---|------------------------|-------------------|---------|---------------------------|
| cg15167646 | chr17 | 47653306  | - | NXPH3                  | promoter_and_body | Island  | chr17:47653211-47654369   |
| cg02527669 | chr2  | 220417030 | - | OBSL1                  | body              | Island  | chr2:220416863-220417869  |
| cg11531021 | chr2  | 220417249 | - | OBSL1                  | body              | Island  | chr2:220416863-220417869  |
| cg21323441 | chr15 | 28344349  | + | OCA2                   | promoter          | Island  | chr15:28344188-28344489   |
| cg22635008 | chr10 | 50970249  | - | OGDHL                  | promoter          | Island  | chr10:50969658-50970605   |
| cg09647147 | chr10 | 50970575  | + | OGDHL                  | promoter          | Island  | chr10:50969658-50970605   |
| cg00208967 | chr19 | 10047924  | + | OLFM2                  | promoter          | S_Shore | chr19:10046824-10047067   |
| cg15299832 | chr21 | 34398131  | + | OLIG2                  | promoter          | Island  | chr21:34395128-34400245   |
| cg10835584 | chr18 | 55108852  | + | ONECUT2                | body              | Island  | chr18:55103154-55108853   |
| cg02224864 | chr11 | 132934554 | - | OPCML                  | body              | S_Shore | chr11:132934059-132934291 |
| cg08366446 | chr1  | 29138936  | + | OPRD1                  | body              | Island  | chr1:29138501-29139348    |
| cg02164129 | chr5  | 76926550  | - | OTP                    | body              | Island  | chr5:76925445-76926875    |
| cg13990092 | chr13 | 97646731  | + | OXGR1                  | promoter          | Island  | chr13:97646394-97646737   |
| cg22996489 | chr13 | 97646736  | + | OXGR1                  | promoter          | Island  | chr13:97646394-97646737   |
| cg19619174 | chr3  | 8810139   | + | OXTR                   | promoter          | Island  | chr3:8808961-8811280      |
| cg03987506 | chr3  | 8810549   | + | OXTR                   | promoter          | Island  | chr3:8808961-8811280      |
| cg06903384 | chr3  | 152553711 | + | P2RY1                  | body              | Island  | chr3:152552602-152553712  |
| cg25681618 | chr2  | 71454280  | + | PAIP2B                 | promoter          | Island  | chr2:71453588-71454318    |
| cg04912999 | chr3  | 142682652 | + | PAQR9                  | promoter          | Island  | chr3:142681137-142683268  |
| cg17627617 | chr3  | 142682682 | - | PAQR9                  | promoter          | Island  | chr3:142681137-142683268  |
| cg16616521 | chr11 | 31821388  | + | PAX6                   | body              | Island  | chr11:31820060-31821416   |
| cg21764190 | chr11 | 31835534  | - | PAX6                   | promoter          | Island  | chr11:31831620-31839038   |
| cg23655970 | chr14 | 37126582  | - | PAX9                   | promoter          | N_Shore | chr14:37126786-37128274   |
| cg11591516 | chr10 | 85954316  | + | PCDH21                 | promoter          | Island  | chr10:85954199-85955303   |
| cg16678602 | chr10 | 85954331  | + | PCDH21                 | promoter          | Island  | chr10:85954199-85955303   |
| cg03611007 | chr10 | 85954336  | + | PCDH21                 | promoter          | Island  | chr10:85954199-85955303   |
| cg18117367 | chr5  | 140213783 | - | PCDHA                  | promoter_and_body | N_Shore | chr5:140214068-140214464  |
| cg12629325 | chr5  | 140306458 | - | PCDHAC; PCDHA          | promoter_and_body | Island  | chr5:140305712-140307193  |
| cg06827143 | chr5  | 140430921 | - | PCDHB                  | promoter          | OpenSea |                           |
| cg09178190 | chr5  | 140529580 | - | PCDHB                  | promoter          | N_Shore | chr5:140531157-140532017  |
| cg09066326 | chr5  | 140753415 | + | PCDHGA                 | promoter_and_body | N_Shore | chr5:140753654-140753952  |
| cg02780295 | chr5  | 140855463 | - | PCDHGA; PCDHGB; PCDHGC | promoter_and_body | Island  | chr5:140855386-140856620  |
| cg13993336 | chr5  | 140855482 | - | PCDHGA; PCDHGB; PCDHGC | promoter_and_body | Island  | chr5:140855386-140856620  |
| cg00281842 | chr5  | 140855562 | + | PCDHGA; PCDHGB; PCDHGC | promoter_and_body | Island  | chr5:140855386-140856620  |



|            |      |           |   |                        |                   |         |                           |
|------------|------|-----------|---|------------------------|-------------------|---------|---------------------------|
| cg10858746 | chr5 | 140855582 | - | PCDHGA; PCDHGB; PCDHGC | promoter_and_body | Island  | chr5:140855386-140856620  |
| cg06428620 | chr5 | 140864276 | - | PCDHGA; PCDHGC; PCDHGB | promoter_and_body | N_Shore | chr5:140864527-140864748  |
| cg17137182 | chr7 | 82792284  | + | PCLO                   | promoter          | Island  | chr7:82791674-82792412    |
| cg13909585 | chr7 | 82792379  | + | PCLO                   | promoter          | Island  | chr7:82791674-82792412    |
| cg21878859 | chr5 | 95767724  | + | PCSK1                  | body              | N_Shore | chr5:95768874-95769080    |
| cg18840956 | chr5 | 95769005  | + | PCSK1                  | promoter          | Island  | chr5:95768874-95769080    |
| cg04584301 | chr2 | 17208740  | + | PCSK2                  | body              | Island  | chr20:17208550-17208756   |
| cg00565070 | chr1 | 10530736  | + | PDE4A                  | promoter          | Island  | chr19:10529627-10532004   |
| cg12052265 | chr1 | 104034058 | - | PDGFD                  | body              | N_Shore | chr11:104034536-104035058 |
| cg07748540 | chr1 | 104034619 | - | PDGFD                  | body              | Island  | chr11:104034536-104035058 |
| cg04518342 | chr5 | 131593106 | - | PDLIM4                 | promoter          | Island  | chr5:131593039-131593813  |
| cg11843238 | chr5 | 131593191 | - | PDLIM4                 | promoter          | Island  | chr5:131593039-131593813  |
| cg18301423 | chr5 | 131593218 | - | PDLIM4                 | promoter          | Island  | chr5:131593039-131593813  |
| cg11791751 | chr1 | 13910138  | - | PDPN                   | promoter          | Island  | chr1:13910137-13910868    |
| cg05140069 | chr1 | 13910667  | - | PDPN                   | promoter_and_body | Island  | chr1:13910137-13910868    |
| cg05281894 | chr1 | 13910698  | - | PDPN                   | promoter_and_body | Island  | chr1:13910137-13910868    |
| cg09804380 | chr1 | 13910700  | - | PDPN                   | promoter_and_body | Island  | chr1:13910137-13910868    |
| cg16581884 | chr1 | 100999953 | - | PGR                    | promoter_and_body | Island  | chr11:100999946-101000437 |
| cg00758296 | chr2 | 45402995  | + | PHF21B                 | body              | N_Shore | chr22:45403036-45406372   |
| cg09021039 | chr2 | 45403893  | - | PHF21B                 | body              | Island  | chr22:45403036-45406372   |
| cg13103303 | chr1 | 71955113  | - | PHOX2A                 | promoter_and_body | Island  | chr11:71954816-71955659   |
| cg07754999 | chr1 | 103991057 | - | PITX3                  | body              | Island  | chr10:103990213-103991829 |
| cg27649073 | chr1 | 104001259 | + | PITX3                  | promoter          | Island  | chr10:104000254-104001741 |
| cg26354017 | chr1 | 205819088 | + | PM20D1                 | body              | Island  | chr1:205818898-205819191  |
| cg14159672 | chr1 | 205819179 | + | PM20D1                 | body              | Island  | chr1:205818898-205819191  |
| cg11965913 | chr1 | 205819406 | - | PM20D1                 | promoter          | S_Shore | chr1:205818898-205819191  |
| cg01394819 | chr1 | 53527665  | - | PODN                   | promoter          | Island  | chr1:53527572-53528974    |
| cg13764106 | chr1 | 53527693  | - | PODN                   | promoter          | Island  | chr1:53527572-53528974    |
| cg13357482 | chr6 | 105628017 | + | POPDC3                 | promoter          | S_Shore | chr6:105627406-105627830  |
| cg06577045 | chr6 | 105628022 | + | POPDC3                 | promoter          | S_Shore | chr6:105627406-105627830  |
| cg24989739 | chr6 | 105628027 | + | POPDC3                 | promoter          | S_Shore | chr6:105627406-105627830  |
| cg14422660 | chr6 | 105628044 | + | POPDC3                 | promoter          | S_Shore | chr6:105627406-105627830  |
| cg02407659 | chr6 | 105628063 | + | POPDC3                 | promoter          | S_Shore | chr6:105627406-105627830  |
| cg05628417 | chr6 | 105628165 | + | POPDC3                 | promoter          | S_Shore | chr6:105627406-105627830  |

|            |       |           |   |          |                   |         |                           |
|------------|-------|-----------|---|----------|-------------------|---------|---------------------------|
| cg25488697 | chr1  | 38510383  | - | POU3F1   | body              | Island  | chr1:38510102-38513642    |
| cg03636215 | chr1  | 38512601  | + | POU3F1   | promoter          | Island  | chr1:38510102-38513642    |
| cg24474130 | chr6  | 99282348  | - | POU3F2   | promoter          | Island  | chr6:99279317-99283842    |
| cg02176407 | chr6  | 99282754  | + | POU3F2   | body              | Island  | chr6:99279317-99283842    |
| cg16202970 | chr6  | 99283201  | + | POU3F2   | body              | Island  | chr6:99279317-99283842    |
| cg22085539 | chr6  | 99284027  | - | POU3F2   | body              | S_Shore | chr6:99279317-99283842    |
| cg21200539 | chr4  | 147562073 | - | POU4F2   | none              | S_Shore | chr4:147559205-147561901  |
| cg08884571 | chr19 | 45901453  | + | PPP1R13L | body              | Island  | chr19:45901452-45901688   |
| cg13645732 | chr19 | 45901649  | + | PPP1R13L | promoter          | Island  | chr19:45901452-45901688   |
| cg08196968 | chr19 | 38746749  | + | PPP1R14A | body              | Island  | chr19:38746638-38747379   |
| cg13564825 | chr19 | 38747201  | - | PPP1R14A | promoter          | Island  | chr19:38746638-38747379   |
| cg22557662 | chr19 | 38747374  | - | PPP1R14A | promoter          | Island  | chr19:38746638-38747379   |
| cg04916107 | chr7  | 94537805  | - | PPP1R9A  | promoter          | S_Shore | chr7:94536849-94537477    |
| cg08073166 | chr7  | 94538182  | - | PPP1R9A  | promoter          | S_Shore | chr7:94536849-94537477    |
| cg17034088 | chr7  | 94538194  | - | PPP1R9A  | promoter          | S_Shore | chr7:94536849-94537477    |
| cg25021259 | chr5  | 146258546 | + | PPP2R2B  | promoter_and_body | Island  | chr5:146257346-146258575  |
| cg05920961 | chr14 | 102248253 | + | PPP2R5C  | body              | Island  | chr14:102247660-102248279 |
| cg19391276 | chr6  | 100055785 | + | PRDM13   | body              | Island  | chr6:100055641-100055866  |
| cg26762347 | chr1  | 2990031   | - | PRDM16   | body              | Island  | chr1:2990030-2990718      |
| cg01961086 | chr1  | 3086487   | - | PRDM16   | body              | OpenSea |                           |
| cg10416963 | chr4  | 121844401 | - | PRDM5    | promoter          | S_Shore | chr4:121843148-121844193  |
| cg19157243 | chr5  | 122424706 | - | PRDM6    | promoter          | N_Shore | chr5:122424905-122425958  |
| cg20142271 | chr4  | 81106287  | + | PRDM8    | promoter          | S_Shore | chr4:81104761-81105527    |
| cg26162932 | chr4  | 81106342  | + | PRDM8    | promoter          | S_Shore | chr4:81104761-81105527    |
| cg25591794 | chr13 | 28554842  | - | PRHOXNB  | body              | Island  | chr13:28554427-28555065   |
| cg09763175 | chr1  | 57110722  | + | PRKAA2   | promoter          | Island  | chr1:57110663-57111337    |
| cg04876835 | chr1  | 57111099  | - | PRKAA2   | body              | Island  | chr1:57110663-57111337    |
| cg18601167 | chr7  | 752286    | + | PRKAR1B  | promoter          | S_Shore | chr7:750788-751237        |
| cg13895235 | chr7  | 752292    | + | PRKAR1B  | promoter          | S_Shore | chr7:750788-751237        |
| cg04884011 | chr10 | 52833909  | + | PRKG1    | promoter_and_body | Island  | chr10:52833539-52834752   |
| cg27380599 | chr10 | 52834067  | + | PRKG1    | promoter_and_body | Island  | chr10:52833539-52834752   |
| cg02731293 | chr10 | 52834076  | + | PRKG1    | promoter_and_body | Island  | chr10:52833539-52834752   |
| cg04327529 | chr10 | 52834121  | + | PRKG1    | promoter_and_body | Island  | chr10:52833539-52834752   |
| cg12022294 | chr10 | 52834676  | - | PRKG1    | body              | Island  | chr10:52833539-52834752   |

|            |           |               |   |          |                   |         |                               |
|------------|-----------|---------------|---|----------|-------------------|---------|-------------------------------|
| cg24453580 | chr1<br>2 | 4969106<br>4  | - | PRPH     | body              | Island  | chr12:4968887<br>3-49691360   |
| cg16621691 | chr5      | 1198006<br>87 | - | PRR16    | promoter          | N_Shore | chr5:11980097<br>1-119801194  |
| cg04480903 | chr2<br>2 | 4506447<br>1  | + | PRR5     | promoter          | Island  | chr22:4506415<br>9-45065092   |
| cg13713739 | chr9      | 1324833<br>77 | - | PRRX2    | body              | S_Shore | chr9:13248147<br>2-132481745  |
| cg12092561 | chr1      | 1153884<br>0  | - | PTCHD2   | promoter          | Island  | chr1:11538669-<br>11540342    |
| cg24126187 | chr3      | 4692354<br>6  | + | PTH1R    | promoter          | Island  | chr3:46923265-<br>46925182    |
| cg13607709 | chr3      | 4694015<br>3  | + | PTH1R    | body              | Island  | chr3:46940054-<br>46940394    |
| cg11334818 | chr1<br>1 | 1881319<br>1  | - | PTPN5    | promoter_and_body | Island  | chr11:1881257<br>2-18814079   |
| cg24485954 | chr1<br>9 | 5293011       | - | PTPRS    | promoter          | Island  | chr19:5293010-<br>5294211     |
| cg16733654 | chr1<br>9 | 5293083       | - | PTPRS    | promoter          | Island  | chr19:5293010-<br>5294211     |
| cg05381423 | chr1<br>9 | 5340713       | - | PTPRS    | promoter_and_body | Island  | chr19:5339640-<br>5341061     |
| cg25902187 | chr1<br>5 | 5588104<br>4  | - | PYGO1    | body              | Island  | chr15:5587979<br>2-55881228   |
| cg06157277 | chr1<br>2 | 2159048<br>0  | - | PYROXD1  | promoter          | Island  | chr12:2159046<br>9-21590785   |
| cg25830696 | chr1<br>7 | 4203047<br>9  | - | PYY      | body              | Island  | chr17:4203017<br>3-42030941   |
| cg21816330 | chr1<br>7 | 2704462<br>9  | + | RAB34    | promoter_and_body | Island  | chr17:2704416<br>8-27045049   |
| cg04842146 | chr8      | 8509705<br>6  | - | RALYL    | promoter          | Island  | chr8:85096759-<br>85097247    |
| cg20668644 | chr1<br>7 | 3834760<br>3  | - | RAPGEFL1 | body              | Island  | chr17:3834753<br>3-38347765   |
| cg02636041 | chr1<br>0 | 4369800<br>8  | + | RASGEF1A | body              | Island  | chr10:4369777<br>7-43698177   |
| cg12451631 | chr1<br>0 | 4369814<br>1  | + | RASGEF1A | body              | Island  | chr10:4369777<br>7-43698177   |
| cg00888521 | chr5      | 8025697<br>1  | + | RASGRF2  | body              | Island  | chr5:80255904-<br>80257006    |
| cg07994622 | chr2<br>0 | 4804052       | - | RASSF2   | promoter          | Island  | chr20:4803013-<br>4804146     |
| cg06328855 | chr1<br>0 | 1124043<br>46 | + | RBM20    | body              | S_Shore | chr10:1124029<br>53-112404328 |
| cg02685016 | chr6      | 1728233<br>3  | - | RBM24    | promoter_and_body | Island  | chr6:17280739-<br>17282334    |
| cg07346310 | chr6      | 1728235<br>4  | - | RBM24    | promoter_and_body | S_Shore | chr6:17280739-<br>17282334    |
| cg20532370 | chr3      | 1392587<br>30 | + | RBP1     | promoter          | Island  | chr3:13925815<br>2-139258731  |
| cg15229124 | chr3      | 1392589<br>12 | + | RBP1     | promoter          | S_Shore | chr3:13925771<br>2-139257949  |
| cg23363832 | chr3      | 1392589<br>39 | + | RBP1     | promoter          | S_Shore | chr3:13925771<br>2-139257949  |
| cg21941030 | chr1<br>9 | 5003101<br>7  | - | RCN3     | promoter_and_body | Island  | chr19:5003098<br>1-50031300   |
| cg19403104 | chr1<br>9 | 5003124<br>6  | - | RCN3     | promoter_and_body | Island  | chr19:5003098<br>1-50031300   |
| cg15963326 | chr1<br>9 | 5003708<br>5  | - | RCN3     | body              | Island  | chr19:5003707<br>8-50037670   |
| cg13412498 | chr9      | 3603734<br>0  | - | RECK     | body              | Island  | chr9:36036798-<br>36037564    |
| cg10599900 | chr2<br>0 | 3006303<br>6  | - | REM1     | promoter          | Island  | chr20:3006296<br>9-30063281   |
| cg12912737 | chr2<br>0 | 3006303<br>8  | - | REM1     | promoter          | Island  | chr20:3006296<br>9-30063281   |
| cg05621401 | chr1<br>0 | 4357206<br>5  | + | RET      | promoter          | Island  | chr10:4357193<br>9-43573434   |

|            |       |           |   |                |                   |         |                           |
|------------|-------|-----------|---|----------------|-------------------|---------|---------------------------|
| cg00540891 | chr10 | 43572244  | + | RET            | promoter          | Island  | chr10:43571939-43573434   |
| cg25566352 | chr12 | 106977562 | - | RFX4           | body              | Island  | chr12:106977388-106977713 |
| cg00450784 | chr12 | 106979062 | - | RFX4           | body              | N_Shore | chr12:106979429-106981086 |
| cg02816003 | chr6  | 117198183 | - | RFX6           | promoter          | Island  | chr6:117198089-117198705  |
| cg09930033 | chr6  | 117198704 | + | RFX6           | body              | Island  | chr6:117198089-117198705  |
| cg09263118 | chr19 | 11531294  | - | RGL3; CCDC151  | promoter          | Island  | chr19:11531278-11531590   |
| cg04761198 | chr8  | 54793733  | - | RGS20          | body              | Island  | chr8:54791845-54795141    |
| cg02779564 | chr8  | 54794348  | + | RGS20          | body              | Island  | chr8:54791845-54795141    |
| cg11679177 | chr1  | 241519652 | + | RGS7           | promoter          | N_Shore | chr1:241520103-241520790  |
| cg04794832 | chr17 | 30593000  | - | RHBDL3         | promoter          | N_Shore | chr17:30593198-30594033   |
| cg16342059 | chr12 | 8849781   | + | RIMKLB         | promoter          | N_Shore | chr12:8849963-8851403     |
| cg22038579 | chr12 | 8849964   | - | RIMKLB         | promoter          | Island  | chr12:8849963-8851403     |
| cg08962682 | chr12 | 8850939   | - | RIMKLB         | promoter          | Island  | chr12:8849963-8851403     |
| cg03231163 | chr19 | 39360465  | + | RINL           | body              | Island  | chr19:39359916-39361160   |
| cg02486253 | chr17 | 55122828  | - | RNF126P1       | promoter          | Island  | chr17:55122795-55124018   |
| cg15576900 | chr1  | 44883697  | + | RNF220         | body              | Island  | chr1:44883136-44884272    |
| cg13880950 | chr1  | 44884096  | - | RNF220         | body              | Island  | chr1:44883136-44884272    |
| cg12548634 | chr1  | 44884109  | - | RNF220         | body              | Island  | chr1:44883136-44884272    |
| cg08574592 | chr15 | 61520873  | - | RORA           | body              | Island  | chr15:61520423-61521716   |
| cg18136062 | chr15 | 61520931  | + | RORA           | body              | Island  | chr15:61520423-61521716   |
| cg07441272 | chr3  | 186857475 | + | RPL39L         | promoter          | Island  | chr3:186856927-186857659  |
| cg23358625 | chr19 | 23945641  | - | RPSAP58        | promoter          | N_Shore | chr19:23945713-23946128   |
| cg05605052 | chr19 | 23945659  | - | RPSAP58        | promoter          | N_Shore | chr19:23945713-23946128   |
| cg06427838 | chr19 | 23945722  | - | RPSAP58        | promoter          | Island  | chr19:23945713-23946128   |
| cg20342628 | chr6  | 90122369  | + | RRAGD          | promoter          | Island  | chr6:90120874-90122370    |
| cg01141940 | chr14 | 60097247  | - | RTN1           | promoter_and_body | Island  | chr14:60097208-60097553   |
| cg19556814 | chr14 | 60337477  | + | RTN1           | promoter_and_body | S_Shore | chr14:60336951-60337461   |
| cg14769786 | chr17 | 1881333   | + | RTN4RL1        | body              | S_Shore | chr17:1880789-1881116     |
| cg26772766 | chr17 | 1928182   | + | RTN4RL1        | promoter          | Island  | chr17:1927051-1929408     |
| cg15414833 | chr7  | 87257767  | - | RUNDC3B; ABCB1 | promoter_and_body | Island  | chr7:87256958-87258444    |
| cg08477332 | chr1  | 153590243 | - | S100A14        | promoter          | OpenSea |                           |
| cg18323466 | chr1  | 101702602 | - | S1PR1          | promoter_and_body | Island  | chr1:101702445-101702745  |
| cg00898147 | chr1  | 21994785  | - | SALL2          | body              | OpenSea |                           |
| cg06685464 | chr22 | 20790837  | + | SCARF2         | body              | Island  | chr22:20790638-20792665   |

|            |                 |                    |   |             |                   |         |                               |
|------------|-----------------|--------------------|---|-------------|-------------------|---------|-------------------------------|
| cg20401551 | chr2<br>2       | 2079098<br>5       | + | SCARF2      | body              | Island  | chr22:2079063<br>8-20792665   |
| cg15243570 | chr2<br>2       | 2079221<br>7       | + | SCARF2      | promoter          | Island  | chr22:2079063<br>8-20792665   |
| cg03952331 | chr2<br>2       | 2079222<br>2       | + | SCARF2      | promoter          | Island  | chr22:2079063<br>8-20792665   |
| cg09290614 | chr3<br>1       | 3869137<br>1       | + | SCN5A       | promoter          | Island  | chr3:38690409-<br>38691513    |
| cg25116191 | chr3<br>6       | 3869150<br>6       | + | SCN5A       | promoter          | Island  | chr3:38690409-<br>38691513    |
| cg16549389 | chr1<br>6       | 2331348<br>0       | - | SCNN1B      | promoter          | Island  | chr16:2331323<br>9-23313946   |
| cg26424556 | chr1<br>6       | 2331350<br>8       | - | SCNN1B      | promoter          | Island  | chr16:2331323<br>9-23313946   |
| cg20366601 | chr4<br>81      | 1412946<br>81      | - | SCOC        | promoter_and_body | Island  | chr4:14129466<br>6-141295274  |
| cg18592561 | chr2<br>0       | 644081<br>0        | - | SCRT2       | none              | Island  | chr20:643975-<br>645233       |
| cg25664438 | chr8<br>3       | 9750559<br>3       | - | SDC2        | promoter          | N_Shore | chr8:97505747-<br>97507607    |
| cg23858558 | chr8<br>0       | 9750560<br>0       | - | SDC2        | promoter          | N_Shore | chr8:97505747-<br>97507607    |
| cg04261408 | chr8<br>5       | 9750667<br>5       | - | SDC2        | body              | Island  | chr8:97505747-<br>97507607    |
| cg10292139 | chr8<br>1       | 9750756<br>1       | - | SDC2        | body              | Island  | chr8:97505747-<br>97507607    |
| cg26472636 | chr5<br>1594282 | 1594282<br>1594282 | + | SDHAP3      | body              | Island  | chr5:1594238-<br>1595027      |
| cg26758486 | chr1<br>7       | 7153328<br>6       | - | SDK2        | body              | OpenSea |                               |
| cg26307359 | chr1<br>7       | 2733264<br>6       | - | SEZ6        | body              | Island  | chr17:2733226<br>8-27333188   |
| cg22831607 | chr1<br>0       | 9953179<br>7       | + | SFRP5       | promoter          | Island  | chr10:9953102<br>5-99531968   |
| cg00673557 | chr6<br>5       | 8982791<br>5       | - | SFRS13B     | promoter          | Island  | chr6:89827134-<br>89828122    |
| cg03209103 | chr7<br>6       | 9428439<br>6       | - | SGCE; PEG10 | promoter_and_body | N_Shore | chr7:94284858-<br>94286527    |
| cg26464535 | chr7<br>3       | 9428440<br>3       | - | SGCE; PEG10 | promoter_and_body | N_Shore | chr7:94284858-<br>94286527    |
| cg04010684 | chr7<br>1       | 9428441<br>1       | - | SGCE; PEG10 | promoter_and_body | N_Shore | chr7:94284858-<br>94286527    |
| cg08607907 | chr7<br>8       | 9428442<br>8       | - | SGCE; PEG10 | promoter_and_body | N_Shore | chr7:94284858-<br>94286527    |
| cg19734015 | chr7<br>2       | 9428443<br>2       | - | SGCE; PEG10 | promoter_and_body | N_Shore | chr7:94284858-<br>94286527    |
| cg25485192 | chr7<br>9       | 9428443<br>9       | - | SGCE; PEG10 | promoter_and_body | N_Shore | chr7:94284858-<br>94286527    |
| cg23498273 | chr7<br>6       | 9428452<br>6       | + | SGCE; PEG10 | promoter_and_body | N_Shore | chr7:94284858-<br>94286527    |
| cg22090863 | chr7<br>3       | 9428462<br>3       | + | SGCE; PEG10 | promoter_and_body | N_Shore | chr7:94284858-<br>94286527    |
| cg21027820 | chr7<br>9       | 9428462<br>9       | + | SGCE; PEG10 | promoter_and_body | N_Shore | chr7:94284858-<br>94286527    |
| cg26912242 | chr7<br>2       | 9428535<br>2       | + | SGCE; PEG10 | promoter_and_body | Island  | chr7:94284858-<br>94286527    |
| cg04366249 | chr7<br>1       | 9428550<br>1       | + | SGCE; PEG10 | promoter_and_body | Island  | chr7:94284858-<br>94286527    |
| cg14388858 | chr7<br>0       | 9428552<br>0       | + | SGCE; PEG10 | promoter_and_body | Island  | chr7:94284858-<br>94286527    |
| cg17338501 | chr3<br>54      | 1538399<br>54      | + | SGEF        | body              | Island  | chr3:15383878<br>7-153840380  |
| cg05476568 | chr3<br>09      | 1538401<br>09      | + | SGEF        | body              | Island  | chr3:15383878<br>7-153840380  |
| cg18290075 | chr3<br>77      | 1538404<br>77      | + | SGEF        | body              | S_Shore | chr3:15383878<br>7-153840380  |
| cg09210519 | chr1<br>0       | 1054523<br>52      | + | SH3PXD2A    | body              | Island  | chr10:1054523<br>38-105453230 |

|            |           |               |   |                    |                   |         |                               |
|------------|-----------|---------------|---|--------------------|-------------------|---------|-------------------------------|
| cg08447324 | chr1<br>9 | 5117081<br>6  | - | SHANK1             | body              | Island  | chr19:5116965<br>9-51172023   |
| cg24033558 | chr1<br>5 | 4547975<br>5  | - | SHF                | body              | Island  | chr15:4547950<br>9-45480498   |
| cg14866200 | chr4      | 4239984<br>3  | + | SHISA3             | promoter          | Island  | chr4:42399152-<br>42400802    |
| cg01565320 | chr4      | 4239985<br>1  | + | SHISA3             | promoter          | Island  | chr4:42399152-<br>42400802    |
| cg02997982 | chr1<br>9 | 4108229<br>1  | - | SHKBP1; SPTBN4     | promoter          | N_Shore | chr19:4108261<br>5-41083355   |
| cg16851417 | chr2<br>1 | 3807704<br>2  | - | SIM2               | body              | Island  | chr21:3807676<br>2-38077685   |
| cg07615087 | chr2<br>1 | 3807734<br>7  | - | SIM2               | body              | Island  | chr21:3807676<br>2-38077685   |
| cg10456990 | chr2<br>1 | 3807759<br>7  | + | SIM2               | body              | Island  | chr21:3807676<br>2-38077685   |
| cg26720125 | chr2<br>1 | 3807767<br>3  | - | SIM2               | body              | Island  | chr21:3807676<br>2-38077685   |
| cg14626259 | chr2<br>1 | 3807901<br>9  | - | SIM2               | body              | N_Shore | chr21:3807994<br>1-38081833   |
| cg00937982 | chr2<br>1 | 3808027<br>4  | - | SIM2               | body              | Island  | chr21:3807994<br>1-38081833   |
| cg00698204 | chr2<br>1 | 3808069<br>4  | - | SIM2               | body              | Island  | chr21:3807994<br>1-38081833   |
| cg01090834 | chr2<br>1 | 3808119<br>3  | - | SIM2               | body              | Island  | chr21:3807994<br>1-38081833   |
| cg19193931 | chr2<br>1 | 3808197<br>6  | - | SIM2               | body              | S_Shore | chr21:3807994<br>1-38081833   |
| cg24080247 | chr2<br>1 | 3808261<br>3  | + | SIM2               | body              | S_Shore | chr21:3807994<br>1-38081833   |
| cg04648480 | chr2<br>1 | 3808309<br>9  | - | SIM2               | body              | S_Shore | chr21:3807994<br>1-38081833   |
| cg25446076 | chr2<br>1 | 3808314<br>9  | - | SIM2               | body              | S_Shore | chr21:3807994<br>1-38081833   |
| cg02711647 | chr2      | 4523768<br>9  | - | SIX2               | promoter          | Island  | chr2:45235511-<br>45237792    |
| cg04954559 | chr1<br>1 | 2236542<br>8  | - | SLC17A6            | body              | S_Shelf | chr11:2236286<br>2-22363377   |
| cg26985666 | chr1<br>1 | 3544108<br>8  | + | SLC1A2             | promoter_and_body | Island  | chr11:3544037<br>5-35441882   |
| cg07724977 | chr1<br>1 | 3544119<br>8  | + | SLC1A2             | promoter          | Island  | chr11:3544037<br>5-35441882   |
| cg11755796 | chr2<br>0 | 1919261<br>6  | + | SLC24A3            | promoter          | Island  | chr20:1919245<br>9-19193902   |
| cg24766334 | chr1<br>4 | 9279007<br>2  | + | SLC24A4            | promoter          | Island  | chr14:9278949<br>4-92790712   |
| cg08718398 | chr7      | 1073022<br>55 | - | SLC26A4; LOC286002 | promoter_and_body | Island  | chr7:10730120<br>5-107302416  |
| cg20103758 | chr5      | 1283006<br>96 | - | SLC27A6            | promoter          | N_Shore | chr5:12830080<br>0-128301329  |
| cg15490840 | chr2<br>0 | 3735208<br>5  | + | SLC32A1            | promoter          | N_Shore | chr20:3735213<br>0-37357372   |
| cg16782807 | chr2<br>0 | 3735425<br>4  | + | SLC32A1            | body              | Island  | chr20:3735213<br>0-37357372   |
| cg13915754 | chr2<br>0 | 3735596<br>5  | + | SLC32A1            | body              | Island  | chr20:3735213<br>0-37357372   |
| cg09699039 | chr6      | 1182415<br>68 | + | SLC35F1            | body              | Island  | chr6:11824134<br>7-118241569  |
| cg00662647 | chr1      | 2343500<br>51 | - | SLC35F3            | body              | Island  | chr1:23434988<br>4-234350471  |
| cg26490054 | chr1<br>2 | 1016040<br>56 | - | SLC5A8             | promoter          | S_Shore | chr12:1016033<br>87-101603933 |
| cg16164276 | chr3      | 1103434<br>5  | - | SLC6A1             | promoter          | N_Shore | chr3:11034446-<br>11035384    |
| cg04210284 | chr5      | 1445561       | + | SLC6A3             | promoter          | Island  | chr5:1444678-<br>1446648      |
| cg27037018 | chr5      | 1445567       | + | SLC6A3             | promoter          | Island  | chr5:1444678-<br>1446648      |

|            |       |           |   |              |                   |         |                           |
|------------|-------|-----------|---|--------------|-------------------|---------|---------------------------|
| cg04140862 | chr14 | 70654639  | + | SLC8A3       | promoter          | N_Shore | chr14:70655095-70656077   |
| cg20267521 | chr14 | 70655056  | + | SLC8A3       | promoter          | N_Shore | chr14:70655095-70656077   |
| cg20409590 | chr14 | 70655382  | - | SLC8A3       | promoter_and_body | Island  | chr14:70655095-70656077   |
| cg05203877 | chr14 | 70655686  | + | SLC8A3       | promoter_and_body | Island  | chr14:70655095-70656077   |
| cg08265644 | chr14 | 70655871  | + | SLC8A3       | promoter          | Island  | chr14:70655095-70656077   |
| cg07136998 | chr5  | 168728081 | - | SLIT3        | promoter_and_body | Island  | chr5:168727429-168728275  |
| cg06143522 | chr13 | 88330200  | + | SLITRK5      | body              | S_Shore | chr13:88329394-88329885   |
| cg00109076 | chr13 | 88330463  | + | SLITRK5      | body              | S_Shore | chr13:88329394-88329885   |
| cg15447479 | chr7  | 128828765 | - | SMO          | promoter_and_body | Island  | chr7:128828333-128829366  |
| cg18420512 | chr7  | 128828982 | - | SMO          | promoter_and_body | Island  | chr7:128828333-128829366  |
| cg02540477 | chr6  | 168842035 | + | SMOC2        | promoter_and_body | Island  | chr6:168841818-168843100  |
| cg04798314 | chr1  | 246668601 | + | SMYD3        | body              | N_Shore | chr1:246670148-246670768  |
| cg25307902 | chr20 | 101992100 | + | SNAP25       | promoter          | N_Shore | chr20:10200088-10200384   |
| cg20003494 | chr4  | 90757398  | + | SNCA         | promoter          | N_Shore | chr4:90758008-90758870    |
| cg05241924 | chr4  | 90759115  | + | SNCA         | promoter          | S_Shore | chr4:90758008-90758870    |
| cg04062510 | chr5  | 121648346 | - | SNCAIP       | promoter          | Island  | chr5:121648312-121648549  |
| cg12544974 | chr5  | 121648479 | + | SNCAIP       | promoter          | Island  | chr5:121648312-121648549  |
| cg08253651 | chr12 | 96252105  | - | SNRPF        | promoter          | Island  | chr12:96252020-96252246   |
| cg09551147 | chr10 | 106399957 | - | SORCS3       | promoter          | Island  | chr10:106399567-106402812 |
| cg06613095 | chr3  | 137483617 | + | SOX14        | promoter_and_body | Island  | chr3:137482964-137484454  |
| cg18184251 | chr3  | 181420086 | + | SOX2OT       | body              | OpenSea |                           |
| cg05513806 | chr3  | 181438216 | - | SOX2OT       | body              | S_Shore | chr3:181437184-181437478  |
| cg13294849 | chr3  | 181441571 | + | SOX2OT       | body              | N_Shelf | chr3:181444409-181445000  |
| cg03783410 | chr3  | 181443800 | - | SOX2OT       | body              | N_Shore | chr3:181444409-181445000  |
| cg22256631 | chr3  | 181443971 | - | SOX2OT       | body              | N_Shore | chr3:181444409-181445000  |
| cg07747133 | chr3  | 181428307 | + | SOX2OT; SOX2 | promoter_and_body | N_Shore | chr3:181430141-181431076  |
| cg04948892 | chr3  | 181428462 | + | SOX2OT; SOX2 | promoter_and_body | N_Shore | chr3:181430141-181431076  |
| cg17023776 | chr12 | 24714652  | - | SOX5         | promoter          | N_Shore | chr12:24714956-24716243   |
| cg08972130 | chr12 | 24715478  | + | SOX5         | promoter          | Island  | chr12:24714956-24716243   |
| cg03625010 | chr12 | 24715484  | + | SOX5         | promoter          | Island  | chr12:24714956-24716243   |
| cg17853504 | chr12 | 24715538  | + | SOX5         | promoter          | Island  | chr12:24714956-24716243   |
| cg10158080 | chr12 | 24715864  | - | SOX5         | promoter          | Island  | chr12:24714956-24716243   |
| cg07813142 | chr2  | 171573223 | + | SP5          | body              | Island  | chr2:171569877-171573904  |
| cg27515369 | chr3  | 140770599 | + | SPSB4        | promoter          | Island  | chr3:140769886-140771080  |

|            |       |           |   |             |                   |         |                           |
|------------|-------|-----------|---|-------------|-------------------|---------|---------------------------|
| cg02884884 | chr7  | 75831418  | - | SRRM3       | promoter          | Island  | chr7:75831068-75831542    |
| cg04573550 | chr14 | 38680313  | + | SSTR1       | none              | Island  | chr14:38678245-38680937   |
| cg27066284 | chr17 | 71161258  | - | SSTR2       | promoter_and_body | Island  | chr17:71160922-71162350   |
| cg01234063 | chr11 | 12622607  | - | ST3GAL4     | promoter          | Island  | chr11:12622535-126226073  |
| cg12726960 | chr3  | 36421703  | - | STAC        | promoter          | Island  | chr3:36421702-36422210    |
| cg19055231 | chr3  | 36422397  | - | STAC        | body              | S_Shore | chr3:36421702-36422210    |
| cg07280482 | chr17 | 37382173  | + | STAC2       | promoter          | Island  | chr17:37380953-37382363   |
| cg06609197 | chr8  | 80524611  | + | STMN2       | body              | Island  | chr8:80523975-80525765    |
| cg03524572 | chr20 | 62284488  | + | STMN3       | body              | Island  | chr20:62283516-62284835   |
| cg10957242 | chr4  | 184826299 | - | STOX2       | promoter          | Island  | chr4:184826253-184828177  |
| cg11354594 | chr4  | 184826704 | - | STOX2       | promoter_and_body | Island  | chr4:184826253-184828177  |
| cg02500300 | chr4  | 184827754 | - | STOX2       | promoter_and_body | Island  | chr4:184826253-184828177  |
| cg02043600 | chr16 | 31021933  | - | STX1B       | promoter          | OpenSea |                           |
| cg05293820 | chr3  | 120627406 | - | STXBP5L     | promoter          | Island  | chr3:120626880-120627579  |
| cg25742540 | chr15 | 91643000  | - | SV2B        | promoter          | Island  | chr15:91642908-91643702   |
| cg08326075 | chr15 | 91643003  | - | SV2B        | promoter          | Island  | chr15:91642908-91643702   |
| cg18144285 | chr15 | 91643026  | - | SV2B        | promoter          | Island  | chr15:91642908-91643702   |
| cg18750433 | chr15 | 91643036  | - | SV2B        | promoter          | Island  | chr15:91642908-91643702   |
| cg06705526 | chr5  | 75379336  | - | SV2C; SV2C  | promoter_and_body | Island  | chr5:75378974-75380796    |
| cg09546168 | chr16 | 77246495  | - | SYCE1L      | body              | Island  | chr16:77245944-77247013   |
| cg01504555 | chr16 | 77246968  | - | SYCE1L      | none              | Island  | chr16:77245944-77247013   |
| cg05470389 | chr22 | 33197618  | - | SYN3; TIMP3 | promoter_and_body | Island  | chr22:33197380-33198267   |
| cg26620959 | chr6  | 152958489 | + | SYNE1       | promoter_and_body | S_Shore | chr6:152957810-152958472  |
| cg09948076 | chr15 | 99645088  | + | SYNM        | promoter          | Island  | chr15:99645030-99646444   |
| cg10637512 | chr15 | 99645096  | + | SYNM        | promoter          | Island  | chr15:99645030-99646444   |
| cg03863616 | chr1  | 79257853  | + | SYT1        | promoter_and_body | OpenSea |                           |
| cg10377414 | chr17 | 80832836  | - | TBCD        | body              | S_Shelf | chr17:80829533-80829871   |
| cg06747745 | chr11 | 120894801 | - | TBCEL       | promoter          | Island  | chr11:120894689-120895082 |
| cg22794704 | chr2  | 162273437 | + | TBR1        | body              | Island  | chr2:162273294-162273725  |
| cg01697719 | chr22 | 19754125  | + | TBX1        | body              | Island  | chr22:19753312-19755013   |
| cg01765249 | chr17 | 59476334  | - | TBX2        | promoter          | Island  | chr17:59473060-59483266   |
| cg11031701 | chr17 | 59478068  | + | TBX2        | body              | Island  | chr17:59473060-59483266   |
| cg26281453 | chr17 | 45810610  | - | TBX21       | promoter_and_body | Island  | chr17:45810589-45811388   |
| cg19597776 | chr18 | 53254863  | + | TCF4        | promoter          | N_Shelf | chr18:53257018-53257309   |



|            |       |           |   |              |                   |         |                           |
|------------|-------|-----------|---|--------------|-------------------|---------|---------------------------|
| cg23482397 | chr18 | 53257226  | - | TCF4         | promoter          | Island  | chr18:53257018-53257309   |
| cg21624739 | chr2  | 85359957  | - | TCF7L1       | promoter          | Island  | chr2:85359956-85362593    |
| cg20663042 | chr1  | 67349407  | + | TEKT1        | promoter          | OpenSea |                           |
| cg04462627 | chr1  | 58019123  | - | TEPP         | body              | Island  | chr16:58018400-58019471   |
| cg13848707 | chr1  | 70321243  | - | TET1         | promoter          | S_Shore | chr10:70320130-70320822   |
| cg12630147 | chr1  | 70321574  | + | TET1         | promoter          | S_Shore | chr10:70320130-70320822   |
| cg02774862 | chr1  | 70321580  | + | TET1         | promoter          | S_Shore | chr10:70320130-70320822   |
| cg17608103 | chr6  | 169653612 | + | THBS2        | promoter          | OpenSea |                           |
| cg18490616 | chr2  | 88469792  | + | THNSL2       | promoter          | Island  | chr2:88469691-88470386    |
| cg02455397 | chr1  | 119293385 | + | THY1         | promoter          | Island  | chr11:119293320-119293943 |
| cg13486354 | chr2  | 32931082  | - | TIAM1        | promoter          | Island  | chr21:32929927-32932017   |
| cg16867777 | chr2  | 32932073  | + | TIAM1        | promoter          | S_Shore | chr21:32929927-32932017   |
| cg00498604 | chr4  | 166793789 | + | TLL1         | promoter          | N_Shore | chr4:166794545-166795341  |
| cg08908184 | chr1  | 102890974 | + | TLX1         | promoter          | N_Shore | chr10:102891010-102891794 |
| cg03020810 | chr1  | 102890984 | + | TLX1; TLX1NB | promoter          | N_Shore | chr10:102891010-102891794 |
| cg21492832 | chr1  | 105993308 | - | TMEM121      | promoter          | Island  | chr14:105992499-105996414 |
| cg08774452 | chr1  | 128850550 | - | TMEM132C     | body              | Island  | chr12:128850549-128850755 |
| cg18505401 | chr7  | 19812570  | - | TMEM196      | promoter          | Island  | chr7:19812569-19813005    |
| cg27341472 | chr7  | 19812592  | - | TMEM196      | promoter          | Island  | chr7:19812569-19813005    |
| cg15042080 | chr8  | 109799756 | + | TMEM74       | promoter_and_body | Island  | chr8:109799429-109799847  |
| cg10061361 | chr4  | 122078167 | - | TNIP3; TNIP3 | body              | OpenSea |                           |
| cg26745222 | chr2  | 42543878  | + | TOX2         | promoter_and_body | Island  | chr20:42543097-42545137   |
| cg07665260 | chr2  | 42544086  | + | TOX2         | promoter_and_body | Island  | chr20:42543097-42545137   |
| cg23540518 | chr1  | 228604566 | - | TRIM17       | promoter_and_body | Island  | chr1:228603706-228604567  |
| cg15497761 | chr1  | 155147397 | - | TRIM46       | body              | Island  | chr1:155147185-155147444  |
| cg19275632 | chr1  | 38443950  | - | TRPC4        | promoter          | Island  | chr13:38443682-38444228   |
| cg24994173 | chr5  | 110408997 | - | TSLP         | promoter_and_body | Island  | chr5:110408704-110409039  |
| cg15558982 | chr1  | 115632262 | - | TSPAN2       | promoter          | Island  | chr1:115631850-115632584  |
| cg06043114 | chr1  | 115632455 | - | TSPAN2       | promoter          | Island  | chr1:115631850-115632584  |
| cg27363327 | chr6  | 43211208  | - | TTBK1        | promoter          | Island  | chr6:43211114-43211345    |
| cg16620382 | chr6  | 43211213  | - | TTBK1        | promoter          | Island  | chr6:43211114-43211345    |
| cg15241920 | chr1  | 54926514  | + | TTYH1        | promoter          | N_Shore | chr19:54927902-54928225   |
| cg04043591 | chr7  | 19155806  | + | TWIST1       | none              | N_Shore | chr7:19156050-19158042    |
| cg14859874 | chr1  | 154238265 | + | UBAP2L       | body              | OpenSea |                           |

|            |           |               |   |             |                   |         |                              |
|------------|-----------|---------------|---|-------------|-------------------|---------|------------------------------|
| cg24917673 | chr1<br>9 | 1779875<br>5  | + | UNC13A      | body              | Island  | chr19:1779867<br>9-17799329  |
| cg12903638 | chr2      | 2106363<br>50 | - | UNC80       | promoter          | Island  | chr2:21063634<br>4-210636935 |
| cg24915947 | chr2      | 2106367<br>83 | - | UNC80       | promoter_and_body | Island  | chr2:21063634<br>4-210636935 |
| cg24588482 | chr1      | 1603702<br>53 | - | VANGL2      | promoter          | Island  | chr1:16037011<br>2-160370658 |
| cg07821427 | chr1<br>6 | 7782241<br>9  | - | VAT1L       | promoter          | Island  | chr16:7782237<br>5-77823134  |
| cg25602490 | chr1      | 1085070<br>78 | + | VAV3        | body              | N_Shore | chr1:10850725<br>1-108507841 |
| cg23885415 | chr2      | 7112725<br>5  | + | VAX2        | promoter          | Island  | chr2:71126720-<br>71129209   |
| cg20518889 | chr2      | 7112752<br>9  | - | VAX2        | promoter          | Island  | chr2:71126720-<br>71129209   |
| cg03595100 | chr2      | 7112753<br>8  | - | VAX2        | promoter          | Island  | chr2:71126720-<br>71129209   |
| cg00567749 | chr5      | 8276790<br>8  | + | VCAN        | promoter          | N_Shore | chr5:82768387-<br>82769268   |
| cg07478641 | chr5      | 8276848<br>8  | - | VCAN        | promoter          | Island  | chr5:82768387-<br>82769268   |
| cg01018701 | chr3      | 1571559<br>98 | + | VEPH1; PTX3 | body              | S_Shore | chr3:15715526<br>7-157155826 |
| cg16566171 | chr7      | 1008095<br>07 | - | VGF         | promoter          | S_Shore | chr7:10080627<br>9-100809064 |
| cg12615137 | chr3      | 8704028<br>6  | + | VGLL3       | promoter          | Island  | chr3:87039610-<br>87040516   |
| cg07558275 | chr3      | 8704073<br>9  | + | VGLL3       | promoter          | S_Shore | chr3:87039610-<br>87040516   |
| cg11973177 | chr1<br>0 | 1727100<br>6  | + | VIM         | promoter          | Island  | chr10:1727043<br>0-17272617  |
| cg26983469 | chr1<br>0 | 1727105<br>1  | + | VIM         | promoter          | Island  | chr10:1727043<br>0-17272617  |
| cg22388634 | chr2<br>0 | 2505842<br>9  | + | VSX1        | body              | Island  | chr20:2505828<br>8-25058726  |
| cg00063174 | chr2      | 2287362<br>53 | + | WDR69       | promoter          | Island  | chr2:22873623<br>0-228736544 |
| cg20647610 | chr2      | 2287362<br>58 | + | WDR69       | promoter          | Island  | chr2:22873623<br>0-228736544 |
| cg23807890 | chr2      | 2287363<br>57 | + | WDR69       | promoter_and_body | Island  | chr2:22873623<br>0-228736544 |
| cg26831241 | chr2      | 1755469<br>16 | - | WIPF1       | promoter          | Island  | chr2:17554686<br>2-175547880 |
| cg25537217 | chr2      | 1755471<br>23 | - | WIPF1       | promoter          | Island  | chr2:17554686<br>2-175547880 |
| cg13563298 | chr9      | 9594805<br>9  | - | WNK2        | body              | S_Shore | chr9:95946147-<br>95947835   |
| cg12379948 | chr1<br>7 | 4489642<br>4  | - | WNT3        | promoter          | Island  | chr17:4489580<br>0-44897025  |
| cg01051310 | chr1      | 2281944<br>43 | + | WNT3A       | promoter          | Island  | chr1:22819409<br>6-228196512 |
| cg05802452 | chr1      | 2281944<br>76 | + | WNT3A       | promoter          | Island  | chr1:22819409<br>6-228196512 |
| cg26841013 | chr1      | 2282480<br>13 | - | WNT3A       | none              | S_Shore | chr1:22824663<br>1-228247197 |
| cg00828602 | chr3      | 5552083<br>4  | - | WNT5A       | body              | Island  | chr3:55520226-<br>55522344   |
| cg02708401 | chr3      | 5552152<br>9  | + | WNT5A       | promoter          | Island  | chr3:55520226-<br>55522344   |
| cg07657743 | chr3      | 1392068<br>9  | - | WNT7A       | body              | Island  | chr3:13919939-<br>13922335   |
| cg01755467 | chr8      | 3089061<br>7  | + | WRN; PURG   | promoter_and_body | OpenSea |                              |
| cg18324126 | chr8      | 3089062<br>0  | + | WRN; PURG   | promoter_and_body | OpenSea |                              |
| cg22773661 | chr4      | 4849222<br>5  | - | ZAR1        | promoter          | Island  | chr4:48492117-<br>48493589   |

|            |       |           |   |        |                   |         |                           |
|------------|-------|-----------|---|--------|-------------------|---------|---------------------------|
| cg14906390 | chr11 | 113930251 | - | ZBTB16 | promoter          | Island  | chr11:113929633-113932190 |
| cg09768093 | chr1  | 32930511  | + | ZBTB8B | promoter          | Island  | chr1:32930500-32931061    |
| cg12758636 | chr10 | 31609882  | + | ZEB1   | promoter_and_body | Island  | chr10:31607227-31610094   |
| cg18465286 | chr10 | 31609896  | + | ZEB1   | promoter_and_body | Island  | chr10:31607227-31610094   |
| cg23712359 | chr10 | 31609905  | - | ZEB1   | promoter_and_body | Island  | chr10:31607227-31610094   |
| cg06944257 | chr17 | 49815987  | - | ZFP3   | promoter          | Island  | chr17:4981357-4981979     |
| cg12019773 | chr19 | 38146906  | - | ZFP30  | promoter          | Island  | chr19:38145826-38147219   |
| cg25480336 | chr20 | 50720908  | - | ZFP64  | body              | N_Shore | chr20:50721310-50721912   |
| cg14032025 | chr20 | 50721129  | + | ZFP64  | body              | N_Shore | chr20:50721310-50721912   |
| cg23468878 | chr3  | 147126425 | + | ZIC1   | promoter          | N_Shore | chr3:147126988-147128999  |
| cg24714905 | chr13 | 100637241 | + | ZIC2   | body              | Island  | chr13:100637112-100637472 |
| cg07406191 | chr3  | 147105190 | + | ZIC4   | body              | N_Shelf | chr3:147108511-147111703  |
| cg17655978 | chr19 | 58125659  | - | ZNF134 | promoter          | Island  | chr19:58125530-58125902   |
| cg02835214 | chr19 | 58125672  | - | ZNF134 | promoter          | Island  | chr19:58125530-58125902   |
| cg07697981 | chr19 | 58125678  | - | ZNF134 | promoter          | Island  | chr19:58125530-58125902   |
| cg17334978 | chr4  | 331502    | - | ZNF141 | promoter          | Island  | chr4:330162-332068        |
| cg05533953 | chr4  | 331685    | - | ZNF141 | promoter_and_body | Island  | chr4:330162-332068        |
| cg02970696 | chr3  | 125076372 | + | ZNF148 | promoter          | Island  | chr3:125075915-125076481  |
| cg08228914 | chr19 | 53606538  | - | ZNF160 | promoter_and_body | Island  | chr19:53606059-53606784   |
| cg12586262 | chr19 | 53606654  | - | ZNF160 | promoter_and_body | Island  | chr19:53606059-53606784   |
| cg18708075 | chr19 | 52074312  | - | ZNF175 | promoter          | Island  | chr19:52074311-52074536   |
| cg25824543 | chr19 | 52074410  | - | ZNF175 | promoter          | Island  | chr19:52074311-52074536   |
| cg26870460 | chr1  | 69477591  | - | ZNF215 | promoter_and_body | Island  | chr11:6947520-6948212     |
| cg08390760 | chr6  | 28973318  | + | ZNF311 | promoter          | OpenSea |                           |
| cg15171221 | chr6  | 28973328  | + | ZNF311 | promoter          | OpenSea |                           |
| cg09435617 | chr6  | 28973353  | + | ZNF311 | promoter          | OpenSea |                           |
| cg21310336 | chr6  | 28973446  | - | ZNF311 | promoter          | OpenSea |                           |
| cg26883712 | chr6  | 28973466  | - | ZNF311 | promoter          | OpenSea |                           |
| cg24884572 | chr19 | 58661833  | - | ZNF329 | promoter          | Island  | chr19:58661737-58662287   |
| cg12792011 | chr19 | 58661915  | + | ZNF329 | promoter          | Island  | chr19:58661737-58662287   |
| cg11332363 | chr19 | 54023999  | - | ZNF331 | promoter          | Island  | chr19:54023868-54024560   |
| cg07952047 | chr19 | 54024110  | - | ZNF331 | promoter          | Island  | chr19:54023868-54024560   |
| cg25809635 | chr19 | 37341103  | + | ZNF345 | promoter          | Island  | chr19:37340918-37341262   |
| cg03100040 | chr19 | 37341870  | - | ZNF345 | promoter          | Island  | chr19:37341731-37342000   |

|            |           |               |   |                  |                   |         |                              |
|------------|-----------|---------------|---|------------------|-------------------|---------|------------------------------|
| cg24708545 | chr1<br>9 | 5366272<br>3  | + | ZNF347           | promoter          | S_Shore | chr19:5366143<br>0-53661848  |
| cg25835225 | chr1<br>9 | 5249019<br>9  | - | ZNF350           | promoter          | OpenSea |                              |
| cg16580934 | chr1<br>9 | 5249031<br>0  | + | ZNF350           | promoter          | OpenSea |                              |
| cg06695611 | chr2      | 1807263<br>28 | + | ZNF385B; MIR1258 | promoter          | Island  | chr2:18072571<br>7-180726465 |
| cg26335602 | chr6      | 2812961<br>6  | - | ZNF389           | promoter          | OpenSea |                              |
| cg00843623 | chr1<br>9 | 1214616<br>3  | - | ZNF433           | body              | Island  | chr19:1214603<br>0-12146649  |
| cg15079762 | chr1<br>9 | 1214640<br>4  | + | ZNF433           | promoter_and_body | Island  | chr19:1214603<br>0-12146649  |
| cg12868305 | chr1<br>9 | 1214643<br>9  | - | ZNF433           | promoter_and_body | Island  | chr19:1214603<br>0-12146649  |
| cg14665716 | chr1<br>9 | 1214650<br>9  | + | ZNF433           | promoter_and_body | Island  | chr19:1214603<br>0-12146649  |
| cg15787284 | chr1<br>9 | 1214662<br>9  | + | ZNF433           | promoter          | Island  | chr19:1214603<br>0-12146649  |
| cg03293697 | chr1<br>9 | 1214663<br>9  | + | ZNF433           | promoter          | Island  | chr19:1214603<br>0-12146649  |
| cg16306498 | chr1<br>9 | 1214669<br>6  | - | ZNF433           | promoter          | S_Shore | chr19:1214603<br>0-12146649  |
| cg01404518 | chr1<br>9 | 1214701<br>0  | - | ZNF433           | promoter          | S_Shore | chr19:1214603<br>0-12146649  |
| cg09669356 | chr1<br>9 | 3715756<br>5  | + | ZNF461           | promoter          | N_Shore | chr19:3715763<br>2-37158119  |
| cg26613140 | chr1<br>9 | 3715777<br>6  | - | ZNF461           | promoter          | Island  | chr19:3715763<br>2-37158119  |
| cg00498155 | chr1<br>9 | 3715787<br>9  | - | ZNF461           | promoter          | Island  | chr19:3715763<br>2-37158119  |
| cg27545919 | chr1<br>9 | 3715799<br>5  | - | ZNF461           | promoter          | Island  | chr19:3715763<br>2-37158119  |
| cg01485075 | chr1<br>9 | 2281737<br>1  | + | ZNF492           | promoter          | Island  | chr19:2281727<br>4-22817546  |
| cg02073558 | chr3      | 4477097<br>3  | - | ZNF501           | promoter          | Island  | chr3:44770936-<br>44771137   |
| cg12476763 | chr1<br>9 | 5811164<br>7  | - | ZNF530           | body              | Island  | chr19:5811122<br>9-58111770  |
| cg06458239 | chr1<br>9 | 5803857<br>3  | - | ZNF549           | promoter          | Island  | chr19:5803857<br>2-58039208  |
| cg10729426 | chr1<br>9 | 5803858<br>5  | - | ZNF549           | promoter          | Island  | chr19:5803857<br>2-58039208  |
| cg19060970 | chr1<br>9 | 5803858<br>8  | - | ZNF549           | promoter          | Island  | chr19:5803857<br>2-58039208  |
| cg11497957 | chr8      | 1259858<br>46 | + | ZNF572           | promoter          | OpenSea |                              |
| cg12738197 | chr8      | 1259858<br>83 | + | ZNF572           | promoter          | OpenSea |                              |
| cg11287850 | chr1<br>9 | 3526415<br>8  | + | ZNF599           | promoter          | Island  | chr19:3526364<br>8-35264275  |
| cg03293882 | chr1<br>9 | 5253143<br>8  | + | ZNF614           | promoter          | Island  | chr19:5253132<br>3-52531724  |
| cg05165378 | chr7      | 9915573<br>9  | + | ZNF655           | promoter          | N_Shore | chr7:99155871-<br>99156969   |
| cg21950525 | chr7      | 9915576<br>7  | + | ZNF655           | promoter          | N_Shore | chr7:99155871-<br>99156969   |
| cg12457529 | chr7      | 9915589<br>2  | - | ZNF655           | promoter          | Island  | chr7:99155871-<br>99156969   |
| cg22758700 | chr7      | 9915612<br>6  | - | ZNF655           | promoter_and_body | Island  | chr7:99155871-<br>99156969   |
| cg05312305 | chr7      | 9915638<br>7  | - | ZNF655           | promoter_and_body | Island  | chr7:99155871-<br>99156969   |
| cg17693420 | chr7      | 9915705<br>9  | - | ZNF655           | promoter          | S_Shore | chr7:99155871-<br>99156969   |
| cg24384244 | chr3      | 4294769<br>0  | - | ZNF662           | promoter_and_body | Island  | chr3:42947480-<br>42948170   |

|            |           |               |   |         |                   |         |                              |
|------------|-----------|---------------|---|---------|-------------------|---------|------------------------------|
| cg19361542 | chr1<br>9 | 2386998<br>5  | + | ZNF675  | promoter_and_body | OpenSea |                              |
| cg24114314 | chr1<br>9 | 5375823<br>3  | - | ZNF677  | promoter          | S_Shore | chr19:5375781<br>9-53758148  |
| cg27517351 | chr1<br>9 | 2394187<br>1  | - | ZNF681  | promoter          | S_Shore | chr19:2394124<br>0-23941538  |
| cg10598034 | chr1<br>9 | 5307330<br>9  | - | ZNF701  | promoter          | Island  | chr19:5307330<br>8-53074039  |
| cg16040993 | chr1<br>9 | 5349644<br>0  | - | ZNF702P | body              | N_Shore | chr19:5349673<br>2-53497028  |
| cg19429281 | chr1<br>9 | 5349673<br>8  | + | ZNF702P | body              | Island  | chr19:5349673<br>2-53497028  |
| cg10734240 | chr1<br>9 | 3732909<br>0  | + | ZNF790  | promoter          | Island  | chr19:3732889<br>6-37329518  |
| cg18876786 | chr1<br>9 | 3732938<br>1  | + | ZNF790  | promoter          | Island  | chr19:3732889<br>6-37329518  |
| cg09567473 | chr1<br>9 | 3732940<br>3  | + | ZNF790  | promoter          | Island  | chr19:3732889<br>6-37329518  |
| cg07482795 | chr1<br>9 | 3799773<br>0  | - | ZNF793  | promoter          | N_Shore | chr19:3799779<br>0-37998125  |
| cg22510337 | chr1<br>9 | 5839996<br>7  | + | ZNF814  | body              | Island  | chr19:5839994<br>5-58400276  |
| cg15746696 | chr1<br>9 | 5840049<br>4  | + | ZNF814  | promoter          | S_Shore | chr19:5839994<br>5-58400276  |
| cg21540810 | chr1<br>9 | 5314137<br>2  | + | ZNF83   | promoter_and_body | Island  | chr19:5314117<br>5-53141813  |
| cg08351203 | chr1<br>9 | 5314179<br>3  | - | ZNF83   | promoter_and_body | Island  | chr19:5314117<br>5-53141813  |
| cg06476192 | chr1<br>6 | 3145394<br>8  | + | ZNF843  | promoter          | Island  | chr16:3145394<br>3-31454561  |
| cg12561338 | chr1<br>9 | 1217550<br>5  | + | ZNF844  | promoter          | Island  | chr19:1217546<br>0-12176057  |
| cg05015306 | chr1<br>9 | 1216312<br>7  | - | ZNF878  | body              | N_Shore | chr19:1216332<br>6-12163560  |
| cg19022827 | chr1<br>9 | 1216353<br>3  | - | ZNF878  | body              | Island  | chr19:1216332<br>6-12163560  |
| cg26626525 | chr1<br>9 | 1216358<br>2  | + | ZNF878  | body              | S_Shore | chr19:1216332<br>6-12163560  |
| cg18235573 | chr1<br>9 | 1216398<br>4  | + | ZNF878  | body              | S_Shore | chr19:1216332<br>6-12163560  |
| cg00432059 | chr1<br>9 | 2001248<br>9  | + | ZNF93   | body              | S_Shore | chr19:2001191<br>0-20012238  |
| cg02622316 | chr6      | 2836741<br>0  | + | ZSCAN12 | promoter_and_body | Island  | chr6:28367124-<br>28367651   |
| cg14145801 | chr2      | 1877137<br>11 | - | ZSWIM2  | body              | N_Shore | chr2:18771384<br>6-187714069 |
