# Supplementary material
Source: HighWire-hosted journal article supplement (https://gut.bmj.com/content/68/3/389)
Supplement: inline-supplementary-material-7 [file inline-supplementary-material-7.pdf]

**Supplemental Table 3: TCGA EAC demographic information.**

| TCGA EAC Cohort                         |        | TCGA All (n=87) | HM (n=25) | IM (n=26) | LM (n=20)  | MM (n=16)  |
|-----------------------------------------|--------|-----------------|-----------|-----------|------------|------------|
| Age (mean±SD)                           |        | 66.9±12.1       |           |           |            |            |
| Gender (n, %)                           | Male   | 75, 86%         | 20, 80%   | 23, 88%   | 18, 90%    | 14, 88%    |
|                                         | Female | 12, 14%         | 5, 20%    | 3, 12%    | 2, 10%     | 2, 12%     |
| History BE (% Yes, NA = 7)              |        | 35%             | 50%       | 32%       | 24%        | 31%        |
| History Reflux Disease (% Yes, NA = 13) |        | 57%             | 65%       | 65%       | 50%        | 38%        |
| Weight (mean±SD kg, NA = 1)             |        | 86±19.9         | 86.1±16.4 | 87.9±19.7 | 85.7±29.0  | 83.2±11.6  |
| Height (mean±SD cm, NA = 5)             |        | 174.4±9.4       | 175.2±9.6 | 174.5±8.8 | 173.6±10.3 | 174.1±10.1 |
| BMI (mean±SD kg/m2, NA = 5)             |        | 28.4±6.5        | 28.3±4.7  | 29.0±6.7  | 28.5±9.7   | 27.4±4.3   |
