# Supplementary material
Source: HighWire-hosted journal article supplement (https://gut.bmj.com/content/68/3/389)
Supplement: inline-supplementary-material-11 [file inline-supplementary-material-11.pdf]

**Supplemental Table 5: Summary of somatic genomic alterations in BETRNet EACs.**

| Gene_ID | Pathway              | SNV |     |     |     | CNV_High_Gain |     |     |     | CNV_Two_Copy_Loss |     |     |    | Total % Altered |     |     |     |
|---------|----------------------|-----|-----|-----|-----|---------------|-----|-----|-----|-------------------|-----|-----|----|-----------------|-----|-----|-----|
|         |                      | HM  | IM  | LM  | MM  | HM            | IM  | LM  | MM  | HM                | IM  | LM  | MM | HM              | IM  | LM  | MM  |
| TP53    | p53                  | 71% | 80% | 86% | 50% | NA            | NA  | NA  | NA  | 0%                | 0%  | 0%  | 0% | 71%             | 80% | 86% | 50% |
| ATM     | p53                  | 0%  | 0%  | 0%  | 0%  | NA            | NA  | NA  | NA  | 0%                | 20% | 0%  | 0% | 0%              | 0%  | 0%  | 0%  |
| ARID1A  | Chromatin remodeling | 14% | 20% | 29% | 0%  | NA            | NA  | NA  | NA  | 0%                | 20% | 0%  | 0% | 14%             | 40% | 29% | 0%  |
| ARID1B  | Chromatin remodeling | 0%  | 0%  | 14% | 0%  | NA            | NA  | NA  | NA  | 0%                | 0%  | 0%  | 0% | 0%              | 0%  | 14% | 0%  |
| ERBB2   | ERBB/MET             | 43% | 20% | 0%  | 0%  | 57%           | 0%  | 0%  | 25% | NA                | NA  | NA  | NA | 86%             | 20% | 0%  | 25% |
| ERBB4   | ERBB/MET             | 0%  | 20% | 0%  | 0%  | 0%            | 0%  | 0%  | 0%  | NA                | NA  | NA  | NA | 0%              | 20% | 0%  | 0%  |
| EGFR    | ERBB/MET             | 0%  | 0%  | 0%  | 0%  | 0%            | 20% | 0%  | 0%  | NA                | NA  | NA  | NA | 0%              | 20% | 0%  | 0%  |
| MET     | ERBB/MET             | 0%  | 0%  | 0%  | 0%  | 0%            | 0%  | 14% | 0%  | NA                | NA  | NA  | NA | 0%              | 0%  | 14% | 0%  |
| KRAS    | ERBB/MET             | 0%  | 0%  | 0%  | 0%  | 0%            | 40% | 0%  | 0%  | NA                | NA  | NA  | NA | 0%              | 40% | 0%  | 0%  |
| NRAS    | ERBB/MET             | 0%  | 0%  | 0%  | 0%  | 14%           | 0%  | 0%  | 0%  | NA                | NA  | NA  | NA | 14%             | 0%  | 0%  | 0%  |
| CDKN2B  | Cell cycle           | 0%  | 0%  | 0%  | 0%  | NA            | NA  | NA  | NA  | 0%                | 0%  | 29% | 0% | 0%              | 0%  | 0%  | 0%  |
| CDKN2A  | Cell cycle           | 14% | 0%  | 33% | 0%  | NA            | NA  | NA  | NA  | 0%                | 0%  | 33% | 0% | 14%             | 0%  | 67% | 0%  |
| CDK6    | Cell cycle           | 0%  | 0%  | 0%  | 0%  | 0%            | 0%  | 14% | 0%  | NA                | NA  | NA  | NA | 0%              | 0%  | 14% | 0%  |
| RB1     | Cell cycle           | 0%  | 0%  | 0%  | 25% | NA            | NA  | NA  | NA  | 0%                | 0%  | 0%  | 0% | 0%              | 0%  | 0%  | 25% |
