# Supplementary material
Source: HighWire-hosted journal article supplement (https://gut.bmj.com/content/68/3/389)
Supplement: inline-supplementary-material-13 [file inline-supplementary-material-13.pdf]

**Supplemental Table 6: Summary of somatic genomic alterations in TCGA EACs**

|         |                      | SNV |     |     |     | CNV_High_Gain |     |     |     | CNV_Two_Copy_Loss |     |     |     | Total % Altered |     |     |     |
|---------|----------------------|-----|-----|-----|-----|---------------|-----|-----|-----|-------------------|-----|-----|-----|-----------------|-----|-----|-----|
| Gene_ID | Pathway              | HM  | IM  | LM  | MM  | HM            | IM  | LM  | MM  | HM                | IM  | LM  | MM  | HM              | IM  | LM  | MM  |
| TP53    | p53                  | 72% | 81% | 70% | 69% | NA            | NA  | NA  | NA  | 4%                | 4%  | 0%  | 13% | 76%             | 85% | 70% | 82% |
| ATM     | p53                  | 8%  | 0%  | 5%  | 0%  | NA            | NA  | NA  | NA  | 4%                | 0%  | 0%  | 6%  | 12%             | 0%  | 5%  | 6%  |
| ARID1A  | Chromatin remodeling | 24% | 8%  | 5%  | 6%  | NA            | NA  | NA  | NA  | 0%                | 4%  | 0%  | 0%  | 24%             | 12% | 5%  | 6%  |
| ARID1B  | Chromatin remodeling | 0%  | 0%  | 5%  | 0%  | NA            | NA  | NA  | NA  | 0%                | 0%  | 0%  | 6%  | 0%              | 0%  | 5%  | 6%  |
| ERBB2   | ERBB/MET             | 12% | 8%  | 0%  | 0%  | 20%           | 27% | 5%  | 13% | NA                | NA  | NA  | NA  | 28%             | 31% | 5%  | 13% |
| ERBB4   | ERBB/MET             | 0%  | 8%  | 10% | 0%  | 0%            | 0%  | 0%  | 0%  | NA                | NA  | NA  | NA  | 0%              | 8%  | 10% | 0%  |
| EGFR    | ERBB/MET             | 0%  | 0%  | 0%  | 0%  | 8%            | 12% | 0%  | 0%  | NA                | NA  | NA  | NA  | 8%              | 12% | 0%  | 0%  |
| MET     | ERBB/MET             | 0%  | 0%  | 0%  | 0%  | 4%            | 0%  | 0%  | 0%  | NA                | NA  | NA  | NA  | 4%              | 0%  | 0%  | 0%  |
| KRAS    | ERBB/MET             | 8%  | 4%  | 0%  | 0%  | 8%            | 8%  | 20% | 0%  | NA                | NA  | NA  | NA  | 16%             | 12% | 20% | 0%  |
| NRAS    | ERBB/MET             | 0%  | 0%  | 0%  | 0%  | 0%            | 4%  | 0%  | 0%  | NA                | NA  | NA  | NA  | 0%              | 4%  | 0%  | 0%  |
| CDKN2B  | Cell cycle           | 0%  | 0%  | 0%  | 0%  | NA            | NA  | NA  | NA  | 12%               | 15% | 10% | 19% | 12%             | 15% | 10% | 19% |
| CDKN2A  | Cell cycle           | 8%  | 15% | 25% | 0%  | NA            | NA  | NA  | NA  | 16%               | 15% | 10% | 19% | 24%             | 30% | 35% | 19% |
| CDK6    | Cell cycle           | 4%  | 0%  | 0%  | 0%  | 0%            | 19% | 5%  | 6%  | NA                | NA  | NA  | NA  | 4%              | 19% | 5%  | 6%  |
| RB1     | Cell cycle           | 8%  | 0%  | 5%  | 0%  | NA            | NA  | NA  | NA  | 0%                | 4%  | 0%  | 0%  | 8%              | 4%  | 5%  | 0%  |
