# Supplementary material
Source: HighWire-hosted journal article supplement (https://gut.bmj.com/content/68/3/389)
Supplement: inline-supplementary-material-15 [file inline-supplementary-material-15.pdf]

**Supplemental Table 7: Summary of somatic genomic alterations in combined BETRNet and TCGA cohorts**

|         |                      | SNV |     |     |     | CNV_High_Gain |     |     |     | CNV_Two_Copy_Loss |     |     |     | Total % Altered |     |     |     |
|---------|----------------------|-----|-----|-----|-----|---------------|-----|-----|-----|-------------------|-----|-----|-----|-----------------|-----|-----|-----|
| Gene_ID | Pathway              | HM  | IM  | LM  | MM  | HM            | IM  | LM  | MM  | HM                | IM  | LM  | MM  | HM              | IM  | LM  | MM  |
| TP53    | p53                  | 72% | 81% | 74% | 65% | NA            | NA  | NA  | NA  | 6%                | 3%  | 0%  | 10% | 78%             | 84% | 74% | 75% |
| ATM     | p53                  | 6%  | 0%  | 4%  | 0%  | NA            | NA  | NA  | NA  | 3%                | 3%  | 0%  | 5%  | 9%              | 3%  | 4%  | 5%  |
| ARID1A  | Chromatin remodeling | 22% | 10% | 11% | 5%  | NA            | NA  | NA  | NA  | 0%                | 6%  | 0%  | 0%  | 22%             | 16% | 11% | 5%  |
| ARID1B  | Chromatin remodeling | 0%  | 0%  | 7%  | 0%  | NA            | NA  | NA  | NA  | 0%                | 0%  | 0%  | 5%  | 0%              | 0%  | 7%  | 5%  |
| ERBB2   | ERBB/MET             | 19% | 12% | 0%  | 0%  | 28%           | 23% | 4%  | 15% | NA                | NA  | NA  | NA  | 41%             | 32% | 4%  | 15% |
| ERBB4   | ERBB/MET             | 0%  | 8%  | 10% | 0%  | 0%            | 0%  | 0%  | 0%  | NA                | NA  | NA  | NA  | 0%              | 8%  | 10% | 0%  |
| EGFR    | ERBB/MET             | 0%  | 0%  | 0%  | 0%  | 6%            | 13% | 0%  | 0%  | NA                | NA  | NA  | NA  | 6%              | 13% | 0%  | 0%  |
| MET     | ERBB/MET             | 0%  | 0%  | 0%  | 0%  | 3%            | 0%  | 4%  | 0%  | NA                | NA  | NA  | NA  | 3%              | 0%  | 4%  | 0%  |
| KRAS    | ERBB/MET             | 6%  | 3%  | 0%  | 0%  | 6%            | 13% | 15% | 0%  | NA                | NA  | NA  | NA  | 12%             | 16% | 15% | 0%  |
| NRAS    | ERBB/MET             | 0%  | 0%  | 0%  | 0%  | 3%            | 3%  | 0%  | 0%  | NA                | NA  | NA  | NA  | 3%              | 3%  | 0%  | 0%  |
| CDKN2B  | Cell cycle           | 0%  | 0%  | 0%  | 0%  | NA            | NA  | NA  | NA  | 9%                | 13% | 15% | 15% | 12%             | 15% | 10% | 19% |
| CDKN2A  | Cell cycle           | 9%  | 13% | 26% | 0%  | NA            | NA  | NA  | NA  | 13%               | 13% | 15% | 15% | 22%             | 26% | 41% | 15% |
| CDK6    | Cell cycle           | 3%  | 0%  | 0%  | 0%  | 0%            | 16% | 7%  | 5%  | NA                | NA  | NA  | NA  | 3%              | 16% | 7%  | 5%  |
| RB1     | Cell cycle           | 6%  | 0%  | 4%  | 5%  | NA            | NA  | NA  | NA  | 0%                | 3%  | 0%  | 0%  | 6%              | 3%  | 4%  | 5%  |
