# Supplementary material
Source: HighWire-hosted journal article supplement (https://gut.bmj.com/content/68/3/389)
Supplement: inline-supplementary-material-17 [file inline-supplementary-material-17.pdf]

**Supplemental Table 8:**  
**Epigenetically repressed**  
**genes in the HM, IM, and**  
**LM EAC subtypes.**

| gene_symbol | subtype |
|-------------|---------|
| ADAM23      | HM      |
| APCDD1L     | HM      |
| BNC2        | HM      |
| C1orf114    | HM      |
| C3orf14     | HM      |
| C3orf15     | HM      |
| COL14A1     | HM      |
| DNAH14      | HM      |
| DNAJC6      | HM      |
| DPY19L2     | HM      |
| ECHDC3      | HM      |
| EFHA2       | HM      |
| ELOVL4      | HM      |
| EVC         | HM      |
| FBN1        | HM      |
| GFRA3       | HM      |
| GPR150      | HM      |
| GRIN2A      | HM      |
| HLF         | HM      |
| HUNK        | HM      |
| LMX1B       | HM      |
| NRN1        | HM      |
| PCSK1       | HM      |
| PEG10       | HM      |
| PLAC2       | HM      |
| PTPN13      | HM      |
| RGS6        | HM      |
| RIC3        | HM      |
| RNLS        | HM      |
| RRAGD       | HM      |
| SHISA2      | HM      |
| SLCO4C1     | HM      |
| SNCA        | HM      |
| TFAP2C      | HM      |
| TIAM1       | HM      |
| TUSC1       | HM      |
| ZBTB10      | HM      |

|          |    |
|----------|----|
| ZFHX4    | HM |
| ZFP30    | HM |
| ZFP82    | HM |
| ZNF134   | HM |
| ZNF160   | HM |
| ZNF256   | HM |
| ZNF329   | HM |
| ZNF433   | HM |
| ZNF470   | HM |
| ZNF571   | HM |
| ZNF583   | HM |
| ZNF606   | HM |
| ZNF649   | HM |
| ADHFE1   | IM |
| ATP6V0E2 | IM |
| C2orf74  | IM |
| C5orf42  | IM |
| CDK5R2   | IM |
| CLDN18   | IM |
| CLIC6    | IM |
| CR1      | IM |
| CTF1     | IM |
| FGF2     | IM |
| GATA4    | IM |
| GGT6     | IM |
| IGFBP2   | IM |
| IRX3     | IM |
| LONRF2   | IM |
| MAP9     | IM |
| MPV17L   | IM |
| NEDD4L   | IM |
| PCLO     | IM |
| PIK3C2G  | IM |
| STK33    | IM |
| TLL1     | IM |
| TMEM220  | IM |
| VSIG2    | IM |
| ZFP3     | IM |
| ZNF354C  | IM |
| ZNF471   | IM |
| ZNF569   | IM |

|          |       |
|----------|-------|
| ZNF570   | IM    |
| ZNF662   | IM    |
| ZNF844   | IM    |
| MYEF2    | LM    |
| TSPYL5   | LM    |
| AS3MT    | HM;IM |
| DCBLD2   | HM;IM |
| ENPP5    | HM;IM |
| ESYT3    | HM;IM |
| HDGFRP3  | HM;IM |
| KIAA1529 | HM;IM |
| MLF1     | HM;IM |
| PAIP2B   | HM;IM |
| PPP1R9A  | HM;IM |
| PRDM5    | HM;IM |
| SERP2    | HM;IM |
| SOX21    | HM;IM |
| ZDBF2    | HM;IM |
| ZNF141   | HM;IM |
| ZNF287   | HM;IM |
| ZNF502   | HM;IM |
| ZNF518B  | HM;IM |
| ZNF559   | HM;IM |
| ZNF879   | HM;IM |
| GREB1L   | IM;LM |
