# Supplementary material
Source: HighWire-hosted journal article supplement (https://gut.bmj.com/content/68/3/389)
Supplement: inline-supplementary-material-20 [file inline-supplementary-material-20.pdf]

**Supplemental Table 10: Results of differential miRNA (DEmiR) and differential target gene (DETG) testing between HM and each other EAC subtype. From left to right, columns are the DETG ID, mean HM DETG expression, mean non-HM DETG expression from the comparison, the DEmiR ID, the mean DEmiR expression difference (mean difference, HM minus non-HM), and the subtype comparison (HM vs. IM, LM, or MM).**

| DETG      | HM.expr.target | NonHM.expr.target | DEmiR           | miR.dif | targetgene.symbol | test     |
|-----------|----------------|-------------------|-----------------|---------|-------------------|----------|
| MARK1     | -3.167         | -1.781            | hsa-miR-486-5p  | 1.209   | MARK1             | HM-vs-IM |
| FRAS1     | 0.073          | 1.294             | hsa-miR-3136-5p | 1.077   | FRAS1             | HM-vs-IM |
| LRP4      | -0.350         | -1.455            | hsa-miR-2355-5p | -1.331  | LRP4              | HM-vs-IM |
| NGEF      | 0.476          | -0.664            | miR-103a-2-5p   | -1.421  | NGEF              | HM-vs-LM |
| SMPD3     | -0.226         | -1.273            | miR-103a-2-5p   | -1.421  | SMPD3             | HM-vs-LM |
| ADAM19    | -0.383         | 0.626             | miR-182-5p      | 1.641   | ADAM19            | HM-vs-LM |
| ADAMTS18  | -5.274         | -3.889            | miR-182-5p      | 1.641   | ADAMTS18          | HM-vs-LM |
| AGPAT4    | -0.728         | 0.358             | miR-182-5p      | 1.641   | AGPAT4            | HM-vs-LM |
| AS3MT     | -2.958         | -0.866            | miR-182-5p      | 1.641   | AS3MT             | HM-vs-LM |
| B4GALNT1  | -1.048         | 0.502             | miR-182-5p      | 1.641   | B4GALNT1          | HM-vs-LM |
| C20orf194 | -2.918         | -1.802            | miR-182-5p      | 1.641   | C20orf194         | HM-vs-LM |
| CACNA2D2  | -4.575         | -3.137            | miR-182-5p      | 1.641   | CACNA2D2          | HM-vs-LM |
| CADM1     | -2.388         | -0.264            | miR-182-5p      | 1.641   | CADM1             | HM-vs-LM |
| CHIC1     | -1.731         | -0.667            | miR-182-5p      | 1.641   | CHIC1             | HM-vs-LM |

|           |        |        |            |       |           |          |
|-----------|--------|--------|------------|-------|-----------|----------|
| CHST10    | -2.521 | -1.360 | miR-182-5p | 1.641 | CHST10    | HM-vs-LM |
| CHST11    | -1.093 | -0.028 | miR-182-5p | 1.641 | CHST11    | HM-vs-LM |
| DYNC1I1   | -3.052 | -1.341 | miR-182-5p | 1.641 | DYNC1I1   | HM-vs-LM |
| EPDR1     | -1.718 | 0.737  | miR-182-5p | 1.641 | EPDR1     | HM-vs-LM |
| FAM110B   | -3.025 | -1.466 | miR-182-5p | 1.641 | FAM110B   | HM-vs-LM |
| FBXO27    | -3.980 | -1.829 | miR-182-5p | 1.641 | FBXO27    | HM-vs-LM |
| FCN3      | -0.868 | 0.234  | miR-182-5p | 1.641 | FCN3      | HM-vs-LM |
| GRID1     | -0.834 | 0.250  | miR-182-5p | 1.641 | GRID1     | HM-vs-LM |
| HAS2      | -1.026 | 0.104  | miR-182-5p | 1.641 | HAS2      | HM-vs-LM |
| HOXA1     | 0.454  | 1.747  | miR-182-5p | 1.641 | HOXA1     | HM-vs-LM |
| KHDRBS3   | -2.292 | -0.663 | miR-182-5p | 1.641 | KHDRBS3   | HM-vs-LM |
| KIAA1324L | -2.210 | 0.461  | miR-182-5p | 1.641 | KIAA1324L | HM-vs-LM |
| KLF15     | -6.132 | -4.258 | miR-182-5p | 1.641 | KLF15     | HM-vs-LM |
| KLF7      | -1.841 | -0.692 | miR-182-5p | 1.641 | KLF7      | HM-vs-LM |
| LRP3      | -2.706 | -0.617 | miR-182-5p | 1.641 | LRP3      | HM-vs-LM |
| MAF       | -1.826 | -0.760 | miR-182-5p | 1.641 | MAF       | HM-vs-LM |
| MAGEL2    | -2.599 | -1.250 | miR-182-5p | 1.641 | MAGEL2    | HM-vs-LM |
| MAP9      | -3.631 | -1.584 | miR-182-5p | 1.641 | MAP9      | HM-vs-LM |

|         |        |        |            |       |         |          |
|---------|--------|--------|------------|-------|---------|----------|
| MFAP3L  | -1.462 | -0.131 | miR-182-5p | 1.641 | MFAP3L  | HM-vs-LM |
| MPP1    | -0.963 | 0.245  | miR-182-5p | 1.641 | MPP1    | HM-vs-LM |
| NFASC   | -3.251 | -2.123 | miR-182-5p | 1.641 | NFASC   | HM-vs-LM |
| NRCAM   | -0.760 | 0.714  | miR-182-5p | 1.641 | NRCAM   | HM-vs-LM |
| PDPN    | -0.833 | 0.184  | miR-182-5p | 1.641 | PDPN    | HM-vs-LM |
| PEG10   | -2.388 | 0.175  | miR-182-5p | 1.641 | PEG10   | HM-vs-LM |
| PPP1R9A | -4.634 | -1.292 | miR-182-5p | 1.641 | PPP1R9A | HM-vs-LM |
| PRAF2   | -0.704 | 0.487  | miR-182-5p | 1.641 | PRAF2   | HM-vs-LM |
| PRKD1   | -2.651 | -1.628 | miR-182-5p | 1.641 | PRKD1   | HM-vs-LM |
| PTGER3  | -7.008 | -5.596 | miR-182-5p | 1.641 | PTGER3  | HM-vs-LM |
| RBP7    | -3.043 | -1.905 | miR-182-5p | 1.641 | RBP7    | HM-vs-LM |
| RDX     | -2.001 | -0.601 | miR-182-5p | 1.641 | RDX     | HM-vs-LM |
| RNLS    | -5.078 | -3.565 | miR-182-5p | 1.641 | RNLS    | HM-vs-LM |
| SCN9A   | -3.338 | -1.852 | miR-182-5p | 1.641 | SCN9A   | HM-vs-LM |
| SDC2    | -1.911 | -0.786 | miR-182-5p | 1.641 | SDC2    | HM-vs-LM |
| SLC1A2  | -6.587 | -5.358 | miR-182-5p | 1.641 | SLC1A2  | HM-vs-LM |
| SLC2A3  | -0.267 | 0.958  | miR-182-5p | 1.641 | SLC2A3  | HM-vs-LM |
| SOX5    | -3.055 | -1.929 | miR-182-5p | 1.641 | SOX5    | HM-vs-LM |

|            |        |        |             |        |            |          |
|------------|--------|--------|-------------|--------|------------|----------|
| SOX6       | -1.243 | -0.201 | miR-182-5p  | 1.641  | SOX6       | HM-vs-LM |
| ST6GALNAC3 | -1.321 | -0.288 | miR-182-5p  | 1.641  | ST6GALNAC3 | HM-vs-LM |
| SULT1C4    | -1.513 | 0.096  | miR-182-5p  | 1.641  | SULT1C4    | HM-vs-LM |
| TCEAL7     | -2.696 | -1.556 | miR-182-5p  | 1.641  | TCEAL7     | HM-vs-LM |
| TMEM150C   | -1.777 | -0.702 | miR-182-5p  | 1.641  | TMEM150C   | HM-vs-LM |
| TMEM170B   | -1.677 | -0.546 | miR-182-5p  | 1.641  | TMEM170B   | HM-vs-LM |
| TUSC1      | -2.289 | -0.653 | miR-182-5p  | 1.641  | TUSC1      | HM-vs-LM |
| TWIST1     | 0.008  | 1.130  | miR-182-5p  | 1.641  | TWIST1     | HM-vs-LM |
| VGLL3      | -2.205 | -0.739 | miR-182-5p  | 1.641  | VGLL3      | HM-vs-LM |
| ZFP30      | -2.748 | -0.951 | miR-182-5p  | 1.641  | ZFP30      | HM-vs-LM |
| ZNF280B    | -1.443 | 0.837  | miR-182-5p  | 1.641  | ZNF280B    | HM-vs-LM |
| ADRA2A     | 2.619  | 0.743  | miR-130a-5p | -1.032 | ADRA2A     | HM-vs-LM |
| MET        | 1.712  | 0.638  | miR-130a-5p | -1.032 | MET        | HM-vs-LM |
| PNMA2      | 1.062  | -0.156 | miR-130a-5p | -1.032 | PNMA2      | HM-vs-LM |
| RAB27B     | -1.126 | -2.592 | miR-130a-5p | -1.032 | RAB27B     | HM-vs-LM |
| CHST4      | 1.232  | -0.837 | miR-134-5p  | -1.256 | CHST4      | HM-vs-LM |
| EGFR       | -0.310 | -1.597 | miR-134-5p  | -1.256 | EGFR       | HM-vs-LM |
| MLPH       | -0.356 | -1.618 | miR-134-5p  | -1.256 | MLPH       | HM-vs-LM |

|        |        |        |             |        |        |          |
|--------|--------|--------|-------------|--------|--------|----------|
| SLC5A1 | 3.284  | 1.818  | miR-134-5p  | -1.256 | SLC5A1 | HM-vs-LM |
| BASP1  | -1.164 | 0.007  | miR-200c-3p | 1.145  | BASP1  | HM-vs-LM |
| DCBLD2 | -2.569 | -1.131 | miR-200c-3p | 1.145  | DCBLD2 | HM-vs-LM |
| DMD    | -3.683 | -2.498 | miR-200c-3p | 1.145  | DMD    | HM-vs-LM |
| DTNA   | -4.243 | -2.754 | miR-200c-3p | 1.145  | DTNA   | HM-vs-LM |
| DZIP1  | -2.724 | -1.285 | miR-200c-3p | 1.145  | DZIP1  | HM-vs-LM |
| FGD1   | -1.556 | -0.529 | miR-200c-3p | 1.145  | FGD1   | HM-vs-LM |
| GLIS2  | -0.959 | 0.272  | miR-200c-3p | 1.145  | GLIS2  | HM-vs-LM |
| MAP91  | -3.631 | -1.584 | miR-200c-3p | 1.145  | MAP9   | HM-vs-LM |
| MOCS1  | -2.428 | -1.132 | miR-200c-3p | 1.145  | MOCS1  | HM-vs-LM |
| NDN    | -2.763 | -1.314 | miR-200c-3p | 1.145  | NDN    | HM-vs-LM |
| NFASC1 | -3.251 | -2.123 | miR-200c-3p | 1.145  | NFASC  | HM-vs-LM |
| NLGN4X | -2.418 | -0.525 | miR-200c-3p | 1.145  | NLGN4X | HM-vs-LM |
| PCDH19 | -4.037 | -2.689 | miR-200c-3p | 1.145  | PCDH19 | HM-vs-LM |
| PLXNA4 | -4.233 | -2.734 | miR-200c-3p | 1.145  | PLXNA4 | HM-vs-LM |
| PPM1E  | -2.598 | -1.423 | miR-200c-3p | 1.145  | PPM1E  | HM-vs-LM |
| PTPN13 | -3.635 | -1.593 | miR-200c-3p | 1.145  | PTPN13 | HM-vs-LM |
| SDC21  | -1.911 | -0.786 | miR-200c-3p | 1.145  | SDC2   | HM-vs-LM |

|           |        |        |             |        |          |          |
|-----------|--------|--------|-------------|--------|----------|----------|
| SDK2      | -2.592 | -0.388 | miR-200c-3p | 1.145  | SDK2     | HM-vs-LM |
| SGCE      | -1.933 | -0.244 | miR-200c-3p | 1.145  | SGCE     | HM-vs-LM |
| SLC1A21   | -6.587 | -5.358 | miR-200c-3p | 1.145  | SLC1A2   | HM-vs-LM |
| SOX61     | -1.243 | -0.201 | miR-200c-3p | 1.145  | SOX6     | HM-vs-LM |
| SPG20     | -3.241 | -2.113 | miR-200c-3p | 1.145  | SPG20    | HM-vs-LM |
| SYT1      | -2.008 | 0.015  | miR-200c-3p | 1.145  | SYT1     | HM-vs-LM |
| TMEM170B1 | -1.677 | -0.546 | miR-200c-3p | 1.145  | TMEM170B | HM-vs-LM |
| WASF3     | -4.502 | -3.161 | miR-200c-3p | 1.145  | WASF3    | HM-vs-LM |
| ZBTB10    | -2.217 | -0.131 | miR-200c-3p | 1.145  | ZBTB10   | HM-vs-LM |
| DNAH5     | -0.396 | -1.795 | miR-34c-3p  | -1.006 | DNAH5    | HM-vs-LM |
| RASEF     | -0.227 | -1.719 | miR-34c-3p  | -1.006 | RASEF    | HM-vs-LM |
| AGR2      | 0.863  | -0.773 | miR-99b-3p  | -1.273 | AGR2     | HM-vs-LM |
| HOXA11    | 7.277  | 5.571  | miR-374a-5p | -1.029 | HOXA11   | HM-vs-LM |
| MET1      | 1.712  | 0.638  | miR-374a-5p | -1.029 | MET      | HM-vs-LM |
| PNMA21    | 1.062  | -0.156 | miR-379-5p  | -1.717 | PNMA2    | HM-vs-LM |
| F2RL1     | 0.760  | -0.255 | miR-382-5p  | -1.151 | F2RL1    | HM-vs-LM |
| XK        | -0.709 | -2.051 | miR-382-5p  | -1.151 | XK       | HM-vs-LM |
| KCNN4     | 1.382  | 0.301  | miR-431-3p  | -1.261 | KCNN4    | HM-vs-LM |

|         |        |        |             |        |         |          |
|---------|--------|--------|-------------|--------|---------|----------|
| ADRA2A1 | 2.619  | 0.743  | miR-452-5p  | -1.398 | ADRA2A  | HM-vs-LM |
| SDCBP2  | 0.548  | -0.643 | miR-452-5p  | -1.398 | SDCBP2  | HM-vs-LM |
| ZBTB7C  | -1.695 | -3.278 | miR-452-5p  | -1.398 | ZBTB7C  | HM-vs-LM |
| BCAS1   | -1.097 | -2.670 | miR-409-5p  | -1.018 | BCAS1   | HM-vs-LM |
| KCNK1   | 0.762  | -0.354 | miR-409-5p  | -1.018 | KCNK1   | HM-vs-LM |
| XK1     | -0.709 | -2.051 | miR-409-5p  | -1.018 | XK      | HM-vs-LM |
| BARX2   | -1.103 | -3.048 | miR-483-5p  | -1.126 | BARX2   | HM-vs-LM |
| ADRA2A2 | 2.619  | 0.743  | miR-493-5p  | -1.044 | ADRA2A  | HM-vs-LM |
| BHLHE41 | 1.318  | 0.264  | miR-493-5p  | -1.044 | BHLHE41 | HM-vs-LM |
| IRX2    | -2.162 | -4.159 | miR-493-5p  | -1.044 | IRX2    | HM-vs-LM |
| MUC13   | 5.063  | 3.844  | miR-493-5p  | -1.044 | MUC13   | HM-vs-LM |
| RAB27B1 | -1.126 | -2.592 | miR-493-5p  | -1.044 | RAB27B  | HM-vs-LM |
| SLC5A11 | 3.284  | 1.818  | miR-493-5p  | -1.044 | SLC5A1  | HM-vs-LM |
| ZIC2    | 4.633  | 1.073  | miR-493-5p  | -1.044 | ZIC2    | HM-vs-LM |
| CCL28   | 1.146  | -0.420 | miR-450b-5p | -1.014 | CCL28   | HM-vs-LM |
| IRX21   | -2.162 | -4.159 | miR-450b-5p | -1.014 | IRX2    | HM-vs-LM |
| PTPRR   | 1.262  | 0.056  | miR-450b-5p | -1.014 | PTPRR   | HM-vs-LM |
| SIM2    | 0.083  | -1.093 | miR-450b-5p | -1.014 | SIM2    | HM-vs-LM |

|          |        |        |             |        |         |          |
|----------|--------|--------|-------------|--------|---------|----------|
| ADORA2B  | 1.388  | 0.289  | miR-374b-5p | -1.288 | ADORA2B | HM-vs-LM |
| HOXA111  | 7.277  | 5.571  | miR-374b-5p | -1.288 | HOXA11  | HM-vs-LM |
| FUT3     | 1.164  | -0.465 | miR-2355-5p | -1.947 | FUT3    | HM-vs-LM |
| FUT6     | 0.019  | -1.396 | miR-2355-5p | -1.947 | FUT6    | HM-vs-LM |
| GJB4     | 2.654  | 0.930  | miR-2355-5p | -1.947 | GJB4    | HM-vs-LM |
| JUP      | 1.057  | 0.053  | miR-2355-5p | -1.947 | JUP     | HM-vs-LM |
| NR1I2    | 3.318  | 1.256  | miR-2355-5p | -1.947 | NR1I2   | HM-vs-LM |
| PPP1R1B  | 5.806  | 3.122  | miR-2355-5p | -1.947 | PPP1R1B | HM-vs-LM |
| ANO1     | 0.941  | -0.433 | miR-3922-3p | -1.349 | ANO1    | HM-vs-LM |
| BHLHE411 | 1.318  | 0.264  | miR-3922-3p | -1.349 | BHLHE41 | HM-vs-LM |
| FAM83E   | 0.873  | -0.473 | miR-3922-3p | -1.349 | FAM83E  | HM-vs-LM |
| MST1R    | 0.934  | -0.486 | miR-3922-3p | -1.349 | MST1R   | HM-vs-LM |
| ZBTB7C1  | -1.695 | -3.278 | miR-3922-3p | -1.349 | ZBTB7C  | HM-vs-LM |
| ABCC3    | 1.240  | -0.131 | miR-10b-5p  | -1.887 | ABCC3   | HM-vs-MM |
| CCDC146  | -0.390 | -1.467 | miR-10b-5p  | -1.887 | CCDC146 | HM-vs-MM |
| PARP15   | 0.181  | -1.115 | miR-224-5p  | -1.547 | PARP15  | HM-vs-MM |
| ANTXR2   | -0.696 | -1.702 | miR-130a-5p | -1.161 | ANTXR2  | HM-vs-MM |
| FRMD5    | 0.818  | -0.304 | miR-130a-5p | -1.161 | FRMD5   | HM-vs-MM |

|          |        |        |             |        |          |          |
|----------|--------|--------|-------------|--------|----------|----------|
| MAP3K13  | 1.004  | -0.192 | miR-130a-5p | -1.161 | MAP3K13  | HM-vs-MM |
| MET2     | 1.712  | 0.257  | miR-130a-5p | -1.161 | MET      | HM-vs-MM |
| PNMA22   | 1.062  | -0.370 | miR-130a-5p | -1.161 | PNMA2    | HM-vs-MM |
| PPARG    | 0.893  | -0.206 | miR-130a-5p | -1.161 | PPARG    | HM-vs-MM |
| EGFR2    | -0.310 | -1.361 | miR-134-5p  | -1.105 | EGFR     | HM-vs-MM |
| NPNT     | 0.369  | -0.839 | miR-154-3p  | -1.353 | NPNT     | HM-vs-MM |
| RARRES3  | 1.084  | -0.253 | miR-154-3p  | -1.353 | RARRES3  | HM-vs-MM |
| ATP8A1   | -1.434 | -2.931 | miR-200a-3p | -1.087 | ATP8A1   | HM-vs-MM |
| CCND2    | 0.093  | -1.421 | miR-200a-3p | -1.087 | CCND2    | HM-vs-MM |
| EGFR1    | -0.310 | -1.361 | miR-200a-3p | -1.087 | EGFR     | HM-vs-MM |
| ANTXR21  | -0.696 | -1.702 | miR-369-3p  | -1.289 | ANTXR2   | HM-vs-MM |
| C15orf48 | 1.460  | 0.417  | miR-376a-3p | -1.715 | C15orf48 | HM-vs-MM |
| GIMAP2   | 0.992  | -0.158 | miR-376a-3p | -1.715 | GIMAP2   | HM-vs-MM |
| PARK2    | -3.133 | -4.585 | miR-379-5p  | -1.607 | PARK2    | HM-vs-MM |
| PNMA211  | 1.062  | -0.370 | miR-379-5p  | -1.607 | PNMA2    | HM-vs-MM |
| CCDC1461 | -0.390 | -1.467 | miR-340-5p  | -1.097 | CCDC146  | HM-vs-MM |
| KCNK11   | 0.762  | -0.281 | miR-340-5p  | -1.097 | KCNK1    | HM-vs-MM |
| NPNT1    | 0.369  | -0.839 | miR-340-5p  | -1.097 | NPNT     | HM-vs-MM |

|           |        |        |             |        |          |          |
|-----------|--------|--------|-------------|--------|----------|----------|
| IRF8      | 1.431  | 0.173  | miR-452-5p  | -1.638 | IRF8     | HM-vs-MM |
| TNFSF13B  | 0.336  | -0.687 | miR-452-5p  | -1.638 | TNFSF13B | HM-vs-MM |
| CELSR3    | 3.617  | 2.098  | miR-500a-3p | -1.108 | CELSR3   | HM-vs-MM |
| CACNA1D   | 1.037  | 2.557  | miR-625-5p  | 1.369  | CACNA1D  | HM-vs-MM |
| CACNA2D21 | -4.575 | -2.719 | miR-625-5p  | 1.369  | CACNA2D2 | HM-vs-MM |
| CADM11    | -2.388 | -0.834 | miR-625-5p  | 1.369  | CADM1    | HM-vs-MM |
| CNIH2     | -1.584 | -0.194 | miR-625-5p  | 1.369  | CNIH2    | HM-vs-MM |
| COL8A2    | -2.998 | -1.891 | miR-625-5p  | 1.369  | COL8A2   | HM-vs-MM |
| DLGAP3    | -1.059 | 1.004  | miR-625-5p  | 1.369  | DLGAP3   | HM-vs-MM |
| DNALI1    | -2.905 | -1.140 | miR-625-5p  | 1.369  | DNALI1   | HM-vs-MM |
| DNMT3B    | 1.326  | 2.555  | miR-625-5p  | 1.369  | DNMT3B   | HM-vs-MM |
| IGF2BP1   | 2.026  | 5.910  | miR-625-5p  | 1.369  | IGF2BP1  | HM-vs-MM |
| KCNC3     | -0.065 | 1.446  | miR-625-5p  | 1.369  | KCNC3    | HM-vs-MM |
| MPZ       | -3.891 | -2.845 | miR-625-5p  | 1.369  | MPZ      | HM-vs-MM |
| MYEF2     | -4.850 | -1.758 | miR-625-5p  | 1.369  | MYEF2    | HM-vs-MM |
| MYH10     | -1.943 | -0.631 | miR-625-5p  | 1.369  | MYH10    | HM-vs-MM |
| PAIP2B    | -5.422 | -3.006 | miR-625-5p  | 1.369  | PAIP2B   | HM-vs-MM |
| PCDH191   | -4.037 | -2.124 | miR-625-5p  | 1.369  | PCDH19   | HM-vs-MM |

|         |        |        |            |       |         |          |
|---------|--------|--------|------------|-------|---------|----------|
| PCDHGA4 | -2.549 | -1.030 | miR-625-5p | 1.369 | PCDHGA4 | HM-vs-MM |
| PCDHGA5 | -2.621 | -1.505 | miR-625-5p | 1.369 | PCDHGA5 | HM-vs-MM |
| PCDHGA7 | -2.205 | -1.088 | miR-625-5p | 1.369 | PCDHGA7 | HM-vs-MM |
| PCDHGA8 | -0.310 | 0.802  | miR-625-5p | 1.369 | PCDHGA8 | HM-vs-MM |
| PCDHGB1 | -1.378 | 1.334  | miR-625-5p | 1.369 | PCDHGB1 | HM-vs-MM |
| PCDHGB4 | -2.395 | -0.903 | miR-625-5p | 1.369 | PCDHGB4 | HM-vs-MM |
| PCDHGC3 | -2.013 | -0.584 | miR-625-5p | 1.369 | PCDHGC3 | HM-vs-MM |
| PLXNB3  | -2.063 | -0.078 | miR-625-5p | 1.369 | PLXNB3  | HM-vs-MM |
| PPP2R2C | -5.105 | -0.969 | miR-625-5p | 1.369 | PPP2R2C | HM-vs-MM |
| PTPRS   | -3.441 | -2.085 | miR-625-5p | 1.369 | PTPRS   | HM-vs-MM |
| RUNX3   | 0.009  | 1.601  | miR-625-5p | 1.369 | RUNX3   | HM-vs-MM |
| S100A1  | -2.735 | -1.446 | miR-625-5p | 1.369 | S100A1  | HM-vs-MM |
| SHROOM2 | -2.231 | 0.327  | miR-625-5p | 1.369 | SHROOM2 | HM-vs-MM |
| SYNGR3  | -1.394 | -0.071 | miR-625-5p | 1.369 | SYNGR3  | HM-vs-MM |
| TCEA2   | -2.290 | -0.925 | miR-625-5p | 1.369 | TCEA2   | HM-vs-MM |
| XKR6    | -1.632 | 0.429  | miR-625-5p | 1.369 | XKR6    | HM-vs-MM |
| ZNF605  | -1.629 | -0.027 | miR-625-5p | 1.369 | ZNF605  | HM-vs-MM |
| ZNF704  | -2.158 | -0.922 | miR-625-5p | 1.369 | ZNF704  | HM-vs-MM |

|          |        |        |             |        |          |          |
|----------|--------|--------|-------------|--------|----------|----------|
| GPA33    | 5.995  | 3.433  | miR-411-5p  | -1.269 | GPA33    | HM-vs-MM |
| CCDC1462 | -0.390 | -1.467 | miR-654-5p  | -1.426 | CCDC146  | HM-vs-MM |
| PKP2     | 1.412  | 0.365  | miR-654-5p  | -1.426 | PKP2     | HM-vs-MM |
| PPP1R1B2 | 5.806  | 3.491  | miR-654-5p  | -1.426 | PPP1R1B  | HM-vs-MM |
| TMEM229B | 1.113  | -0.366 | miR-654-5p  | -1.426 | TMEM229B | HM-vs-MM |
| UBXN10   | 0.336  | -1.072 | miR-654-5p  | -1.426 | UBXN10   | HM-vs-MM |
| GSDMB    | 2.312  | 0.655  | miR-542-3p  | -1.091 | GSDMB    | HM-vs-MM |
| PARP151  | 0.181  | -1.115 | miR-542-3p  | -1.091 | PARP15   | HM-vs-MM |
| MAP3K131 | 1.004  | -0.192 | miR-1254    | -1.360 | MAP3K13  | HM-vs-MM |
| PPP1R1B1 | 5.806  | 3.491  | miR-2355-5p | -1.727 | PPP1R1B  | HM-vs-MM |
| FAM81A   | 2.743  | 1.543  | miR-2355-3p | -1.476 | FAM81A   | HM-vs-MM |
| SLC16A2  | 0.065  | -1.164 | miR-3679-5p | -1.388 | SLC16A2  | HM-vs-MM |
| BHLHE412 | 1.318  | 0.163  | miR-3922-3p | -1.276 | BHLHE41  | HM-vs-MM |
| TMEM139  | 1.702  | -0.021 | miR-3922-3p | -1.276 | TMEM139  | HM-vs-MM |
