# Supplementary material
Source: HighWire-hosted journal article supplement (https://gut.bmj.com/content/68/3/389)
Supplement: inline-supplementary-material-25 [file inline-supplementary-material-25.pdf]

**Supplemental Table 15. Immunostaining analysis of PTPN13 and pHER2 (Tyr1248) in EAC tumor microarrays\*.**

|                            | strong PTPN13 staining(>60) | weak PTPN13 staining (<=60) |
|----------------------------|-----------------------------|-----------------------------|
| strong pHER2 staining (2+) | 0                           | 3                           |
| weak pHER2 staining (<=2)  | 16                          | 20                          |

\*The detailed staining methods, antibodies and the scoring of PTPN13 and pHER2 (Y1248) immunostaining are described in **Supplemental Methods**.
