# Supplementary material
Source: HighWire-hosted journal article supplement (https://gut.bmj.com/content/68/3/389)
Supplement: inline-supplementary-material-26 [file inline-supplementary-material-26.pdf]

**Supplemental Table 16: Methylation subtype status of EAC cell lines.**

| EAC cell lines | Source                                                                               | Methylation Subtype |
|----------------|--------------------------------------------------------------------------------------|---------------------|
| Eso-Ad1        | A kind gift from Dr. Hector Alvarez*                                                 | HM                  |
| ESO26          | the European Collection of Authenticated Cell Cultures (ECACC) through Sigma Aldrich | HM                  |
| ESO51          | the European Collection of Authenticated Cell Cultures (ECACC) through Sigma Aldrich | HM                  |
| OE33           | the European Collection of Authenticated Cell Cultures (ECACC) through Sigma Aldrich | HM                  |
| FLO-1          | the European Collection of Authenticated Cell Cultures (ECACC) through Sigma Aldrich | IM                  |
| OACM5-1        | the European Collection of Authenticated Cell Cultures (ECACC) through Sigma Aldrich | LM                  |
| SK-GT-4        | the European Collection of Authenticated Cell Cultures (ECACC) through Sigma Aldrich | LM                  |
| OACP4C         | the European Collection of Authenticated Cell Cultures (ECACC) through Sigma Aldrich | MM                  |
| OE19           | the European Collection of Authenticated Cell Cultures (ECACC) through Sigma Aldrich | MM                  |

\* Alvarez H, Koorstra JB, Hong SM, et al. Establishment and characterization of a bona fide Barrett esophagus-associated adenocarcinoma cell line. *Cancer Biol Ther* 2008;7(11):1753-5.
