# Supplementary material
Source: HighWire-hosted journal article supplement (https://gut.bmj.com/content/68/3/389)
Supplement: inline-supplementary-material-29 [file inline-supplementary-material-29.pdf]

**Supplemental Table 4: Gene sequence panel and filtered results for BETRNet EACs and NDBEs.**

A sequencing gene panel (n=243)

|          |          |         |         |         |        |          |
|----------|----------|---------|---------|---------|--------|----------|
| AKT1     | BLM      | CDKN2A  | ERBB4   | HLA-A   | MAP2K1 | NKX2-1   |
| AKT2     | BRAF     | CDKN2B  | ETV4    | HLA-B   | MAP2K2 | NOTCH1   |
| AKT3     | BRCA1    | CDKN2C  | EYA4    | ID1     | MAP2K2 | NOTCH2   |
| ALK      | BRCA2    | CHL1    | FAM190A | IDH1    | MAP2K4 | NOTCH3   |
| ALPK2    | BRD4     | CHRD    | FAT1    | IDH2    | MAP3K1 | NOTCH4   |
| APC      | CA9      | CIC     | FAT2    | IGF1R   | MAP3K5 | NR2F2    |
| AR       | CACNA2D3 | CLDN18  | FAT3    | IGF2    | MAP3K7 | NRAS     |
| ARAF     | CASP3    | CRIP1   | FAT4    | IGF2BP3 | MAP3K8 | PAK1     |
| ARHGAP26 | CASZ1    | CRKL    | FBXW7   | IGF2R   | MAP3K9 | PALB2    |
| ARHGAP6  | CCND1    | CSMD1   | FGF19   | IL8     | MAPK1  | PARD3B   |
| ARID1A   | CCND2    | CTNNA1  | FGF3    | ING5    | MAPK3  | PARK2    |
| ARID1B   | CCND3    | CTNNA3  | FGF4    | IRF2    | MCL1   | PAX9     |
| ARID2    | CCNE1    | CTNNB1  | FGFR1   | JAK2    | MDM2   | PBRM1    |
| ATM      | CD274    | CTSB    | FGFR2   | KDM6A   | MECOM  | PCGF6    |
| AXL      | CD44     | CXCL10  | FGFR3   | KEAP1   | MET    | PDCD1LG2 |
| B2M      | CDH1     | DOCK2   | FGFR4   | KIF13A  | MLL3   | PDE4D    |
| BAK1     | CDK1     | E2F1    | FHIT    | KIT     | MSH2   | PDGFRA   |
| BCL2     | CDK12    | E2F3    | FRS2    | KLF12   | MSH6   | PDGFRB   |
| BCL2A1   | CDK2     | EGFR    | GAB1    | KLF5    | MTOR   | PGM5     |
| BCL2L1   | CDK4     | ELF3    | GAB2    | KMT2D   | MUTYH  | PHLDA1   |
| BCL2L12  | CDK5     | ELMO1   | GATA4   | KRAS    | MYB    | PIK3CA   |
| BCL2L2   | CDK6     | EP300   | GATA6   | LARP4B  | MYC    | PIK3CG   |
| BCL6     | CDK8     | EPHB3   | GLI3    | LRP1B   | MYD88  | PIK3R1   |
| BCL9     | CDK9     | EPHB6   | GLIPR1  | LRP6    | NEGR1  | PLK2     |
| BCOR     | CDKN1A   | ERBB2   | GNAS    | MACF1   | NEIL2  | POLB     |
| BCORL1   | CDKN1B   | ERBB2IP | HES1    | MACROD2 | NF1    | POU5F1B  |
| BIRC5    | CDKN1C   | ERBB3   | HGF     | MAGI3   | NFE2L2 | PREX2    |

BETRNet EAC filtered alterations by sample.

| <b>Meth Group</b> | <b><u>DX</u></b> | <b><u>SubjectID</u></b> | <b><u>analysis</u></b> | <b><u>chromosome</u></b> | <b><u>position</u></b> | <b><u>reference allele</u></b> |
|-------------------|------------------|-------------------------|------------------------|--------------------------|------------------------|--------------------------------|
| HM                | EAC              | 9                       | MuTect                 | 17                       | 37868208               | C                              |
| HM                | EAC              | 9                       | GATK                   | 17                       | 7579540                | AT                             |

|    |     |    |        |    |           |             |
|----|-----|----|--------|----|-----------|-------------|
| HM | EAC | 11 | MuTect | 9  | 21971028  | C           |
| HM | EAC | 11 | MuTect | 17 | 37868208  | C           |
| HM | EAC | 11 | MuTect | 4  | 187532905 | G           |
| HM | EAC | 11 | MuTect | 6  | 152464784 | C           |
| HM | EAC | 11 | MuTect | 17 | 7578176   | C           |
| HM | EAC | 13 | GATK   | 2  | 141108388 | C           |
| HM | EAC | 13 | MuTect | 2  | 141816482 | G           |
| HM | EAC | 13 | MuTect | 18 | 48591918  | C           |
| HM | EAC | 13 | GATK   | 17 | 7577137   | C           |
| HM | EAC | 38 | MuTect | 17 | 7577121   | G           |
| HM | EAC | 37 | GATK   | 1  | 27106385  | T           |
| HM | EAC | 37 | GATK   | 1  | 27106388  | A           |
| HM | EAC | 37 | MuTect | 17 | 37868208  | C           |
| HM | EAC | 37 | GATK   | 16 | 79245873  | G           |
| HM | EAC | 42 | MuTect | 5  | 39002707  | G           |
| HM | EAC | 42 | GATK   | 17 | 7573998   | CTCTCGGAACA |
| IM | EAC | 3  | MuTect | 5  | 142283145 | C           |
| IM | EAC | 3  | GATK   | 1  | 27092824  | TC          |
| IM | EAC | 3  | MuTect | 6  | 29911240  | T           |
| IM | EAC | 3  | MuTect | 7  | 151921114 | A           |
| IM | EAC | 3  | MuTect | 17 | 29508451  | A           |
| IM | EAC | 3  | MuTect | 17 | 7577559   | G           |
| IM | EAC | 3  | GATK   | 16 | 79245873  | G           |
| IM | EAC | 8  | MuTect | 2  | 212495321 | T           |
| IM | EAC | 8  | MuTect | 17 | 7578406   | C           |
| IM | EAC | 24 | GATK   | 2  | 141092106 | CA          |
| IM | EAC | 24 | GATK   | 12 | 49426021  | TGG         |
| IM | EAC | 24 | MuTect | 2  | 178096196 | C           |
| IM | EAC | 24 | GATK   | 10 | 114710517 | TGCC        |
| IM | EAC | 24 | MuTect | 17 | 7578406   | C           |
| IM | EAC | 23 | MuTect | 17 | 37868208  | C           |
| IM | EAC | 23 | MuTect | 18 | 48591919  | G           |
| IM | EAC | 22 | MuTect | 17 | 7577559   | G           |

|    |     |     |        |    |           |                     |
|----|-----|-----|--------|----|-----------|---------------------|
| LM | EAC | 14  | MuTect | 1  | 27100207  | C                   |
| LM | EAC | 14  | MuTect | 9  | 21971120  | G                   |
| LM | EAC | 14  | MuTect | 6  | 29911240  | T                   |
| LM | EAC | 14  | MuTect | 18 | 48591918  | C                   |
| LM | EAC | 14  | MuTect | 17 | 7577548   | C                   |
| LM | EAC | 14  | MuTect | 17 | 7578406   | C                   |
| LM | EAC | 15  | MuTect | 6  | 29911240  | T                   |
| LM | EAC | 15  | MuTect | 1  | 120612013 | G                   |
| LM | EAC | 15  | GATK   | 19 | 15281354  | CA                  |
| LM | EAC | 15  | MuTect | 17 | 7578263   | G                   |
| LM | EAC | 5   | GATK   | 6  | 157469855 | TGGACAAG            |
| LM | EAC | 5   | MuTect | 17 | 7577115   | A                   |
| LM | EAC | 21  | MuTect | 20 | 57484420  | C                   |
| LM | EAC | 21  | MuTect | 3  | 178952065 | G                   |
| LM | EAC | 21  | GATK   | 12 | 57490754  | GCAGGCCCTGC         |
| LM | EAC | 21  | MuTect | 17 | 7578475   | G                   |
| LM | EAC | 31  | MuTect | 1  | 27106536  | G                   |
| LM | EAC | 31  | MuTect | 17 | 7578212   | G                   |
| LM | EAC | 34  | GATK   | 9  | 21974714  | GGCAGCGCCCCCGCCTCCA |
| LM | EAC | 34  | GATK   | 7  | 81355331  | TCCCTATTG           |
| LM | EAC | 34  | MuTect | 2  | 141128746 | A                   |
| LM | EAC | 34  | MuTect | 17 | 7577538   | C                   |
| MM | EAC | 1   | MuTect | 17 | 7577106   | G                   |
| MM | EAC | 106 | GATK   | 6  | 29911318  | CG                  |
| MM | EAC | 106 | MuTect | 4  | 26426291  | C                   |
| MM | EAC | 106 | MuTect | 17 | 7577548   | C                   |
| MM | EAC | 41  | MuTect | 4  | 153247175 | T                   |
| MM | EAC | 41  | GATK   | 13 | 49039201  | TCATGCAGAGA         |

C

BETRNet NDBE filtered alterations by sample.

| <u>Meth Group</u> | <u>DX</u> | <u>Subject</u> | <u>analysis</u> | <u>chromosome</u> | <u>position</u> | <u>reference allele</u> |
|-------------------|-----------|----------------|-----------------|-------------------|-----------------|-------------------------|
| HM                | BE        | 53             | GATK            | 9                 | 21994170        | CGCTG                   |
| HM                | BE        | 53             | GATK            | 7                 | 151882659       | TC                      |

|    |    |    |        |    |           |                     |
|----|----|----|--------|----|-----------|---------------------|
| HM | BE | 53 | MuTect | 7  | 151932961 | G                   |
| HM | BE | 64 | MuTect | 6  | 29911240  | T                   |
| HM | BE | 64 | MuTect | 17 | 29556136  | C                   |
| IM | BE | 55 | GATK   | 6  | 157502295 | AT                  |
| IM | BE | 55 | GATK   | 9  | 21971123  | TGA                 |
| LM | BE | 29 | GATK   | 1  | 27106687  | CA                  |
| LM | BE | 29 | GATK   | 9  | 21974726  | GCCTCCAGCAGCGCCCGCA |
| LM | BE | 29 | GATK   | 6  | 29911318  | CG                  |
| LM | BE | 29 | MuTect | 17 | 7578389   | G                   |
| LM | BE | 58 | GATK   | 1  | 27105855  | AT                  |
| LM | BE | 58 | GATK   | 12 | 25368468  | CA                  |
| LM | BE | 58 | MuTect | 6  | 152831401 | G                   |

|         |        |
|---------|--------|
| PRKCi   | TERT   |
| PTCH1   | TGFBR2 |
| PTCH2   | TLN1   |
| PTEN    | TLR4   |
| PTPN23  | TP53   |
| PTPRD   | TP63   |
| RASA1   | TP73   |
| RASSF7  | TRAF2  |
| RB1     | TSC1   |
| RBPJ    | TSC2   |
| RhoA    | USP9X  |
| RICTOR  | VEGFA  |
| RNF43   | VPS13A |
| RPTOR   | WT1    |
| RUNX1   | WWOX   |
| RUNX1T1 | YAP1   |
| RUNX3   | ZNF217 |
| SFRP4   | ZNF750 |
| SMAD2   | SOX9   |
| SMAD3   | SRC    |
| SMAD4   | STAT3  |
| SMARCA4 | STAT6  |
| SMARCA5 | STK11  |
| SMO     | SYNE1  |
| SMURF1  | TCF7L1 |
| SOHLH2  | TCF7L2 |
| SOX2    | TERC   |

| <u>alternate allele</u> | <u>BestEffect Variant</u> | <u>BestEffect Hugo Symbol</u> | <u>BestEffect Annotation Transcript</u> | <u>BestEffect Refseq mRNA Id</u> |
|-------------------------|---------------------------|-------------------------------|-----------------------------------------|----------------------------------|
| T                       | Missense_Mutation         | ERBB2                         | uc002hso.2                              | NM_004448                        |
| A                       | Frame_Shift_Del           | TP53                          | uc002gim.2                              | NM_001126112                     |

|                  |                   |          |            |              |
|------------------|-------------------|----------|------------|--------------|
| T                | Nonsense_Mutation | CDKN2A   | uc003zpk.2 | NM_000077    |
| T                | Missense_Mutation | ERBB2    | uc002hso.2 | NM_004448    |
| T                | Nonsense_Mutation | FAT1     | uc003izf.2 | NM_005245    |
| A                | Nonsense_Mutation | SYNE1    | uc010kiw.2 | NM_182961    |
| T                | Missense_Mutation | TP53     | uc010vug.1 | NM_001126114 |
| CT               | Frame_Shift_Ins   | LRP1B    | uc002tvj.1 | NM_018557    |
| A                | Nonsense_Mutation | LRP1B    | uc002tvj.1 | NM_018557    |
| T                | Missense_Mutation | SMAD4    | uc010xdp.1 | NM_005359    |
| CCGTCCCAGTAGATTA | In_Frame_Ins      | TP53     | uc002gim.2 | NM_001126112 |
| A                | Missense_Mutation | TP53     | uc002gim.2 | NM_001126112 |
| TTG              | Frame_Shift_Ins   | ARID1A   | uc001bmv.1 | NM_006015    |
| AT               | Frame_Shift_Ins   | ARID1A   | uc001bmv.1 | NM_006015    |
| T                | Missense_Mutation | ERBB2    | uc002hso.2 | NM_004448    |
| GGTAAA           | Frame_Shift_Ins   | WWOX     | uc010che.2 |              |
| A                | Nonsense_Mutation | RICTOR   | uc003jlo.2 | NM_152756    |
| C                | Frame_Shift_Del   | TP53     | uc002gim.2 | NM_001126112 |
| G                | Nonsense_Mutation | ARHGAP26 | uc011dbj.1 | NM_015071    |
| T                | Frame_Shift_Del   | ARID1A   | uc001bmv.1 | NM_006015    |
| A                | Nonsense_Mutation | HLA-A    | uc003noo.2 |              |
| T                | Nonsense_Mutation | MLL3     | uc003wla.2 | NM_170606    |
| T                | Nonsense_Mutation | NF1      | uc002hgg.2 | NM_001042492 |
| A                | Missense_Mutation | TP53     | uc002gim.2 | NM_001126112 |
| GGTAAA           | Frame_Shift_Ins   | WWOX     | uc010che.2 |              |
| C                | Splice_Site       | ERBB4    | uc002veg.1 | NM_005235    |
| T                | Missense_Mutation | TP53     | uc002gim.2 | NM_001126112 |
| C                | Frame_Shift_Del   | LRP1B    | uc002tvj.1 | NM_018557    |
| T                | Frame_Shift_Del   | MLL2     | uc001rta.3 | NM_003482    |
| A                | Nonsense_Mutation | NFE2L2   | uc002ulh.3 | NM_006164    |
| T                | In_Frame_Del      | TCF7L2   | uc001lae.3 | NM_001146274 |
| T                | Missense_Mutation | TP53     | uc002gim.2 | NM_001126112 |
| T                | Missense_Mutation | ERBB2    | uc002hso.2 | NM_004448    |
| A                | Missense_Mutation | SMAD4    | uc010xdp.1 | NM_005359    |
| A                | Missense_Mutation | TP53     | uc002gim.2 | NM_001126112 |

|   |                   |        |            |              |
|---|-------------------|--------|------------|--------------|
| T | Nonsense_Mutation | ARID1A | uc001bmv.1 | NM_006015    |
| A | Nonsense_Mutation | CDKN2A | uc003zpk.2 | NM_000077    |
| A | Nonsense_Mutation | HLA-A  | uc003noo.2 |              |
| T | Missense_Mutation | SMAD4  | uc010xdp.1 | NM_005359    |
| T | Missense_Mutation | TP53   | uc002gim.2 | NM_001126112 |
| T | Missense_Mutation | TP53   | uc002gim.2 | NM_001126112 |
| A | Nonsense_Mutation | HLA-A  | uc003noo.2 |              |
| A | Missense_Mutation | NOTCH2 | uc001eik.2 | NM_024408    |
| C | Frame_Shift_Del   | NOTCH3 | uc002nan.2 | NM_000435    |
| A | Nonsense_Mutation | TP53   | uc002gim.2 | NM_001126112 |
| T | Frame_Shift_Del   | ARID1B | uc003qqn.2 | NM_017519    |
| C | Missense_Mutation | TP53   | uc002gim.2 | NM_001126112 |
| T | Missense_Mutation | GNAS   | uc002xzw.2 | NM_080425    |
| A | Missense_Mutation | PIK3CA | uc003fjk.2 | NM_006218    |
| G | Splice_Site       | STAT6  | uc009zpg.2 | NM_003153    |
| A | Missense_Mutation | TP53   | uc002gim.2 | NM_001126112 |
| A | Nonsense_Mutation | ARID1A | uc001bmv.1 | NM_006015    |
| A | Nonsense_Mutation | TP53   | uc002gim.2 | NM_001126112 |
| G | In_Frame_Del      | CDKN2A | uc003zpk.2 | NM_000077    |
| T | Splice_Site       | HGF    | uc003uhl.2 | NM_000601    |
| G | Splice_Site       | LRP1B  | uc002tvj.1 | NM_018557    |
| T | Missense_Mutation | TP53   | uc002gim.2 | NM_001126112 |
| C | Missense_Mutation | TP53   | uc002gim.2 | NM_001126112 |
| C | Frame_Shift_Del   | HLA-A  | uc003noo.2 |              |
| T | Nonsense_Mutation | RBPJ   | uc003grx.1 | NM_005349    |
| T | Missense_Mutation | TP53   | uc002gim.2 | NM_001126112 |
| A | Nonsense_Mutation | FBXW7  | uc003ims.2 | NM_033632    |
| T | Frame_Shift_Del   | RB1    | uc001vcb.2 | NM_000321    |

| <u>alternate allele</u> | <u>BestEffect Variant</u> | <u>BestEffect Hugo S</u> | <u>BestEffect Annotation T</u> | <u>BestEffect Refseq</u> |
|-------------------------|---------------------------|--------------------------|--------------------------------|--------------------------|
| C                       | Frame_Shift_Del           | CDKN2A                   | uc003zpl.2                     | NM_058195                |
| T                       | Frame_Shift_Del           | MLL3                     | uc003wla.2                     | NM_170606                |

|   |                   |        |            |              |
|---|-------------------|--------|------------|--------------|
| A | Nonsense_Mutation | MLL3   | uc003wla.2 | NM_170606    |
| A | Nonsense_Mutation | HLA-A  | uc003noo.2 |              |
| T | Nonsense_Mutation | NF1    | uc002hgg.2 | NM_001042492 |
| A | Frame_Shift_Del   | ARID1B | uc003qqn.2 | NM_017519    |
| T | Frame_Shift_Del   | CDKN2A | uc003zpl.2 | NM_058195    |
| C | Frame_Shift_Del   | ARID1A | uc001bmv.1 | NM_006015    |
| G | In_Frame_Del      | CDKN2A | uc003zpk.2 | NM_000077    |
| C | Frame_Shift_Del   | HLA-A  | uc003noo.2 |              |
| A | Missense_Mutation | TP53   | uc002gim.2 | NM_001126112 |
| A | Frame_Shift_Del   | ARID1A | uc001bmv.1 | NM_006015    |
| C | Frame_Shift_Del   | KRAS   | uc001rgp.1 | NM_033360    |
| A | Missense_Mutation | SYNE1  | uc010kiw.2 | NM_182961    |



| <u>BestEffect Protein Change</u> | <u>BestEffect cDNA Change</u> | <u>dbSNP site</u> | <u>tumor fraction</u> |
|----------------------------------|-------------------------------|-------------------|-----------------------|
| p.S310F                          | c.929C>T                      | COSMIC            | 0.368421              |
| p.D49fs                          | c.146_147AT>T                 |                   | 0.7037                |

|                   |                             |        |          |
|-------------------|-----------------------------|--------|----------|
| p.W110*           | c.330G>A                    | COSMIC | 0.698925 |
| p.S310F           | c.929C>T                    | COSMIC | 0.075188 |
| p.S3163*          | c.9488C>A                   | NOVEL  | 0.171429 |
| p.E8365*          | c.25093G>T                  | NOVEL  | 0.235955 |
| p.V186I           | c.556G>A                    | COSMIC | 0.3125   |
| p.R3957fs         | c.11870_11870G>AG           |        | 0.4875   |
| p.R460*           | c.1378C>T                   | NOVEL  | 0.528302 |
| p.R361C           | c.1081C>T                   | COSMIC | 0.530435 |
| p.267_267R>RNLLGR | c.801_801G>TAATCTACTGGGACGG |        | 0.1678   |
| p.R273C           | c.817C>T                    | COSMIC | 0.692308 |
| p.F1999fs         | c.5996_5996T>TTG            |        | 0.2254   |
| p.E2000fs         | c.5999_5999A>AT             |        | 0.2347   |
| p.S310F           | c.929C>T                    | COSMIC | 0.921842 |
| p.G260fs          | c.778_778G>GGTAAA           |        | 0.2556   |
| p.R108*           | c.322C>T                    | NOVEL  | 0.43     |
| p.M340fs          | c.1019_1029TGTTCCGAGAG>G    |        | 0.6526   |
| p.S248*           | c.743C>G                    | NOVEL  | 0.106838 |
| p.S949fs          | c.2845_2846TC>T             |        | 0.2541   |
| p.L180*           | c.539T>A                    | COSMIC | 0.428571 |
| p.C1103*          | c.3309T>A                   | COSMIC | 0.062147 |
| p.K200*           | c.598A>T                    | NOVEL  | 0.244444 |
| p.S241F           | c.722C>T                    | COSMIC | 0.393939 |
| p.G260fs          | c.778_778G>GGTAAA           |        | 0.314    |
| p.R649_splice     | c.1947_splice               | NOVEL  | 0.223684 |
| p.R175H           | c.524G>A                    | COSMIC | 0.351351 |
| p.V4046fs         | c.12138_12139TG>G           |        | 0.3596   |
| p.P4155fs         | c.12465_12467CCA>A          |        | 0.05     |
| p.E379*           | c.1135G>T                   | NOVEL  | 0.121212 |
| p.P2del           | c.2_5TGCC>T                 |        | 0.3377   |
| p.R175H           | c.524G>A                    | COSMIC | 0.425339 |
| p.S310F           | c.929C>T                    | COSMIC | 0.737226 |
| p.R361H           | c.1082G>A                   | COSMIC | 0.6875   |
| p.S241F           | c.722C>T                    | COSMIC | 0.604167 |

|                |                               |        |          |
|----------------|-------------------------------|--------|----------|
| p.R1335*       | c.4003C>T                     | COSMIC | 0.448276 |
| p.R80*         | c.238C>T                      | COSMIC | 0.66055  |
| p.L180*        | c.539T>A                      | COSMIC | 1        |
| p.R361C        | c.1081C>T                     | COSMIC | 0.296296 |
| p.G245S        | c.733G>A                      | COSMIC | 0.149254 |
| p.R175H        | c.524G>A                      | COSMIC | 0.436548 |
| p.L180*        | c.539T>A                      | COSMIC | 0.138889 |
| p.A3V          | c.8C>T                        | COSMIC | 0.085106 |
| p.L1634fs      | c.4901_4902TG>G               |        | 0.0776   |
| p.R196*        | c.586C>T                      | COSMIC | 0.210256 |
| p.H812fs       | c.2436_2443TGGACAAG>T         |        | 0.1985   |
| p.C275G        | c.823T>G                      | COSMIC | 0.663934 |
| p.R844C        | c.2530C>T                     | COSMIC | 0.29703  |
| p.M1040I       | c.3120G>A                     | COSMIC | 0.24772  |
| p.Q791_splice  | c.2373_splice                 |        | 0.1293   |
| p.P152L        | c.455C>T                      | COSMIC | 0.555944 |
| p.W2049*       | c.6147G>A                     | NOVEL  | 0.368071 |
| p.R213*        | c.637C>T                      | COSMIC | 0.301471 |
| p.LEAGAL32del  | c.95_113TGGAGGCGGGGGCGCTGCC>C |        | 0.5758   |
| p.K347_splice  | c.1041_splice                 |        | 0.2222   |
| p.E3625_splice | c.10875_splice                | NOVEL  | 0.418182 |
| p.R248Q        | c.743G>A                      | COSMIC | 0.532258 |
| p.P278A        | c.832C>G                      | COSMIC | 0.822034 |
| p.T206fs       | c.617_618CG>C                 |        | 0.1616   |
| p.R238*        | c.712C>T                      | DBSNP  | 0.107438 |
| p.G245S        | c.733G>A                      | COSMIC | 0.411348 |
| p.R543*        | c.1627A>T                     | COSMIC | 0.276596 |
| p.F760fs       | c.2279_2289TCATGCAGAGA>T      |        | 0.0531   |

| <b><u>BestEffect Protein Change</u></b> | <b><u>BestEffect cDNA Change</u></b> | <b><u>tumor fraction</u></b> |
|-----------------------------------------|--------------------------------------|------------------------------|
| p.Q94fs                                 | c.280_284CAGCG>G                     | 0.5263                       |
| p.E1689fs                               | c.5065_5066GA>A                      | 0.0588                       |

|               |                               |          |
|---------------|-------------------------------|----------|
| p.R904*       | c.2710C>T                     | 0.044665 |
| p.L180*       | c.539T>A                      | 1        |
| p.Q835*       | c.2503C>T                     | 0.082192 |
| p.I1092fs     | c.3274_3275AT>A               | 0.3247   |
| p.S133fs      | c.399_401TCA>A                | 0.5758   |
| p.Q2100fs     | c.6298_6299CA>C               | 0.202    |
| p.VRALLE28del | c.83_101TGCGGGCGCTGCTGGAGGC>C | 0.2114   |
| p.T206fs      | c.617_618CG>C                 | 0.1      |
| p.R181C       | c.541C>T                      | 0.236111 |
| p.P1822fs     | c.5466_5467AT>A               | 0.3862   |
| p.L159fs      | c.476_477TG>G                 | 0.547    |
| p.R170W       | c.508C>T                      | 0.315    |
