# Supplementary material
Source: HighWire-hosted journal article supplement (https://gut.bmj.com/content/68/3/389)
Supplement: inline-supplementary-material-33 [file inline-supplementary-material-33.pdf]

**Supplemental Table 11: Pathway analysis results performed on DETGs repressed in HM compared to LM EACs (Binom. Test, p-unadj).**

|                         |                                                    | Reference (Homo sapiens) | Input Gene List |          |                       |                 |          |
|-------------------------|----------------------------------------------------|--------------------------|-----------------|----------|-----------------------|-----------------|----------|
| Annotation Data Set     | Term                                               | Gene_Count               | Gene_Count      | Expected | Over/Under-enrichment | Fold_Enrichment | P-unadj  |
| Slim Biological Process | asymmetric protein localization (GO:0008105)       | 12                       | 1               | 0.04     | +                     | 22.77           | 4.30E-02 |
|                         | sulfur compound metabolic process (GO:0006790)     | 78                       | 2               | 0.29     | +                     | 7.01            | 3.35E-02 |
|                         | amino acid transport (GO:0006865)                  | 79                       | 2               | 0.29     | +                     | 6.92            | 3.43E-02 |
|                         | protein phosphorylation (GO:0006468)               | 80                       | 2               | 0.29     | +                     | 6.83            | 3.50E-02 |
|                         | gamete generation (GO:0007276)                     | 161                      | 3               | 0.59     | +                     | 5.09            | 2.15E-02 |
|                         | synaptic transmission (GO:0007268)                 | 328                      | 5               | 1.2      | +                     | 4.17            | 7.19E-03 |
|                         | reproduction (GO:0000003)                          | 266                      | 4               | 0.97     | +                     | 4.11            | 1.67E-02 |
|                         | mesoderm development (GO:0007498)                  | 278                      | 4               | 1.02     | +                     | 3.93            | 1.92E-02 |
|                         | cell adhesion (GO:0007155)                         | 336                      | 4               | 1.23     | +                     | 3.25            | 3.51E-02 |
|                         | biological adhesion (GO:0022610)                   | 336                      | 4               | 1.23     | +                     | 3.25            | 3.51E-02 |
|                         | cell-cell signaling (GO:0007267)                   | 513                      | 6               | 1.88     | +                     | 3.2             | 1.14E-02 |
|                         | system process (GO:0003008)                        | 910                      | 7               | 3.33     | +                     | 2.1             | 4.90E-02 |
|                         | developmental process (GO:0032502)                 | 1569                     | 11              | 5.74     | +                     | 1.92            | 2.74E-02 |
|                         | single-multicellular organism process (GO:0044707) | 1463                     | 10              | 5.35     | +                     | 1.87            | 4.05E-02 |
|                         | multicellular organismal process (GO:0032501)      | 1479                     | 10              | 5.41     | +                     | 1.85            | 4.31E-02 |
|                         | response to stimulus (GO:0050896)                  | 2677                     | 4               | 9.8      | -                     | 0.41            | 2.57E-02 |
|                         |                                                    |                          |                 |          |                       |                 |          |
| Slim Molecular Function | kinase inhibitor activity (GO:0019210)             | 30                       | 2               | 0.11     | +                     | 18.22           | 5.54E-03 |
|                         | actin binding (GO:0003779)                         | 133                      | 3               | 0.49     | +                     | 6.16            | 1.31E-02 |
