# Supplementary material
Source: HighWire-hosted journal article supplement (https://gut.bmj.com/content/68/3/389)
Supplement: inline-supplementary-material-34 [file inline-supplementary-material-34.pdf]

**Supplemental Table 12: Pathway analysis results performed on DETGs repressed in LM compared to HM EACs (Binom. Test, p-adj).**

|                                    |                                                                      | Reference<br>(Homo sapiens) | Input Gene List |          |                       |                 |          |
|------------------------------------|----------------------------------------------------------------------|-----------------------------|-----------------|----------|-----------------------|-----------------|----------|
| Annotation Data Set                | Term                                                                 | Gene_Count                  | Gene_Count      | Expected | Over/Under-Enrichment | Fold_Enrichment | P-adj    |
| PANTHER GO-Slim Cellular Component | basal part of cell (GO:0045178)                                      | 10                          | 3               | 0.02     | +                     | > 100           | 7.00E-05 |
|                                    | plasma membrane (GO:0005886)                                         | 1317                        | 12              | 2.57     | +                     | 4.68            | 3.18E-04 |
|                                    | Unclassified (UNCLASSIFIED)                                          | 14246                       | 22              | 27.76    | -                     | 0.79            | 0.00E+00 |
| PANTHER GO-Slim Molecular Function | transmembrane receptor protein tyrosine kinase activity (GO:0004714) | 60                          | 3               | 0.12     | +                     | 25.66           | 4.03E-02 |
|                                    | Unclassified (UNCLASSIFIED)                                          | 12190                       | 20              | 23.75    | -                     | 0.84            | 0.00E+00 |
