# Supplementary material
Source: HighWire-hosted journal article supplement (https://gut.bmj.com/content/68/3/389)
Supplement: inline-supplementary-material-35 [file inline-supplementary-material-35.pdf]

**Supplemental Table 13: Pathway analysis results performed on DETGs repressed in HM compared to MM EACs (Binom. Test, p-adj).**

|                                    |                                     | Reference<br>(Homo sapiens) | Input Gene List |          |                       |                 |          |
|------------------------------------|-------------------------------------|-----------------------------|-----------------|----------|-----------------------|-----------------|----------|
| Annotation Data Set                | Term                                | Gene_Count                  | Gene_Count      | Expected | Over/Under-Enrichment | Fold_Enrichment | P-adj    |
| PANTHER GO-Slim Biological Process | cell adhesion (GO:0007155)          | 336                         | 8               | 0.5      | +                     | 16.16           | 5.60E-06 |
|                                    | biological adhesion (GO:0022610)    | 336                         | 8               | 0.5      | +                     | 16.16           | 5.60E-06 |
|                                    | cell-cell signaling (GO:0007267)    | 513                         | 7               | 0.76     | +                     | 9.26            | 1.87E-03 |
|                                    | Unclassified (UNCLASSIFIED)         | 10635                       | 9               | 15.67    | -                     | 0.57            | 0.00E+00 |
|                                    |                                     |                             |                 |          |                       |                 |          |
| PANTHER Pathways                   | Cadherin signaling pathway (P00012) | 148                         | 6               | 0.22     | +                     | 27.52           | 1.20E-05 |
|                                    | Wnt signaling pathway (P00057)      | 298                         | 6               | 0.44     | +                     | 13.67           | 6.88E-04 |
|                                    | Unclassified (UNCLASSIFIED)         | 18605                       | 22              | 27.41    | -                     | 0.8             | 0.00E+00 |
