# Supplementary material
Source: HighWire-hosted journal article supplement (https://gut.bmj.com/content/68/3/389)
Supplement: inline-supplementary-material-36 [file inline-supplementary-material-36.pdf]

Supplemental Table 14: Pathway analysis results performed on DETGs repressed in MM compared to HM EACs (Binom. Test, p-unadj).

|                                    |                                                                                                             | Reference (Homo sapiens)      Input Gene List |            |          |                       |                 |          |
|------------------------------------|-------------------------------------------------------------------------------------------------------------|-----------------------------------------------|------------|----------|-----------------------|-----------------|----------|
| Annotation Data Set                | Term                                                                                                        | Gene_Count                                    | Gene_Count | Expected | Over/Under-Enrichment | Fold_Enrichment | P-unadj  |
| PANTHER GO-Slim Molecular Function | intermediate filament binding (GO:0019215)                                                                  | 12                                            | 1          | 0.01     | +                     | 70.14           | 1.42E-02 |
|                                    | ligand-activated sequence-specific DNA binding RNA polymerase II transcription factor activity (GO:0004879) | 38                                            | 1          | 0.05     | +                     | 22.15           | 4.42E-02 |
|                                    | kinase activator activity (GO:0019209)                                                                      | 42                                            | 1          | 0.05     | +                     | 20.04           | 4.87E-02 |
|                                    | lipid transporter activity (GO:0005319)                                                                     | 43                                            | 1          | 0.05     | +                     | 19.57           | 4.99E-02 |
|                                    | lipid binding (GO:0008289)                                                                                  | 124                                           | 2          | 0.15     | +                     | 13.58           | 9.52E-03 |
|                                    | structural constituent of cytoskeleton (GO:0005200)                                                         | 246                                           | 2          | 0.29     | +                     | 6.84            | 3.43E-02 |
|                                    | transporter activity (GO:0005215)                                                                           | 922                                           | 4          | 1.1      | +                     | 3.65            | 2.23E-02 |
|                                    |                                                                                                             |                                               |            |          |                       |                 |          |
| PANTHER Pathways                   | Cell cycle (P00013)                                                                                         | 24                                            | 1          | 0.03     | +                     | 35.07           | 2.81E-02 |
