# Supplementary material
Source: HighWire-hosted journal article supplement (https://gut.bmj.com/content/68/3/389)
Supplement: inline-supplementary-material-37 [file inline-supplementary-material-37.pdf]

**Supplemental Table S17. *PTPN13* molecular assay sequences.**

|                                                      |                                                                                                           |
|------------------------------------------------------|-----------------------------------------------------------------------------------------------------------|
| <b>Methylated <i>PTPN13</i> qMS-PCR Primers</b>      |                                                                                                           |
| PTPN13-MS-M-R                                        | CGAGTAGTTTTAGCGGTTAC                                                                                      |
| PTPN13-MS-M-F                                        | AAAACCTTCTAACGCGAACGA                                                                                     |
| <b><i>PTPN13</i> qRT-PCR Primers</b>                 |                                                                                                           |
| PTPN13-F                                             | GCGCTCCAGTAGCAGGAC                                                                                        |
| PTPN13-R                                             | TCATCTGTAAATGACACACTAC                                                                                    |
| <b><i>PTPN13</i>-specific shRNA Target Sequences</b> |                                                                                                           |
| V3LHS_<br>387873                                     | TGCTGTTGACAGTGAGCGACTGGAGAATCTTCAAGAATTATAGTGAAG<br>CCACAGATGTATAATTCTGAAGATTCTCCAGCTGCCTACTGCCTCGGA      |
| V3LHS_<br>387875                                     | TGCTGTTGACAGTGAGCGACTGGATGTTGTGGATGAGGAATAGTGAA<br>GCCACAGATGTATTCCTCATCCACAACATCCAGCTGCCTACTGCCTCGG<br>A |
| V3LHS_<br>387872                                     | TGCTGTTGACAGTGAGCGCATGGATGATGTTAGTCTAATATAGTGAAG<br>CCACAGATGTATATTAGACTAACATCATCCATATGCCTACTGCCTCGGA     |
| V2LHS_<br>57273                                      | TGCTGTTGACAGTGAGCGCCCAGTGAAAGTCCATCTATTATAGTGAAG<br>CCACAGATGTATAATAGATGGACTTTCCTGGATGCCTACTGCCTCGGA      |
| <b>shRNA Sequencing Primer</b>                       |                                                                                                           |
| Primer 1                                             | GCATTAAAGCAGCGTATC                                                                                        |
